# Supplementary material for: Politicization Undermines Trust in Institutions, Even Among the Ideologically Aligned Public
Source: Research Square preprint supplement (doi:10.21203/rs.3.rs-3239561/v1), 2023-09-20
Supplement: Supplementary file 1 [file 89cb67ff477233b60fda6821.docx]

**Supplement for: Politicization Undermines Trust in Institutions, Even Among the**

**Ideologically Aligned Public**

**Table of Contents**

Table S1 Study 1 Correlation Results p. 2

Table S2 Study 1 Regression Results p. 11

Study 1 Discussion of Anomalous Results p. 20

Study 2a Full Results p. 21

Study 2b Full Results p. 32

Study 3 Full Results p. 38

Study 4 Full Results p. 41

Study 5 Full Results p. 59

**Study 1 Correlation Results**

Note on interpreting correlational results:

1. Negative correlations between Politicization and Trust mean that as the institution was perceived as more politicized, the less it was trusted. For Slant and Trust, positive correlations indicate that as the institution was perceived as more right-leaning, the more it was trusted, and negative correlations indicate that as the institution was perceived as more left-leaning, the more it was trusted. For Participant (Ps) Ideology and Slant, positive correlations indicate that more right-leaning participants were more trusting and negative correlations indicate that more left-leaning participants were more trusting.
2. For Slant and Politicization, negative correlations indicate that as the institution was perceived as more right-leaning, the less it wass perceived as politicized, and positive correlations indicate that as the institution was perceived as more left-leaning, the less it was perceived as politicized.
3. For Ps Ideology and Politicization, positive correlations indicate that more right leaning participants saw the institution as more politicized, and negative correlations indicate that more left-leaning participants saw the institution as more politicized. Negative correlations between a Ps Ideology and Slant indicate that participant ideology was negatively associated with perceived institutional ideology (i.e., participants saw institutions as slanted more toward their outgroup).

| **Table S1.** *Correlations Between Trust, Politicization, Slant, and Participant Ideology (ns 306-309) in Study 1* | | | | | |
| --- | --- | --- | --- | --- | --- |
|  |  |  | Trust | Politicization | Slant |
| K12 Teachers | Politicization | *r* | -.517 |  |  |
|  |  | *p* | <.001 |  |  |
|  | Slant | *r* | .319 | -.300 |  |
|  |  | *p* | <.001 | <.001 |  |
|  | Ps Ideology | *r* | -.401 | .370 | -.261 |
|  |  | *p* | <.001 | <.001 | <.001 |
| Congress | Politicization | *r* | -.228 |  |  |
|  |  | *p* | <.001 |  |  |
|  | Slant | *r* | -.023 | .010 |  |
|  |  | *p* | .688 | .858 |  |
|  | Ps Ideology | *r* | .110 | -.094 | -.442 |
|  |  | *p* | .054 | .101 | <.001 |
| Firefighters | Politicization | *r* | -.251 |  |  |
|  |  | *p* | <.001 |  |  |
|  | Slant | *r* | -.020 | .051 |  |
|  |  | *p* | .732 | .374 |  |
|  | Ps Ideology | *r* | .247 | .095 | .070 |
|  |  | *p* | <.001 | .097 | .217 |
| Journalists | Politicization | *r* | -.519 |  |  |
|  |  | *p* | <.001 |  |  |
|  | Slant | *r* | .376 | -.299 |  |
|  |  | *p* | <.001 | <.001 |  |
|  | Ps Ideology | *r* | -.476 | .381 | -.481 |
|  |  | *p* | <.001 | <.001 | <.001 |
| WHO | Politicization | *r* | -.569 |  |  |
|  |  | *p* | <.001 |  |  |
|  | Slant | *r* | .346 | -.425 |  |
|  |  | *p* | <.001 | <.001 |  |
|  | Ps Ideology | *r* | -.589 | .476 | -.266 |
|  |  | *p* | <.001 | <.001 | <.001 |
| Park Rangers | Politicization | *r* | -.200 |  |  |
|  |  | *p* | <.001 |  |  |
|  | Slant | *r* | -.125 | .027 |  |
|  |  | *p* | .028 | .631 |  |
|  | Ps Ideology | *r* | .055 | .055 | .084 |
|  |  | *p* | .336 | .338 | .142 |
| Physicists | Politicization | *r* | -.458 |  |  |
|  |  | *p* | <.001 |  |  |
|  | Slant | *r* | .044 | -.089 |  |
|  |  | *p* | .443 | .118 |  |
|  | Ps Ideology | *r* | -.368 | .304 | .140 |
|  |  | *p* | <.001 | <.001 | .014 |
| ASPCA | Politicization | *r* | -.180 |  |  |
|  |  | *p* | .001 |  |  |
|  | Slant | *r* | .145 | -.349 |  |
|  |  | *p* | .011 | <.001 |  |
|  | Ps Ideology | *r* | -.137 | .134 | .179 |
|  |  | *p* | .016 | .018 | .002 |
| Dentists | Politicization | *r* | -.200 |  |  |
|  |  | *p* | <.001 |  |  |
|  | Slant | *r* | -.063 | .030 |  |
|  |  | *p* | .267 | .596 |  |
|  | Ps Ideology | *r* | .117 | .036 | -.057 |
|  |  | *p* | .039 | .530 | .317 |
| Professors | Politicization | *r* | -.572 |  |  |
|  |  | *p* | <.001 |  |  |
|  | Slant | *r* | .382 | -.447 |  |
|  |  | *p* | <.001 | <.001 |  |
|  | Ps Ideology | *r* | -.493 | .511 | -.250 |
|  |  | *p* | <.001 | <.001 | <.001 |
| Police Officers | Politicization | *r* | -.527 |  |  |
|  |  | *p* | <.001 |  |  |
|  | Slant | *r* | -.284 | .283 |  |
|  |  | *p* | <.001 | <.001 |  |
|  | Ps Ideology | *r* | .600 | -.432 | -.322 |
|  |  | *p* | <.001 | <.001 | <.001 |
| Pollsters | Politicization | *r* | -.450 |  |  |
|  |  | *p* | <.001 |  |  |
|  | Slant | *r* | .295 | -.275 |  |
|  |  | *p* | <.001 | <.001 |  |
|  | Ps Ideology | *r* | -.169 | .197 | -.469 |
|  |  | *p* | .003 | <.001 | <.001 |
| Supreme Court | Politicization | *r* | -.443 |  |  |
|  |  | *p* | <.001 |  |  |
|  | Slant | *r* | -.246 | .269 |  |
|  |  | *p* | <.001 | <.001 |  |
|  | Ps Ideology | *r* | .505 | -.405 | -.481 |
|  |  | *p* | <.001 | <.001 | <.001 |
| Doctors | Politicization | *r* | -.351 |  |  |
|  |  | *p* | <.001 |  |  |
|  | Slant | *r* | .113 | -.155 |  |
|  |  | *p* | .047 | .006 |  |
|  | Ps Ideology | *r* | -.048 | -.027 | -.015 |
|  |  | *p* | .403 | .641 | .790 |
| Lawyers | Politicization | *r* | -.161 |  |  |
|  |  | *p* | .005 |  |  |
|  | Slant | *r* | .024 | -.152 |  |
|  |  | *p* | .680 | .007 |  |
|  | Ps Ideology | *r* | -.002 | -.051 | -.281 |
|  |  | *p* | .971 | .368 | <.001 |
| USPS | Politicization | *r* | -.231 |  |  |
|  |  | *p* | <.001 |  |  |
|  | Slant | *r* | .090 | -.175 |  |
|  |  | *p* | .115 | .002 |  |
|  | Ps Ideology | *r* | -.152 | .088 | -.049 |
|  |  | *p* | .007 | .124 | .388 |
| Economists | Politicization | *r* | -.288 |  |  |
|  |  | *p* | <.001 |  |  |
|  | Slant | *r* | .024 | .020 |  |
|  |  | *p* | .675 | .730 |  |
|  | Ps Ideology | *r* | -.025 | .058 | -.303 |
|  |  | *p* | .661 | .308 | <.001 |
| Pharmaceutical Companies | Politicization | *r* | -.425 |  |  |
|  |  | *p* | <.001 |  |  |
|  | Slant | *r* | -.054 | -.015 |  |
|  |  | *p* | .347 | .792 |  |
|  | Ps Ideology | *r* | .103 | .022 | -.540 |
|  |  | *p* | .070 | .702 | <.001 |
| Scientists | Politicization | *r* | -.511 |  |  |
|  |  | *p* | <.001 |  |  |
|  | Slant | *r* | .124 | -.291 |  |
|  |  | *p* | .029 | <.001 |  |
|  | Ps Ideology | *r* | -.514 | .336 | .128 |
|  |  | *p* | <.001 | <.001 | .025 |
| MLB | Politicization | *r* | -.131 |  |  |
|  |  | *p* | .021 |  |  |
|  | Slant | *r* | -.008 | -.050 |  |
|  |  | *p* | .887 | .381 |  |
|  | Ps Ideology | *r* | .111 | .175 | -.282 |
|  |  | *p* | .051 | .002 | <.001 |
| Mechanics | Politicization | *r* | .004 |  |  |
|  |  | *p* | .939 |  |  |
|  | Slant | *r* | .010 | -.197 |  |
|  |  | *p* | .860 | <.001 |  |
|  | Ps Ideology | *r* | .206 | .102 | -.069 |
|  |  | *p* | <.001 | .073 | .230 |
| Chefs | Politicization | *r* | -.096 |  |  |
|  |  | *p* | .094 |  |  |
|  | Slant | *r* | .102 | -.141 |  |
|  |  | *p* | .075 | .014 |  |
|  | Ps Ideology | *r* | .060 | .154 | .071 |
|  |  | *p* | .298 | .007 | .218 |
| Librarians | Politicization | *r* | -.051 |  |  |
|  |  | *p* | .373 |  |  |
|  | Slant | *r* | .026 | -.203 |  |
|  |  | *p* | .654 | <.001 |  |
|  | Ps Ideology | *r* | -.327 | .109 | .163 |
|  |  | *p* | <.001 | .057 | .004 |
| Catholic Church | Politicization | *r* | -.338 |  |  |
|  |  | *p* | <.001 |  |  |
|  | Slant | *r* | -.173 | .421 |  |
|  |  | *p* | .002 | <.001 |  |
|  | Ps Ideology | *r* | .542 | -.275 | -.286 |
|  |  | *p* | <.001 | <.001 | <.001 |
| Veterinarians | Politicization | *r* | -.127 |  |  |
|  |  | *p* | .026 |  |  |
|  | Slant | *r* | .004 | -.144 |  |
|  |  | *p* | .942 | .012 |  |
|  | Ps Ideology | *r* | -.119 | .052 | .224 |
|  |  | *p* | .038 | .365 | <.001 |
| Tailors | Politicization | *r* | -.033 |  |  |
|  |  | *p* | .559 |  |  |
|  | Slant | *r* | .076 | -.113 |  |
|  |  | *p* | .183 | .047 |  |
|  | Ps Ideology | *r* | .069 | .052 | -.138 |
|  |  | *p* | .230 | .362 | .016 |
| United Nations | Politicization | *r* | -.252 |  |  |
|  |  | *p* | <.001 |  |  |
|  | Slant | *r* | .310 | -.134 |  |
|  |  | *p* | <.001 | .019 |  |
|  | Ps Ideology | *r* | -.413 | .101 | -.226 |
|  |  | *p* | <.001 | .076 | <.001 |
| Psychologists | Politicization | *r* | -.261 |  |  |
|  |  | *p* | <.001 |  |  |
|  | Slant | *r* | .128 | -.359 |  |
|  |  | *p* | .025 | <.001 |  |
|  | Ps Ideology | *r* | -.358 | .150 | -.007 |
|  |  | *p* | <.001 | .009 | .905 |
| Banks | Politicization | *r* | -.278 |  |  |
|  |  | *p* | <.001 |  |  |
|  | Slant | *r* | -.114 | .327 |  |
|  |  | *p* | .047 | <.001 |  |
|  | Ps Ideology | *r* | .262 | -.176 | -.433 |
|  |  | *p* | <.001 | .002 | <.001 |
| Hollywood | Politicization | *r* | .014 |  |  |
|  |  | *p* | .806 |  |  |
|  | Slant | *r* | .009 | -.357 |  |
|  |  | *p* | .877 | <.001 |  |
|  | Ps Ideology | *r* | .234 | .381 | -.355 |
|  |  | *p* | <.001 | <.001 | <.001 |
| State Judges | Politicization | *r* | -.080 |  |  |
|  |  | *p* | .164 |  |  |
|  | Slant | *r* | .110 | .114 |  |
|  |  | *p* | .055 | .046 |  |
|  | Ps Ideology | *r* | -.378 | -.103 | -.305 |
|  |  | *p* | <.001 | .071 | <.001 |
| Criminal Justice System | Politicization | *r* | -.424 |  |  |
|  |  | *p* | <.001 |  |  |
|  | Slant | *r* | -.086 | .120 |  |
|  |  | *p* | .133 | .036 |  |
|  | Ps Ideology | *r* | .322 | -.190 | -.489 |
|  |  | *p* | <.001 | <.001 | <.001 |
| Toll Booth Workers | Politicization | *r* | -.144 |  |  |
|  |  | *p* | .011 |  |  |
|  | Slant | *r* | .031 | -.041 |  |
|  |  | *p* | .585 | .476 |  |
|  | Ps Ideology | *r* | -.027 | .079 | -.052 |
|  |  | *p* | .636 | .167 | .367 |
| NFL | Politicization | *r* | -.209 |  |  |
|  |  | *p* | <.001 |  |  |
|  | Slant | *r* | .029 | -.053 |  |
|  |  | *p* | .607 | .355 |  |
|  | Ps Ideology | *r* | -.007 | .190 | -.367 |
|  |  | *p* | .904 | <.001 | <.001 |
| CIA | Politicization | *r* | -.478 |  |  |
|  |  | *p* | <.001 |  |  |
|  | Slant | *r* | .188 | -.122 |  |
|  |  | *p* | <.001 | .033 |  |
|  | Ps Ideology | *r* | -.037 | .093 | -.388 |
|  |  | *p* | .518 | .104 | <.001 |
| Real Estate Agents | Politicization | *r* | -.138 |  |  |
|  |  | *p* | .016 |  |  |
|  | Slant | *r* | -.089 | .151 |  |
|  |  | *p* | .121 | .008 |  |
|  | Ps Ideology | *r* | .212 | -.099 | -.290 |
|  |  | *p* | <.001 | .084 | <.001 |
| Local Business Owners | Politicization | *r* | -.064 |  |  |
|  |  | *p* | .261 |  |  |
|  | Slant | *r* | -.037 | .126 |  |
|  |  | *p* | .524 | .028 |  |
|  | Ps Ideology | *r* | .247 | -.017 | .146 |
|  |  | *p* | <.001 | .769 | .011 |
| Think Tanks | Politicization | *r* | -.199 |  |  |
|  |  | *p* | <.001 |  |  |
|  | Slant | *r* | .028 | -.005 |  |
|  |  | *p* | .626 | .929 |  |
|  | Ps Ideology | *r* | -.020 | -.001 | -.284 |
|  |  | *p* | .731 | .983 | <.001 |
| Facebook | Politicization | *r* | -.288 |  |  |
|  |  | *p* | <.001 |  |  |
|  | Slant | *r* | .112 | -.328 |  |
|  |  | *p* | .049 | <.001 |  |
|  | Ps Ideology | *r* | .022 | .275 | -.600 |
|  |  | *p* | .700 | <.001 | <.001 |
| PETA | Politicization | *r* | -.352 |  |  |
|  |  | *p* | <.001 |  |  |
|  | Slant | *r* | .137 | -.372 |  |
|  |  | *p* | .016 | <.001 |  |
|  | Ps Ideology | *r* | -.043 | .015 | -.030 |
|  |  | *p* | .448 | .794 | .597 |

**Study 1 Regression Results**

| **Table S2.** *Regressing Ideology, Slant, Politicization, and All 2way and 3way Interactions on Trust (Sp r = semipartial r)* | | | | | | | | | |
| --- | --- | --- | --- | --- | --- | --- | --- | --- | --- |
|  |  |  |  |  |  |  | **95% CI** | | ***Sp*** |
| **Group** |  | ***B*** | ***SE*** | ***Beta*** | ***t*** | ***p*** | **Low** | **High** | ***r*** |
| K12 Teachers | (Constant) | 4.29 | 0.07 |  | 64.68 | <.001 | 4.16 | 4.42 |  |
|  | **Participant Ideology** | **-0.26** | **0.07** | **-0.19** | **-3.88** | **<.001** | **-0.40** | **-0.13** | **-.17** |
|  | Slant | 0.05 | 0.07 | 0.04 | 0.73 | .464 | -0.09 | 0.19 | .03 |
|  | **Politicization** | **-0.45** | **0.07** | **-0.34** | **-6.65** | **<.001** | **-0.59** | **-0.32** | **-.29** |
|  | **Ideology x Slant** | **0.26** | **0.07** | **0.19** | **3.66** | **<.001** | **0.12** | **0.40** | **.16** |
|  | Ideology x Politicization | -0.13 | 0.07 | -0.09 | -1.91 | .058 | -0.26 | 0.00 | -.08 |
|  | Slant x Politicization | 0.13 | 0.07 | 0.11 | 1.98 | .049 | 0.00 | 0.27 | .09 |
|  | 3way | 0.07 | 0.06 | 0.06 | 1.08 | .283 | -0.06 | 0.19 | .05 |
| Congress | (Constant) | 2.11 | 0.07 |  | 31.46 | <.001 | 1.97 | 2.24 |  |
|  | Participant Ideology | 0.12 | 0.07 | 0.10 | 1.69 | .093 | -0.02 | 0.26 | .09 |
|  | Slant | 0.01 | 0.07 | 0.01 | 0.19 | .853 | -0.12 | 0.15 | .01 |
|  | **Politicization** | **-0.21** | **0.06** | **-0.18** | **-3.29** | **.001** | **-0.33** | **-0.08** | **-.18** |
|  | **Ideology x Slant** | **0.30** | **0.07** | **0.27** | **4.64** | **<.001** | **0.17** | **0.43** | **.25** |
|  | Ideology x Politicization | -0.10 | 0.07 | -0.08 | -1.41 | .160 | -0.24 | 0.04 | -.08 |
|  | Slant x Politicization | -0.02 | 0.06 | -0.02 | -0.33 | .743 | -0.14 | 0.10 | -.02 |
|  | 3way | -0.12 | 0.08 | -0.10 | -1.61 | .108 | -0.27 | 0.03 | -.09 |
| Firefighters | (Constant) | 4.88 | 0.07 |  | 73.82 | <.001 | 4.75 | 5.01 |  |
|  | **Participant Ideology** | **0.33** | **0.07** | **0.25** | **4.85** | **<.001** | **0.20** | **0.46** | **.25** |
|  | Slant | -0.02 | 0.07 | -0.01 | -0.24 | .809 | -0.15 | 0.12 | -.01 |
|  | **Politicization** | **-0.43** | **0.07** | **-0.33** | **-6.13** | **<.001** | **-0.56** | **-0.29** | **-.31** |
|  | **Ideology x Slant** | **0.31** | **0.07** | **0.25** | **4.80** | **<.001** | **0.19** | **0.44** | **.24** |
|  | Ideology x Politicization | 0.07 | 0.07 | 0.06 | 1.08 | .281 | -0.06 | 0.21 | .06 |
|  | Slant x Politicization | -0.06 | 0.06 | -0.06 | -1.08 | .282 | -0.17 | 0.05 | -.05 |
|  | 3way | 0.09 | 0.05 | 0.10 | 1.81 | .071 | -0.01 | 0.19 | .09 |
| Journalists | (Constant) | 2.67 | 0.07 |  | 36.34 | <.001 | 2.52 | 2.81 |  |
|  | **Participant Ideology** | **-0.35** | **0.08** | **-0.26** | **-4.58** | **<.001** | **-0.50** | **-0.20** | **-.21** |
|  | Slant | 0.14 | 0.08 | 0.11 | 1.67 | .096 | -0.03 | 0.30 | .08 |
|  | **Politicization** | **-0.53** | **0.08** | **-0.40** | **-6.93** | **<.001** | **-0.67** | **-0.38** | **-.31** |
|  | Ideology x Slant | 0.12 | 0.09 | 0.08 | 1.40 | .162 | -0.05 | 0.29 | .06 |
|  | Ideology x Politicization | 0.00 | 0.08 | 0.00 | 0.00 | .997 | -0.15 | 0.15 | .00 |
|  | Slant x Politicization | 0.15 | 0.09 | 0.10 | 1.74 | .083 | -0.02 | 0.32 | .08 |
|  | 3way | -0.12 | 0.09 | -0.08 | -1.29 | .197 | -0.29 | 0.06 | -.06 |
| WHO | (Constant) | 3.88 | 0.09 |  | 44.07 | <.001 | 3.71 | 4.05 |  |
|  | **Participant Ideology** | **-0.63** | **0.09** | **-0.35** | **-7.12** | **<.001** | **-0.81** | **-0.46** | **-.28** |
|  | Slant | -0.03 | 0.10 | -0.02 | -0.33 | .745 | -0.23 | 0.17 | -.01 |
|  | **Politicization** | **-0.56** | **0.09** | **-0.32** | **-6.27** | **<.001** | **-0.74** | **-0.39** | **-.25** |
|  | **Ideology x Slant** | **0.27** | **0.10** | **0.15** | **2.76** | **.006** | **0.08** | **0.46** | **.11** |
|  | Ideology x Politicization | 0.07 | 0.09 | 0.04 | 0.81 | .421 | -0.10 | 0.25 | .03 |
|  | **Slant x Politicization** | **0.27** | **0.09** | **0.16** | **2.96** | **.003** | **0.09** | **0.46** | **.12** |
|  | 3way | 0.09 | 0.09 | 0.06 | 0.94 | .350 | -0.10 | 0.27 | .04 |
| Park Rangers | (Constant) | 4.63 | 0.07 |  | 69.55 | <.001 | 4.50 | 4.76 |  |
|  | Participant Ideology | 0.09 | 0.07 | 0.08 | 1.39 | .167 | -0.04 | 0.23 | .07 |
|  | **Slant** | **-0.13** | **0.07** | **-0.11** | **-1.86** | **.063** | **-0.28** | **0.01** | **-.10** |
|  | **Politicization** | **-0.23** | **0.07** | **-0.19** | **-3.43** | **<.001** | **-0.37** | **-0.10** | **-.18** |
|  | **Ideology x Slant** | **0.28** | **0.07** | **0.24** | **4.12** | **<.001** | **0.15** | **0.42** | **.22** |
|  | **Ideology x Politicization** | **0.17** | **0.07** | **0.14** | **2.49** | **.013** | **0.04** | **0.30** | **.13** |
|  | Slant x Politicization | 0.02 | 0.06 | 0.02 | 0.33 | .739 | -0.09 | 0.13 | .02 |
|  | 3way | -0.03 | 0.05 | -0.03 | -0.54 | .589 | -0.12 | 0.07 | -.03 |
| Physicists | (Constant) | 4.54 | 0.07 |  | 61.68 | <.001 | 4.40 | 4.69 |  |
|  | **Participant Ideology** | **-0.32** | **0.08** | **-0.22** | **-4.21** | **<.001** | **-0.47** | **-0.17** | **-.20** |
|  | Slant | 0.02 | 0.08 | 0.02 | 0.27 | .790 | -0.14 | 0.18 | .01 |
|  | **Politicization** | **-0.48** | **0.08** | **-0.34** | **-6.37** | **<.001** | **-0.63** | **-0.33** | **-.30** |
|  | **Ideology x Slant** | **0.18** | **0.08** | **0.13** | **2.22** | **.027** | **0.02** | **0.35** | **.11** |
|  | Ideology x Politicization | -0.11 | 0.07 | -0.08 | -1.55 | .123 | -0.26 | 0.03 | -.07 |
|  | **Slant x Politicization** | **0.17** | **0.07** | **0.16** | **2.37** | **.018** | **0.03** | **0.31** | **.11** |
|  | 3way | -0.09 | 0.06 | -0.09 | -1.40 | .164 | -0.21 | 0.04 | -.07 |
| ASPCA | (Constant) | 4.00 | 0.09 |  | 45.66 | <.001 | 3.83 | 4.17 |  |
|  | **Participant Ideology** | **-0.17** | **0.09** | **-0.12** | **-1.98** | **.049** | **-0.35** | **0.00** | **-.11** |
|  | Slant | 0.10 | 0.10 | 0.07 | 1.00 | .320 | -0.10 | 0.29 | .05 |
|  | **Politicization** | **-0.26** | **0.09** | **-0.18** | **-2.90** | **.004** | **-0.44** | **-0.08** | **-.15** |
|  | **Ideology x Slant** | **0.46** | **0.10** | **0.32** | **4.79** | **<.001** | **0.27** | **0.65** | **.25** |
|  | **Ideology x Politicization** | **0.27** | **0.09** | **0.18** | **3.06** | **.002** | **0.10** | **0.44** | **.16** |
|  | Slant x Politicization | -0.12 | 0.08 | -0.10 | -1.46 | .146 | -0.28 | 0.04 | -.08 |
|  | 3way | 0.08 | 0.08 | 0.07 | 0.98 | .327 | -0.08 | 0.23 | .05 |
| Dentists | (Constant) | 4.53 | 0.07 |  | 67.58 | <.001 | 4.40 | 4.66 |  |
|  | **Participant Ideology** | **0.15** | **0.07** | **0.12** | **2.20** | **.029** | **0.02** | **0.28** | **.12** |
|  | Slant | -0.07 | 0.07 | -0.05 | -0.91 | .366 | -0.21 | 0.08 | -.05 |
|  | **Politicization** | **-0.27** | **0.07** | **-0.22** | **-3.84** | **<.001** | **-0.40** | **-0.13** | **-.21** |
|  | **Ideology x Slant** | **0.21** | **0.07** | **0.18** | **2.94** | **.004** | **0.07** | **0.35** | **.16** |
|  | Ideology x Politicization | 0.10 | 0.07 | 0.08 | 1.46 | .145 | -0.03 | 0.23 | .08 |
|  | Slant x Politicization | -0.04 | 0.06 | -0.05 | -0.69 | .488 | -0.16 | 0.08 | -.04 |
|  | 3way | 0.05 | 0.05 | 0.07 | 0.99 | .324 | -0.05 | 0.15 | .05 |
| Professors | (Constant) | 3.83 | 0.08 |  | 49.82 | <.001 | 3.68 | 3.98 |  |
|  | **Participant Ideology** | **-0.35** | **0.08** | **-0.24** | **-4.54** | **<.001** | **-0.51** | **-0.20** | **-.19** |
|  | Slant | 0.16 | 0.08 | 0.11 | 2.15 | .033 | 0.01 | 0.31 | .09 |
|  | **Politicization** | **-0.38** | **0.08** | **-0.27** | **-4.71** | **<.001** | **-0.54** | **-0.22** | **-.19** |
|  | **Ideology x Slant** | **0.45** | **0.08** | **0.29** | **5.50** | **<.001** | **0.29** | **0.60** | **.23** |
|  | Ideology x Politicization | 0.04 | 0.08 | 0.02 | 0.48 | .632 | -0.12 | 0.20 | .02 |
|  | Slant x Politicization | -0.01 | 0.07 | 0.00 | -0.09 | .926 | -0.15 | 0.13 | .00 |
|  | 3way | 0.15 | 0.07 | 0.10 | 2.01 | .045 | 0.00 | 0.29 | .08 |
| Police | (Constant) | 3.43 | 0.08 |  | 42.76 | <.001 | 3.27 | 3.59 |  |
|  | **Participant Ideology** | **0.74** | **0.08** | **0.43** | **8.96** | **<.001** | **0.58** | **0.91** | **.37** |
|  | Slant | -0.08 | 0.09 | -0.05 | -0.91 | .366 | -0.25 | 0.09 | -.04 |
|  | **Politicization** | **-0.57** | **0.08** | **-0.33** | **-6.78** | **<.001** | **-0.73** | **-0.40** | **-.28** |
|  | Ideology x Slant | 0.14 | 0.09 | 0.08 | 1.57 | .117 | -0.04 | 0.32 | .07 |
|  | Ideology x Politicization | 0.12 | 0.09 | 0.06 | 1.39 | .166 | -0.05 | 0.29 | .06 |
|  | Slant x Politicization | -0.18 | 0.08 | -0.11 | -2.24 | .026 | -0.33 | -0.02 | -.09 |
|  | 3way | -0.13 | 0.08 | -0.08 | -1.58 | .116 | -0.29 | 0.03 | -.07 |
| Pollsters | (Constant) | 2.88 | 0.08 |  | 37.83 | <.001 | 2.73 | 3.03 |  |
|  | Participant Ideology | -0.08 | 0.08 | -0.06 | -1.06 | .290 | -0.24 | 0.07 | -.05 |
|  | **Slant** | **0.26** | **0.09** | **0.19** | **2.74** | **.006** | **0.07** | **0.44** | **.13** |
|  | **Politicization** | **-0.45** | **0.08** | **-0.34** | **-5.83** | **<.001** | **-0.60** | **-0.30** | **-.28** |
|  | **Ideology x Slant** | **0.31** | **0.09** | **0.22** | **3.48** | **<.001** | **0.14** | **0.49** | **.17** |
|  | Ideology x Politicization | 0.10 | 0.08 | 0.07 | 1.30 | .195 | -0.05 | 0.25 | .06 |
|  | **Slant x Politicization** | **-0.21** | **0.09** | **-0.16** | **-2.24** | **.026** | **-0.38** | **-0.03** | **-.11** |
|  | 3way | -0.05 | 0.08 | -0.04 | -0.54 | .589 | -0.21 | 0.12 | -.03 |
| Supreme Court | (Constant) | 3.25 | 0.09 |  | 35.96 | <.001 | 3.08 | 3.43 |  |
|  | **Participant Ideology** | **0.63** | **0.09** | **0.38** | **6.72** | **<.001** | **0.45** | **0.82** | **.30** |
|  | Slant | 0.01 | 0.10 | 0.01 | 0.12 | .908 | -0.18 | 0.21 | .01 |
|  | **Politicization** | **-0.51** | **0.10** | **-0.31** | **-5.19** | **<.001** | **-0.70** | **-0.31** | **-.23** |
|  | **Ideology x Slant** | **0.46** | **0.10** | **0.26** | **4.60** | **<.001** | **0.26** | **0.65** | **.21** |
|  | Ideology x Politicization | 0.05 | 0.11 | 0.02 | 0.45 | .655 | -0.16 | 0.26 | .02 |
|  | Slant x Politicization | -0.14 | 0.12 | -0.07 | -1.15 | .253 | -0.38 | 0.10 | -.05 |
|  | 3way | -0.06 | 0.13 | -0.03 | -0.51 | .613 | -0.31 | 0.18 | -.02 |
| Doctors | (Constant) | 4.46 | 0.07 |  | 61.84 | <.001 | 4.32 | 4.61 |  |
|  | Participant Ideology | -0.04 | 0.07 | -0.03 | -0.51 | .611 | -0.18 | 0.11 | -.03 |
|  | Slant | -0.04 | 0.08 | -0.03 | -0.44 | .660 | -0.19 | 0.12 | -.02 |
|  | **Politicization** | **-0.43** | **0.07** | **-0.32** | **-5.94** | **<.001** | **-0.58** | **-0.29** | **-.31** |
|  | **Ideology x Slant** | **0.19** | **0.08** | **0.15** | **2.41** | **.017** | **0.03** | **0.34** | **.13** |
|  | Ideology x Politicization | 0.02 | 0.07 | 0.02 | 0.32 | .749 | -0.12 | 0.16 | .02 |
|  | **Slant x Politicization** | **0.16** | **0.07** | **0.15** | **2.21** | **.028** | **0.02** | **0.30** | **.12** |
|  | 3way | -0.01 | 0.06 | -0.01 | -0.12 | .904 | -0.13 | 0.12 | -.01 |
| Lawyers | (Constant) | 2.99 | 0.08 |  | 37.43 | <.001 | 2.83 | 3.14 |  |
|  | Participant Ideology | -0.02 | 0.08 | -0.01 | -0.20 | .841 | -0.18 | 0.14 | -.01 |
|  | Slant | -0.07 | 0.09 | -0.05 | -0.78 | .438 | -0.25 | 0.11 | -.04 |
|  | **Politicization** | **-0.16** | **0.08** | **-0.12** | **-2.04** | **.042** | **-0.32** | **-0.01** | **-.12** |
|  | **Ideology x Slant** | **0.16** | **0.09** | **0.11** | **1.71** | **.089** | **-0.02** | **0.34** | **.10** |
|  | Ideology x Politicization | -0.04 | 0.08 | -0.03 | -0.47 | .638 | -0.21 | 0.13 | -.03 |
|  | Slant x Politicization | 0.05 | 0.08 | 0.04 | 0.56 | .574 | -0.12 | 0.21 | .03 |
|  | 3way | 0.06 | 0.08 | 0.05 | 0.68 | .496 | -0.11 | 0.22 | .04 |
| USPS | (Constant) | 4.16 | 0.07 |  | 58.18 | <.001 | 4.02 | 4.30 |  |
|  | **Participant Ideology** | **-0.17** | **0.07** | **-0.13** | **-2.35** | **.019** | **-0.31** | **-0.03** | **-.13** |
|  | Slant | 0.08 | 0.08 | 0.06 | 0.94 | .350 | -0.08 | 0.24 | .05 |
|  | **Politicization** | **-0.24** | **0.08** | **-0.18** | **-3.15** | **.002** | **-0.38** | **-0.09** | **-.17** |
|  | **Ideology x Slant** | **0.38** | **0.08** | **0.28** | **4.67** | **<.001** | **0.22** | **0.54** | **.25** |
|  | Ideology x Politicization | 0.09 | 0.08 | 0.07 | 1.18 | .238 | -0.06 | 0.24 | .06 |
|  | Slant x Politicization | -0.02 | 0.06 | -0.03 | -0.43 | .671 | -0.13 | 0.09 | -.02 |
|  | 3way | -0.05 | 0.06 | -0.06 | -0.80 | .422 | -0.16 | 0.07 | -.04 |
| Economists | (Constant) | 3.59 | 0.06 |  | 56.57 | <.001 | 3.46 | 3.71 |  |
|  | Participant Ideology | -0.01 | 0.07 | -0.01 | -0.22 | .828 | -0.14 | 0.11 | -.01 |
|  | Slant | 0.00 | 0.07 | 0.00 | -0.06 | .956 | -0.15 | 0.14 | .00 |
|  | **Politicization** | **-0.21** | **0.07** | **-0.18** | **-3.26** | **.001** | **-0.34** | **-0.08** | **-.17** |
|  | **Ideology x Slant** | **0.24** | **0.07** | **0.21** | **3.19** | **.002** | **0.09** | **0.38** | **.17** |
|  | Ideology x Politicization | 0.08 | 0.07 | 0.07 | 1.26 | .207 | -0.05 | 0.21 | .07 |
|  | Slant x Politicization | 0.02 | 0.06 | 0.02 | 0.29 | .775 | -0.10 | 0.14 | .02 |
|  | **3way** | **0.12** | **0.06** | **0.14** | **2.04** | **.042** | **0.00** | **0.23** | **.11** |
| Pharmaceutical | (Constant) | 2.48 | 0.08 |  | 31.13 | <.001 | 2.32 | 2.63 |  |
| Companies | **Participant Ideology** | **0.17** | **0.08** | **0.12** | **2.02** | **.044** | **0.00** | **0.33** | **.10** |
|  | Slant | -0.14 | 0.10 | -0.11 | -1.39 | .167 | -0.33 | 0.06 | -.07 |
|  | **Politicization** | **-0.38** | **0.08** | **-0.29** | **-4.79** | **<.001** | **-0.54** | **-0.23** | **-.23** |
|  | **Ideology x Slant** | **0.50** | **0.10** | **0.35** | **5.04** | **<.001** | **0.31** | **0.70** | **.25** |
|  | Ideology x Politicization | 0.12 | 0.08 | 0.09 | 1.50 | .135 | -0.04 | 0.28 | .07 |
|  | **Slant x Politicization** | **0.21** | **0.09** | **0.18** | **2.51** | **.013** | **0.05** | **0.38** | **.12** |
|  | 3way | -0.14 | 0.08 | -0.12 | -1.77 | .077 | -0.30 | 0.02 | -.09 |
| Scientists | (Constant) | 4.45 | 0.08 |  | 52.73 | <.001 | 4.28 | 4.61 |  |
|  | **Participant Ideology** | **-0.57** | **0.09** | **-0.36** | **-6.69** | **<.001** | **-0.74** | **-0.41** | **-.29** |
|  | Slant | 0.02 | 0.09 | 0.01 | 0.19 | .851 | -0.16 | 0.20 | .01 |
|  | **Politicization** | **-0.51** | **0.08** | **-0.33** | **-6.36** | **<.001** | **-0.67** | **-0.35** | **-.28** |
|  | Ideology x Slant | 0.12 | 0.09 | 0.08 | 1.32 | .189 | -0.06 | 0.30 | .06 |
|  | Ideology x Politicization | -0.16 | 0.09 | -0.10 | -1.91 | .057 | -0.33 | 0.01 | -.08 |
|  | Slant x Politicization | 0.06 | 0.08 | 0.04 | 0.76 | .446 | -0.10 | 0.22 | .03 |
|  | 3way | 0.05 | 0.08 | 0.04 | 0.64 | .525 | -0.11 | 0.21 | .03 |
| MLB | (Constant) | 3.47 | 0.08 |  | 45.66 | <.001 | 3.32 | 3.62 |  |
|  | **Participant Ideology** | **0.16** | **0.08** | **0.12** | **2.04** | **.043** | **0.01** | **0.31** | **.11** |
|  | Slant | -0.05 | 0.08 | -0.04 | -0.62 | .537 | -0.21 | 0.11 | -.03 |
|  | Politicization | -0.14 | 0.08 | -0.10 | -1.67 | .095 | -0.30 | 0.02 | -.09 |
|  | **Ideology x Slant** | **0.31** | **0.08** | **0.23** | **3.77** | **<.001** | **0.15** | **0.47** | **.21** |
|  | Ideology x Politicization | 0.03 | 0.08 | 0.02 | 0.34 | .735 | -0.13 | 0.18 | .02 |
|  | Slant x Politicization | 0.07 | 0.06 | 0.08 | 1.12 | .263 | -0.05 | 0.19 | .06 |
|  | 3way | -0.01 | 0.06 | -0.01 | -0.08 | .937 | -0.12 | 0.11 | .00 |
| Mechanics | (Constant) | 3.50 | 0.07 |  | 52.55 | <.001 | 3.37 | 3.63 |  |
|  | **Participant Ideology** | **0.25** | **0.07** | **0.21** | **3.73** | **<.001** | **0.12** | **0.38** | **.21** |
|  | Slant | 0.05 | 0.07 | 0.04 | 0.69 | .488 | -0.09 | 0.19 | .04 |
|  | Politicization | -0.07 | 0.07 | -0.06 | -1.01 | .312 | -0.21 | 0.07 | -.06 |
|  | Ideology x Slant | 0.10 | 0.07 | 0.09 | 1.48 | .140 | -0.03 | 0.24 | .08 |
|  | **Ideology x Politicization** | **0.13** | **0.07** | **0.11** | **1.87** | **.062** | **-0.01** | **0.26** | **.11** |
|  | Slant x Politicization | -0.05 | 0.06 | -0.05 | -0.75 | .453 | -0.16 | 0.07 | -.04 |
|  | 3way | -0.04 | 0.05 | -0.05 | -0.78 | .434 | -0.15 | 0.06 | -.04 |
| Chefs | (Constant) | 4.33 | 0.07 |  | 65.24 | <.001 | 4.20 | 4.46 |  |
|  | Participant Ideology | 0.10 | 0.07 | 0.09 | 1.45 | .149 | -0.04 | 0.23 | .08 |
|  | Slant | 0.04 | 0.07 | 0.04 | 0.60 | .548 | -0.10 | 0.18 | .03 |
|  | **Politicization** | **-0.12** | **0.07** | **-0.11** | **-1.72** | **.087** | **-0.27** | **0.02** | **-.10** |
|  | **Ideology x Slant** | **0.13** | **0.07** | **0.12** | **1.91** | **.057** | **0.00** | **0.27** | **.11** |
|  | Ideology x Politicization | 0.03 | 0.07 | 0.03 | 0.40 | .691 | -0.11 | 0.17 | .02 |
|  | Slant x Politicization | -0.02 | 0.06 | -0.02 | -0.27 | .790 | -0.14 | 0.11 | -.02 |
|  | 3way | 0.06 | 0.06 | 0.07 | 0.91 | .366 | -0.06 | 0.17 | .05 |
| Librarians | (Constant) | 4.92 | 0.08 |  | 65.50 | <.001 | 4.78 | 5.07 |  |
|  | **Participant Ideology** | **-0.41** | **0.07** | **-0.31** | **-5.61** | **<.001** | **-0.56** | **-0.27** | **-.30** |
|  | Slant | 0.00 | 0.08 | 0.00 | -0.01 | .989 | -0.16 | 0.16 | .00 |
|  | Politicization | -0.02 | 0.08 | -0.02 | -0.30 | .764 | -0.18 | 0.13 | -.02 |
|  | **Ideology x Slant** | **0.29** | **0.08** | **0.23** | **3.84** | **<.001** | **0.14** | **0.44** | **.20** |
|  | Ideology x Politicization | -0.09 | 0.07 | -0.07 | -1.18 | .241 | -0.23 | 0.06 | -.06 |
|  | Slant x Politicization | 0.04 | 0.08 | 0.04 | 0.59 | .553 | -0.10 | 0.19 | .03 |
|  | 3way | 0.01 | 0.07 | 0.01 | 0.21 | .836 | -0.12 | 0.15 | .01 |
| Catholic Church | (Constant) | 2.77 | 0.09 |  | 31.74 | <.001 | 2.60 | 2.95 |  |
|  | **Participant Ideology** | **0.75** | **0.09** | **0.47** | **8.58** | **<.001** | **0.58** | **0.92** | **.40** |
|  | Slant | 0.11 | 0.09 | 0.07 | 1.19 | .236 | -0.07 | 0.30 | .06 |
|  | **Politicization** | **-0.42** | **0.09** | **-0.26** | **-4.57** | **<.001** | **-0.60** | **-0.24** | **-.21** |
|  | Ideology x Slant | 0.08 | 0.09 | 0.05 | 0.84 | .400 | -0.11 | 0.27 | .04 |
|  | **Ideology x Politicization** | **0.22** | **0.09** | **0.14** | **2.53** | **.012** | **0.05** | **0.39** | **.12** |
|  | Slant x Politicization | -0.06 | 0.08 | -0.04 | -0.69 | .492 | -0.22 | 0.11 | -.03 |
|  | 3way | 0.06 | 0.08 | 0.04 | 0.77 | .444 | -0.10 | 0.22 | .04 |
| Veterinarians | (Constant) | 4.70 | 0.07 |  | 66.89 | <.001 | 4.57 | 4.84 |  |
|  | **Participant Ideology** | **-0.12** | **0.07** | **-0.10** | **-1.70** | **.089** | **-0.26** | **0.02** | **-.10** |
|  | Slant | -0.06 | 0.08 | -0.05 | -0.83 | .405 | -0.21 | 0.09 | -.05 |
|  | **Politicization** | **-0.14** | **0.08** | **-0.12** | **-1.85** | **.065** | **-0.29** | **0.01** | **-.10** |
|  | **Ideology x Slant** | **0.25** | **0.07** | **0.21** | **3.61** | **<.001** | **0.11** | **0.39** | **.20** |
|  | Ideology x Politicization | 0.08 | 0.07 | 0.07 | 1.11 | .267 | -0.06 | 0.22 | .06 |
|  | Slant x Politicization | 0.05 | 0.06 | 0.05 | 0.78 | .437 | -0.07 | 0.16 | .04 |
|  | 3way | -0.03 | 0.06 | -0.04 | -0.61 | .540 | -0.14 | 0.08 | -.03 |
| Tailors | (Constant) | 4.41 | 0.06 |  | 69.59 | <.001 | 4.28 | 4.53 |  |
|  | Participant Ideology | 0.09 | 0.06 | 0.08 | 1.37 | .170 | -0.04 | 0.21 | .08 |
|  | Slant | 0.08 | 0.07 | 0.07 | 1.17 | .244 | -0.06 | 0.21 | .07 |
|  | Politicization | -0.05 | 0.07 | -0.05 | -0.82 | .416 | -0.18 | 0.08 | -.05 |
|  | Ideology x Slant | 0.10 | 0.07 | 0.09 | 1.42 | .158 | -0.04 | 0.23 | .08 |
|  | Ideology x Politicization | 0.07 | 0.06 | 0.07 | 1.11 | .269 | -0.05 | 0.18 | .06 |
|  | Slant x Politicization | -0.05 | 0.06 | -0.06 | -0.83 | .408 | -0.16 | 0.07 | -.05 |
|  | 3way | 0.00 | 0.05 | 0.01 | 0.09 | .925 | -0.09 | 0.10 | .01 |
| UN | (Constant) | 3.24 | 0.07 |  | 44.90 | <.001 | 3.10 | 3.39 |  |
|  | **Participant Ideology** | **-0.54** | **0.07** | **-0.38** | **-7.56** | **<.001** | **-0.68** | **-0.40** | **-.35** |
|  | **Slant** | **0.22** | **0.08** | **0.15** | **2.89** | **.004** | **0.07** | **0.37** | **.13** |
|  | Politicization | -0.11 | 0.07 | -0.08 | -1.54 | .125 | -0.26 | 0.03 | -.07 |
|  | **Ideology x Slant** | **0.54** | **0.08** | **0.37** | **7.20** | **<.001** | **0.40** | **0.69** | **.33** |
|  | Ideology x Politicization | -0.02 | 0.07 | -0.02 | -0.32 | .746 | -0.17 | 0.12 | -.02 |
|  | Slant x Politicization | -0.10 | 0.08 | -0.07 | -1.33 | .184 | -0.25 | 0.05 | -.06 |
|  | 3way | -0.07 | 0.07 | -0.05 | -0.97 | .335 | -0.22 | 0.07 | -.04 |
| Psychologists | (Constant) | 4.09 | 0.07 |  | 59.84 | <.001 | 3.96 | 4.23 |  |
|  | **Participant Ideology** | **-0.35** | **0.07** | **-0.28** | **-5.13** | **<.001** | **-0.49** | **-0.22** | **-.26** |
|  | Slant | 0.02 | 0.07 | 0.02 | 0.29 | .772 | -0.12 | 0.17 | .02 |
|  | **Politicization** | **-0.15** | **0.07** | **-0.12** | **-2.09** | **.037** | **-0.29** | **-0.01** | **-.11** |
|  | **Ideology x Slant** | **0.27** | **0.07** | **0.22** | **3.78** | **<.001** | **0.13** | **0.41** | **.19** |
|  | Ideology x Politicization | 0.05 | 0.07 | 0.04 | 0.64 | .522 | -0.10 | 0.19 | .03 |
|  | Slant x Politicization | 0.12 | 0.07 | 0.11 | 1.76 | .080 | -0.02 | 0.26 | .09 |
|  | 3way | 0.04 | 0.07 | 0.04 | 0.63 | .529 | -0.09 | 0.17 | .03 |
| Banks | (Constant) | 3.10 | 0.09 |  | 33.39 | <.001 | 2.92 | 3.29 |  |
|  | **Participant Ideology** | **0.33** | **0.09** | **0.22** | **3.55** | **<.001** | **0.15** | **0.51** | **.19** |
|  | Slant | -0.04 | 0.10 | -0.02 | -0.35 | .726 | -0.24 | 0.17 | -.02 |
|  | **Politicization** | **-0.27** | **0.10** | **-0.18** | **-2.72** | **.007** | **-0.46** | **-0.07** | **-.14** |
|  | **Ideology x Slant** | **0.41** | **0.10** | **0.27** | **4.22** | **<.001** | **0.22** | **0.61** | **.22** |
|  | Ideology x Politicization | -0.04 | 0.10 | -0.03 | -0.37 | .709 | -0.23 | 0.16 | -.02 |
|  | Slant x Politicization | 0.03 | 0.09 | 0.02 | 0.30 | .765 | -0.16 | 0.21 | .02 |
|  | 3way | -0.01 | 0.09 | -0.01 | -0.16 | .873 | -0.18 | 0.15 | -.01 |
| Hollywood | (Constant) | 3.31 | 0.09 |  | 39.08 | <.001 | 3.14 | 3.47 |  |
|  | **Participant Ideology** | **0.41** | **0.08** | **0.31** | **4.89** | **<.001** | **0.25** | **0.58** | **.27** |
|  | Slant | 0.11 | 0.08 | 0.08 | 1.31 | .191 | -0.06 | 0.27 | .07 |
|  | Politicization | 0.01 | 0.09 | 0.01 | 0.10 | .924 | -0.16 | 0.18 | .01 |
|  | **Ideology x Slant** | **0.19** | **0.08** | **0.13** | **2.33** | **.021** | **0.03** | **0.34** | **.13** |
|  | Ideology x Politicization | 0.09 | 0.09 | 0.06 | 1.01 | .313 | -0.08 | 0.26 | .06 |
|  | Slant x Politicization | -0.02 | 0.08 | -0.01 | -0.23 | .822 | -0.18 | 0.15 | -.01 |
|  | **3way** | **0.22** | **0.10** | **0.15** | **2.34** | **.020** | **0.04** | **0.41** | **.13** |
| State Judges | (Constant) | 2.10 | 0.06 |  | 33.18 | <.001 | 1.97 | 2.22 |  |
|  | **Participant Ideology** | **-0.44** | **0.06** | **-0.40** | **-7.18** | **<.001** | **-0.57** | **-0.32** | **-.38** |
|  | Slant | 0.00 | 0.07 | 0.00 | 0.01 | .995 | -0.13 | 0.14 | .00 |
|  | **Politicization** | **-0.13** | **0.06** | **-0.12** | **-2.09** | **.038** | **-0.26** | **-0.01** | **-.11** |
|  | **Ideology x Slant** | **0.18** | **0.07** | **0.15** | **2.60** | **.010** | **0.04** | **0.31** | **.14** |
|  | Ideology x Politicization | 0.10 | 0.06 | 0.09 | 1.60 | .111 | -0.02 | 0.22 | .08 |
|  | Slant x Politicization | 0.02 | 0.07 | 0.02 | 0.26 | .797 | -0.12 | 0.16 | .01 |
|  | 3way | -0.08 | 0.07 | -0.07 | -1.18 | .238 | -0.22 | 0.05 | -.06 |
| Criminal Justice | (Constant) | 3.02 | 0.08 |  | 39.37 | <.001 | 2.86 | 3.17 |  |
| System | **Participant Ideology** | **0.34** | **0.08** | **0.25** | **4.57** | **<.001** | **0.20** | **0.49** | **.22** |
|  | Slant | 0.09 | 0.09 | 0.07 | 1.07 | .284 | -0.08 | 0.26 | .05 |
|  | **Politicization** | **-0.47** | **0.07** | **-0.34** | **-6.37** | **<.001** | **-0.62** | **-0.33** | **-.30** |
|  | **Ideology x Slant** | **0.41** | **0.08** | **0.27** | **4.98** | **<.001** | **0.25** | **0.57** | **.24** |
|  | Ideology x Politicization | 0.07 | 0.07 | 0.05 | 0.98 | .329 | -0.07 | 0.21 | .05 |
|  | Slant x Politicization | -0.12 | 0.08 | -0.09 | -1.46 | .145 | -0.29 | 0.04 | -.07 |
|  | 3way | -0.04 | 0.07 | -0.03 | -0.50 | .615 | -0.18 | 0.11 | -.02 |
| Toll Booth | (Constant) | 4.18 | 0.07 |  | 62.74 | <.001 | 4.05 | 4.31 |  |
| Workers | Participant Ideology | 0.00 | 0.07 | 0.00 | -0.06 | .956 | -0.13 | 0.13 | .00 |
|  | Slant | -0.03 | 0.07 | -0.03 | -0.42 | .678 | -0.17 | 0.11 | -.02 |
|  | **Politicization** | **-0.21** | **0.07** | **-0.17** | **-3.02** | **.003** | **-0.34** | **-0.07** | **-.17** |
|  | **Ideology x Slant** | **0.16** | **0.07** | **0.15** | **2.37** | **.018** | **0.03** | **0.29** | **.13** |
|  | **Ideology x Politicization** | **0.16** | **0.07** | **0.14** | **2.44** | **.015** | **0.03** | **0.29** | **.14** |
|  | Slant x Politicization | 0.01 | 0.06 | 0.01 | 0.23 | .821 | -0.10 | 0.13 | .01 |
|  | 3way | -0.03 | 0.05 | -0.03 | -0.52 | .607 | -0.12 | 0.07 | -.03 |
| NFL | (Constant) | 2.87 | 0.07 |  | 39.25 | <.001 | 2.72 | 3.01 |  |
|  | Participant Ideology | 0.00 | 0.07 | 0.00 | -0.04 | .967 | -0.15 | 0.14 | .00 |
|  | Slant | -0.10 | 0.08 | -0.09 | -1.31 | .192 | -0.26 | 0.05 | -.07 |
|  | **Politicization** | **-0.14** | **0.08** | **-0.12** | **-1.79** | **.074** | **-0.30** | **0.01** | **-.10** |
|  | **Ideology x Slant** | **0.30** | **0.07** | **0.26** | **4.18** | **<.001** | **0.16** | **0.44** | **.22** |
|  | Ideology x Politicization | 0.12 | 0.08 | 0.10 | 1.53 | .127 | -0.03 | 0.28 | .08 |
|  | **Slant x Politicization** | **0.16** | **0.07** | **0.18** | **2.27** | **.024** | **0.02** | **0.31** | **.12** |
|  | 3way | 0.01 | 0.06 | 0.02 | 0.21 | .831 | -0.11 | 0.14 | .01 |
| CIA | (Constant) | 3.02 | 0.09 |  | 34.08 | <.001 | 2.84 | 3.19 |  |
|  | Participant Ideology | 0.04 | 0.09 | 0.02 | 0.43 | .665 | -0.13 | 0.21 | .02 |
|  | Slant | 0.12 | 0.10 | 0.08 | 1.19 | .236 | -0.08 | 0.33 | .06 |
|  | **Politicization** | **-0.60** | **0.09** | **-0.37** | **-6.80** | **<.001** | **-0.78** | **-0.43** | **-.33** |
|  | **Ideology x Slant** | **0.42** | **0.11** | **0.25** | **4.02** | **<.001** | **0.22** | **0.63** | **.19** |
|  | Ideology x Politicization | 0.11 | 0.09 | 0.07 | 1.30 | .194 | -0.06 | 0.29 | .06 |
|  | Slant x Politicization | -0.01 | 0.10 | -0.01 | -0.13 | .900 | -0.22 | 0.19 | -.01 |
|  | 3way | 0.09 | 0.10 | 0.06 | 0.89 | .374 | -0.11 | 0.29 | .04 |
| Realtors | (Constant) | 3.26 | 0.06 |  | 51.90 | <.001 | 3.14 | 3.39 |  |
|  | **Participant Ideology** | **0.18** | **0.06** | **0.16** | **2.80** | **.005** | **0.05** | **0.30** | **.15** |
|  | Slant | -0.04 | 0.07 | -0.04 | -0.57 | .568 | -0.18 | 0.10 | -.03 |
|  | **Politicization** | **-0.13** | **0.06** | **-0.11** | **-2.06** | **.041** | **-0.25** | **-0.01** | **-.11** |
|  | **Ideology x Slant** | **0.31** | **0.07** | **0.30** | **4.64** | **<.001** | **0.18** | **0.45** | **.25** |
|  | Ideology x Politicization | 0.09 | 0.06 | 0.08 | 1.50 | .135 | -0.03 | 0.20 | .08 |
|  | Slant x Politicization | 0.00 | 0.05 | 0.00 | 0.06 | .949 | -0.10 | 0.10 | .00 |
|  | 3way | -0.01 | 0.04 | -0.02 | -0.25 | .803 | -0.10 | 0.08 | -.01 |
| Local Business | (Constant) | 3.92 | 0.06 |  | 70.12 | <.001 | 3.81 | 4.03 |  |
| Owners | **Participant Ideology** | **0.25** | **0.06** | **0.25** | **4.54** | **<.001** | **0.14** | **0.36** | **.24** |
|  | **Slant** | **-0.14** | **0.06** | **-0.14** | **-2.33** | **.021** | **-0.26** | **-0.02** | **-.12** |
|  | Politicization | -0.05 | 0.06 | -0.05 | -0.81 | .419 | -0.16 | 0.07 | -.04 |
|  | **Ideology x Slant** | **0.33** | **0.06** | **0.33** | **5.64** | **<.001** | **0.22** | **0.45** | **.30** |
|  | Ideology x Politicization | 0.09 | 0.05 | 0.10 | 1.72 | .087 | -0.01 | 0.20 | .09 |
|  | Slant x Politicization | -0.04 | 0.06 | -0.04 | -0.68 | .497 | -0.15 | 0.07 | -.04 |
|  | 3way | -0.05 | 0.06 | -0.06 | -0.86 | .393 | -0.16 | 0.06 | -.05 |
| Think Tanks | (Constant) | 3.02 | 0.07 |  | 46.69 | <.001 | 2.89 | 3.14 |  |
|  | Participant Ideology | -0.06 | 0.06 | -0.05 | -0.93 | .354 | -0.19 | 0.07 | -.05 |
|  | Slant | -0.01 | 0.07 | 0.00 | -0.07 | .942 | -0.14 | 0.13 | .00 |
|  | Politicization | -0.08 | 0.07 | -0.07 | -1.23 | .219 | -0.22 | 0.05 | -.06 |
|  | **Ideology x Slant** | **0.36** | **0.07** | **0.32** | **5.51** | **<.001** | **0.23** | **0.49** | **.28** |
|  | Ideology x Politicization | 0.09 | 0.07 | 0.08 | 1.38 | .168 | -0.04 | 0.22 | .07 |
|  | Slant x Politicization | -0.03 | 0.07 | -0.02 | -0.37 | .713 | -0.16 | 0.11 | -.02 |
|  | **3way** | **0.17** | **0.06** | **0.17** | **2.82** | **.005** | **0.05** | **0.29** | **.15** |
| Facebook | (Constant) | 1.94 | 0.07 |  | 29.76 | <.001 | 1.81 | 2.07 |  |
|  | **Participant Ideology** | **0.16** | **0.07** | **0.17** | **2.39** | **.017** | **0.03** | **0.28** | **.13** |
|  | **Slant** | **0.14** | **0.07** | **0.15** | **1.99** | **.047** | **0.00** | **0.28** | **.10** |
|  | **Politicization** | **-0.15** | **0.06** | **-0.15** | **-2.28** | **.023** | **-0.27** | **-0.02** | **-.12** |
|  | **Ideology x Slant** | **0.34** | **0.07** | **0.30** | **4.68** | **<.001** | **0.20** | **0.48** | **.25** |
|  | Ideology x Politicization | 0.01 | 0.07 | 0.01 | 0.19 | .849 | -0.12 | 0.15 | .01 |
|  | Slant x Politicization | -0.01 | 0.07 | 0.00 | -0.06 | .950 | -0.15 | 0.14 | .00 |
|  | 3way | 0.04 | 0.07 | 0.04 | 0.62 | .539 | -0.10 | 0.19 | .03 |
| PETA | (Constant) | 2.87 | 0.09 |  | 33.30 | <.001 | 2.70 | 3.04 |  |
|  | Participant Ideology | -0.03 | 0.09 | -0.02 | -0.39 | .697 | -0.20 | 0.14 | -.02 |
|  | Slant | 0.02 | 0.09 | 0.01 | 0.24 | .813 | -0.15 | 0.19 | .01 |
|  | **Politicization** | **-0.43** | **0.09** | **-0.27** | **-4.84** | **<.001** | **-0.60** | **-0.25** | **-.24** |
|  | **Ideology x Slant** | **0.64** | **0.09** | **0.41** | **7.38** | **<.001** | **0.47** | **0.81** | **.36** |
|  | Ideology x Politicization | 0.01 | 0.09 | 0.00 | 0.05 | .958 | -0.17 | 0.18 | .00 |
|  | Slant x Politicization | 0.03 | 0.09 | 0.02 | 0.36 | .721 | -0.14 | 0.20 | .02 |
|  | 3way | 0.03 | 0.09 | 0.02 | 0.36 | .721 | -0.14 | 0.20 | .02 |

Note. Bold indicates |semipartial *r*| ≥ .10

**Study 1 Discussion of Anomalous Results**

There were significant three-way interactions for economists, Hollywood, and think tanks. For economists and think tanks, similar patterns were observed as for all other institutions such that the negative relationship between perceived politicization and trust was weaker among congruent than incongruent participants. Hollywood displayed a unique pattern: higher perceived politicization was related to higher trust among incongruent participants: Hollywood was perceived as very left-leaning and was trusted slightly more among right-leaning participants the more it was perceived as politicized. This pattern is perhaps explained by its other unique associations. Specifically, Hollywood was the only institution that was trusted more by its ideological outgroup, political conservatives.

For Major League Baseball (MLB), local business owners, and Facebook, congruent participants were slightly more trusting as they perceived those institutions as more politicized, and so in these three cases, politicization might be associated with higher trust among the ideologically-aligned public. We see no obvious way in which these three institutions are similar to one another and distinct from the others. The MLB was viewed as relatively non-politicized, local business owners as moderately politicized, and Facebook as relatively high in politicization. Given the small interactions, these may be false positives. Future research should confirm these patterns for these three institutions if they are of specific interest.

**Study 2a All Results**

**Manipulation checks**

First, we conducted single sample *t*-tests on the political slant of each organization against the midpoint of the scale (4.00) to confirm each organization was viewed as slanted in the direction we stated. As intended, professors (*M* = 2.35, *SD* = .93) and the WHO (*M* = 2.32, *SD* = .86) were judged as left of center, *p*s < .001, judges (*M* = 5.52, *SD* = .97) and police (*M* = 5.72, *SD* = .81) were judged as right of center, *p*s < .001, and doctors were evaluated as politically balanced (*M* = 4.00, *SD* = .64). Although firefighters were near the midpoint (*M* = 4.14, *SD* = .55), they were evaluated as slightly to the right, *p* <.001.

Next, we conducted six one-way ANOVAs testing whether the politicization manipulation impacted perceived politicization as we stated. The manipulation failed to influence perceived politicization for all six organizations, *η2*s < .009, *p*s > .09.

**Trust Correlations**

See Table S3 below. Consistent with Study 1, for all six institutions, higher perceived politicization was associated with lower trust. Other results demonstrated similar patterns as Study 1 as well. Participants were generally more trusting toward institutions slanted in their own direction: more rightwing participants were more trusting of judges and police, more leftwing participants were more trusting of professors and the WHO. Rightwing participants were also somewhat more trusting of firefighters, and leftwing participants somewhat more trusting of doctors.

For organizations generally perceived as slanted towards the right (judges and police), higher perceived right-slant was associated with higher perceived politicization. Similarly, for organizations perceived as slanted towards the left (professors and the WHO), higher perceived left-slant was associated with higher perceived politicization. For the two balanced groups (doctors and firefighters), perceptions of ideological slant were unrelated to perceived politization. Higher perceived rightwing slant was unrelated to trust for professors, judges, and doctors, and related to lower trust for firefighters and police, and higher trust for the WHO.

We again observed some evidence that participants view outgroup institutions as more slanted and more politicized. More rightwing participants perceived professors and the WHO as more politicized and judges and police as less politicized. Ideology was unrelated to perceived politicization for the two more balanced organizations (doctors and firefighters). Participant ideology was unrelated to perceived slant for professors, doctors, and the WHO. More right-leaning participants saw judges and police as less slanted to the right and firefighters as more slanted to the right.

| **Table S3** |  |  |  |  |  |
| --- | --- | --- | --- | --- | --- |
| *Correlations Between Trust, Politicization, Slant, and Participant Ideology (ns 590-602)* | | | | | |
|  |  |  | **Trust** | **Politicization** | **Slant** |
| Professors | Politicization | *r* | -.472 |  |  |
|  |  | *p* | <.001 |  |  |
|  | Slant | *r* | .091 | -.124 |  |
|  |  | *p* | .027 | .003 |  |
|  | Ps Ideology | *r* | -.524 | .354 | .050 |
|  |  | *p* | <.001 | <.001 | .221 |
| Judges | Politicization | *r* | -.445 |  |  |
|  |  | *p* | <.001 |  |  |
|  | Slant | *r* | .023 | .168 |  |
|  |  | *p* | .568 | <.001 |  |
|  | Ps Ideology | *r* | .251 | -.263 | -.232 |
|  |  | *p* | <.001 | <.001 | <.001 |
| Doctors | Politicization | *r* | -.373 |  |  |
|  |  | *p* | <.001 |  |  |
|  | Slant | *r* | -.041 | .050 |  |
|  |  | *p* | .321 | .227 |  |
|  | Ps Ideology | *r* | -.134 | .033 | -.033 |
|  |  | *p* | .001 | .430 | .420 |
| Police | Politicization | *r* | -.514 |  |  |
|  |  | *p* | <.001 |  |  |
|  | Slant | *r* | -.156 | .250 |  |
|  |  | *p* | <.001 | <.001 |  |
|  | Ps Ideology | *r* | .444 | -.419 | -.212 |
|  |  | *p* | <.001 | <.001 | <.001 |
| WHO | Politicization | *r* | -.336 |  |  |
|  |  | *p* | <.001 |  |  |
|  | Slant | *r* | .107 | -.206 |  |
|  |  | *p* | .009 | <.001 |  |
|  | Ps Ideology | *r* | -.554 | .268 | .030 |
|  |  | *p* | <.001 | <.001 | .460 |
| Firefighters | Politicization | *r* | -.156 |  |  |
|  |  | *p* | <.001 |  |  |
|  | Slant | *r* | -.159 | .086 |  |
|  |  | *p* | <.001 | .035 |  |
|  | Ps Ideology | *r* | .099 | .044 | .115 |
|  |  | *p* | .015 | .279 | .005 |

**Deference Correlations**

As can be seen in Table S4 below, similar to the trust results, higher perceived politicization was associated with less support and less deference towards their expertise for all six organizations, *r*s = -.10 to -.51, *p*s < .013.

Other patterns were also similar to those found for trust. Participants generally reported more support and deference toward institutions they perceived as *less* slanted in the direction that most people perceived them as slanted in. Specifically, higher perceived rightwing slant was associated with more support and deference toward professors and the WHO, *r*s = .14 to .15, *p*s < .001, and less support and deference toward police and firefighters, *r*s = -.15 to -.22, *p*s < .001. Perceived slant was unrelated to support and deference toward doctors and judges. And again, people reported greater willingness to support and defer to organizations generally perceived as slanted in their own ideological direction. Specifically, more right-leaning participants reported less willingness to support and defer to professors, doctors, and the WHO, *r*s = -.27 to -.62, *p*s < .001, and more willingness to support and defer to judges and police, *r*s = .36 to .50, *p*s < .001. Participant ideology was unrelated to support and deference toward firefighters.

| **Table S4** |  |  |  |  |  |
| --- | --- | --- | --- | --- | --- |
| *Correlations Between Deference, Politicization, Slant, and Ps Ideology (ns 591-602)* | | | | | |
|  |  |  | **Politicization** | **Slant** | **Ps Ideology** |
| Professors | Deference | *r* | -.506 | .154 | -.609 |
|  |  | *p* | <.001 | <.001 | <.001 |
| Judges | Deference | *r* | -.482 | -.011 | .362 |
|  |  | *p* | <.001 | .798 | <.001 |
| Doctors | Deference | *r* | -.333 | -.028 | -.272 |
|  |  | *p* | <.001 | .501 | <.001 |
| Police | Deference | *r* | -.508 | -.222 | .499 |
|  |  | *p* | <.001 | <.001 | <.001 |
| WHO | Deference | *r* | -.399 | .143 | -.618 |
|  |  | *p* | <.001 | <.001 | <.001 |
| Firefighters | Deference | *r* | -.103 | -.152 | -.065 |
|  |  | *p* | .012 | <.001 | .111 |

**Manipulation and Trust**

We conducted six one-way ANOVAs testing whether the (failed) politicization manipulation impacted trust. The manipulation similarly had no impact on trust for any of the six institutions, *η2*s < .010, *p*s > .06.

We also analyzed the main effects and interaction of the manipulation and participant ideology on trust. As can be seen in Table S5, more leftwing ideology predicted higher trust for professors, doctors, and the WHO, |*r*s| > .13, *p*s<.002, and more rightwing ideology predicted higher trust for judges, police, and firefighters, |*r*s| > .10, *p*s < .01. The manipulation did not have a significant effect for any institutions, |semipartial *r*s| < .06, *p*s > .10, nor did the interaction, |*r*s| < .05, *p*s > .10.

| **Table S5** |  |  |  |  |  |  |  |  |  |
| --- | --- | --- | --- | --- | --- | --- | --- | --- | --- |
| *Regressing Ideology, Manipulation, and 2way Interaction on Trust* | | | | | | | | | |
|  |  |  |  |  |  |  | **95% CI** | | **Semipartial** |
| **Group** |  | ***B*** | ***SE*** | ***Beta*** | ***t*** | ***p*** | **Low** | **High** | ***r*** |
| Professors | (Constant) | 5.04 | 0.09 |  | 53.39 | <.001 | 4.86 | 5.23 |  |
|  | Manipulation | 0.13 | 0.12 | 0.09 | 1.10 | .273 | -0.10 | 0.36 | .039 |
|  | Ideology | -0.40 | 0.03 | -0.52 | -14.89 | <.001 | -0.45 | -0.35 | -.523 |
|  | Interaction | -0.03 | 0.03 | -0.08 | -1.01 | .313 | -0.10 | 0.03 | -.035 |
| Judges | (Constant) | 2.84 | 0.10 |  | 28.98 | <.001 | 2.64 | 3.03 |  |
|  | Manipulation | -0.07 | 0.12 | -0.05 | -0.58 | .559 | -0.31 | 0.17 | -.023 |
|  | Ideology | 0.18 | 0.03 | 0.25 | 6.31 | <.001 | 0.12 | 0.23 | .252 |
|  | Interaction | 0.03 | 0.03 | 0.09 | 0.99 | .324 | -0.03 | 0.10 | .039 |
| Doctors | (Constant) | 4.52 | 0.09 |  | 49.37 | <.001 | 4.34 | 4.70 |  |
|  | Manipulation | -0.08 | 0.11 | -0.06 | -0.68 | .497 | -0.30 | 0.14 | -.028 |
|  | Ideology | -0.09 | 0.03 | -0.13 | -3.28 | .001 | -0.14 | -0.03 | -.134 |
|  | Interaction | 0.03 | 0.03 | 0.09 | 0.94 | .346 | -0.03 | 0.09 | .039 |
| Police | (Constant) | 2.16 | 0.10 |  | 20.69 | <.001 | 1.95 | 2.36 |  |
|  | Manipulation | -0.12 | 0.13 | -0.08 | -0.94 | .346 | -0.38 | 0.13 | -.035 |
|  | Ideology | 0.36 | 0.03 | 0.44 | 12.09 | <.001 | 0.30 | 0.42 | .443 |
|  | Interaction | 0.04 | 0.04 | 0.09 | 1.16 | .247 | -0.03 | 0.11 | .042 |
| WHO | (Constant) | 5.42 | 0.10 |  | 53.89 | <.001 | 5.22 | 5.62 |  |
|  | Manipulation | -0.05 | 0.12 | -0.03 | -0.37 | .713 | -0.28 | 0.19 | -.013 |
|  | Ideology | -0.46 | 0.03 | -0.55 | -16.26 | <.001 | -0.52 | -0.41 | -.554 |
|  | Interaction | 0.02 | 0.04 | 0.04 | 0.51 | .613 | -0.05 | 0.09 | .017 |
| Firefighters | (Constant) | 4.79 | 0.07 |  | 67.04 | <.001 | 4.65 | 4.93 |  |
|  | Manipulation | 0.12 | 0.09 | 0.12 | 1.35 | .177 | -0.05 | 0.29 | .055 |
|  | Ideology | 0.05 | 0.02 | 0.11 | 2.62 | .009 | 0.01 | 0.09 | .106 |
|  | Interaction | -0.01 | 0.03 | -0.04 | -0.40 | .687 | -0.06 | 0.04 | -.016 |

**Manipulation and Deference**

Because the manipulation failed to manipulate perceived politicization and had no impact on perceived trust, we do not fully report the ANOVAs testing the influence of the manipulation on support and deference, but the only significant effect was for firefighters and with a small effect, with the politicization condition (*M* = 4.86, *SD* = .72) having a slightly higher mean than the depoliticization condition (*M* = 4.67, *SD* = .74), *F*(2, 599) = 3.55, *p* = .029, *η2* = .012.

**Interactions Between Participant Ideology, Politicization, and Slant on Trust**

As in Study 1, we regressed participant ideology, perceived slant, perceived politicization, and all two- and three-way interactions on trust. As can be seen in Table S6 below, participant ideology was a significant predictor of trust for all six institutions, such that greater congruence predicted more trust, |*r*s| = .10 to .39. Perceived slant predicted trust only for Firefighters, *r*s = -.14, again indicating that an ideological imbalance in an institution *alone* has little impact on trust. Of most interest, for all six institutions, higher perceived politicization consistently predicted lower trust, *r*s = -.15 to -.36, and again with effect sizes comparable to effects for ideological congruence.

For judges, police, the WHO, and firefighters, the interactions between participant ideology and perceived slant were also significant predictors, *r*s = .10 to .13, such that greater congruence between participant ideology and perceived slant predicted greater trust. These effects were generally small and not found for professors or doctors. All other two- and three-way interactions were small and inconsistent. Once again, these patterns reflect that both left- and right-leaning participants trust both left- and right-leaning institutions less the more they are perceived as politicized.

| **Table S6** |  |  |  |  |  |  |  |  |  |
| --- | --- | --- | --- | --- | --- | --- | --- | --- | --- |
| *Regressing Ideology, Slant, Politicization, and All 2way and 3way Interactions on Trust* | | | | | | | | | |
|  |  |  |  |  |  |  | **95% CI** | |  |
| **Group** |  | ***B*** | ***SE*** | ***Beta*** | ***t*** | ***p*** | **Low** | **High** | ***r*** |
| Professors | (Constant) | 3.86 | 0.04 |  | 92.06 | <.001 | 3.78 | 3.95 |  |
|  | **Participant Ideology** | **-0.42** | **0.05** | **-0.34** | **-9.42** | **<.001** | **-0.51** | **-0.33** | **-.30** |
|  | Slant | -0.03 | 0.05 | -0.03 | -0.69 | .491 | -0.12 | 0.06 | -.02 |
|  | **Politicization** | **-0.38** | **0.04** | **-0.31** | **-9.12** | **<.001** | **-0.46** | **-0.30** | **-.29** |
|  | Ideology x Slant | 0.11 | 0.06 | 0.09 | 1.90 | .059 | 0.00 | 0.23 | .06 |
|  | **Ideology x Politicization** | **-0.18** | **0.04** | **-0.15** | **-4.22** | **<.001** | **-0.26** | **-0.10** | **-.13** |
|  | Slant x Politicization | 0.02 | 0.05 | 0.02 | 0.46 | .649 | -0.08 | 0.12 | .01 |
|  | 3way | 0.09 | 0.06 | 0.08 | 1.55 | .122 | -0.02 | 0.19 | .05 |
| Judges | (Constant) | 3.47 | 0.04 |  | 82.61 | <.001 | 3.38 | 3.55 |  |
|  | **Participant Ideology** | **0.18** | **0.04** | **0.16** | **4.33** | **<.001** | **0.10** | **0.27** | **.15** |
|  | Slant | 0.07 | 0.05 | 0.06 | 1.44 | .151 | -0.02 | 0.16 | .05 |
|  | **Politicization** | **-0.45** | **0.04** | **-0.40** | **-10.19** | **<.001** | **-0.53** | **-0.36** | **-.36** |
|  | **Ideology x Slant** | **0.15** | **0.04** | **0.15** | **3.69** | **<.001** | **0.07** | **0.23** | **.13** |
|  | Ideology x Politicization | 0.10 | 0.04 | 0.09 | 2.47 | .014 | 0.02 | 0.18 | .09 |
|  | Slant x Politicization | -0.08 | 0.04 | -0.08 | -1.86 | .064 | -0.17 | 0.01 | -.07 |
|  | 3way | 0.08 | 0.04 | 0.10 | 2.20 | .029 | 0.01 | 0.15 | .08 |
| Doctors | (Constant) | 4.27 | 0.04 |  | 111.14 | <.001 | 4.19 | 4.34 |  |
|  | **Participant Ideology** | **-0.12** | **0.04** | **-0.11** | **-2.91** | **.004** | **-0.19** | **-0.04** | **-.11** |
|  | Slant | -0.04 | 0.04 | -0.04 | -0.87 | .387 | -0.12 | 0.05 | -.03 |
|  | **Politicization** | **-0.36** | **0.04** | **-0.35** | **-9.06** | **<.001** | **-0.43** | **-0.28** | **-.34** |
|  | Ideology x Slant | 0.01 | 0.04 | 0.01 | 0.32 | .748 | -0.06 | 0.09 | .01 |
|  | Ideology x Politicization | -0.07 | 0.04 | -0.08 | -2.05 | .040 | -0.14 | 0.00 | -.08 |
|  | Slant x Politicization | -0.04 | 0.03 | -0.05 | -1.19 | .237 | -0.10 | 0.02 | -.05 |
|  | **3way** | **0.06** | **0.02** | **0.13** | **2.64** | **.008** | **0.02** | **0.11** | **.10** |
| Police | (Constant) | 3.38 | 0.05 |  | 68.02 | <.001 | 3.28 | 3.47 |  |
|  | **Participant Ideology** | **0.35** | **0.05** | **0.26** | **6.95** | **<.001** | **0.25** | **0.44** | **.23** |
|  | Slant | -0.07 | 0.05 | -0.05 | -1.26 | .210 | -0.17 | 0.04 | -.04 |
|  | **Politicization** | **-0.52** | **0.05** | **-0.39** | **-10.14** | **<.001** | **-0.62** | **-0.42** | **-.34** |
|  | **Ideology x Slant** | **0.13** | **0.05** | **0.11** | **2.96** | **.003** | **0.04** | **0.22** | **.10** |
|  | Ideology x Politicization | 0.09 | 0.05 | 0.07 | 2.02 | .044 | 0.00 | 0.18 | .07 |
|  | **Slant x Politicization** | **-0.13** | **0.04** | **-0.10** | **-2.86** | **.004** | **-0.21** | **-0.04** | **-.10** |
|  | 3way | 0.00 | 0.04 | 0.00 | 0.01 | .994 | -0.07 | 0.07 | .00 |
| WHO | (Constant) | 4.02 | 0.05 |  | 85.81 | <.001 | 3.92 | 4.11 |  |
|  | **Participant Ideology** | **-0.58** | **0.05** | **-0.43** | **-12.25** | **<.001** | **-0.67** | **-0.49** | **-.39** |
|  | Slant | -0.04 | 0.05 | -0.03 | -0.73 | .463 | -0.14 | 0.07 | -.02 |
|  | **Politicization** | **-0.30** | **0.05** | **-0.22** | **-6.37** | **<.001** | **-0.39** | **-0.21** | **-.20** |
|  | **Ideology x Slant** | **0.19** | **0.05** | **0.15** | **3.83** | **<.001** | **0.09** | **0.29** | **.12** |
|  | **Ideology x Politicization** | **-0.17** | **0.04** | **-0.13** | **-3.90** | **<.001** | **-0.26** | **-0.09** | **-.12** |
|  | Slant x Politicization | 0.00 | 0.05 | 0.00 | 0.03 | .979 | -0.10 | 0.10 | .00 |
|  | 3way | 0.11 | 0.04 | 0.10 | 2.66 | .008 | 0.03 | 0.19 | .08 |
| Firefighters | (Constant) | 4.95 | 0.03 |  | 154.09 | <.001 | 4.89 | 5.01 |  |
|  | **Participant Ideology** | **0.08** | **0.03** | **0.10** | **2.46** | **.014** | **0.02** | **0.14** | **.10** |
|  | **Slant** | **-0.12** | **0.03** | **-0.14** | **-3.51** | **<.001** | **-0.19** | **-0.05** | **-.14** |
|  | **Politicization** | **-0.12** | **0.03** | **-0.15** | **-3.76** | **<.001** | **-0.19** | **-0.06** | **-.15** |
|  | **Ideology x Slant** | **0.10** | **0.03** | **0.14** | **3.06** | **.002** | **0.03** | **0.16** | **.12** |
|  | Ideology x Politicization | 0.07 | 0.03 | 0.09 | 2.22 | .027 | 0.01 | 0.14 | .09 |
|  | Slant x Politicization | -0.04 | 0.02 | -0.07 | -1.78 | .076 | -0.08 | 0.00 | -.07 |
|  | 3way | 0.02 | 0.02 | 0.06 | 1.17 | .242 | -0.01 | 0.05 | .05 |

**Interactions Between Participant Ideology, Politicization, and Slant on Deference**

We regressed participant ideology, perceived slant, perceived politicization, and all two- and three-way interactions on support and deference. As can be seen in Table S7, participant ideology was a significant predictor of support and deference toward all institutions except for firefighters, such that participants were more willing to support and defer to ideologically congruent institutions, |*r*s| = .25 to .43. Perceived slant significantly predicted support and deference only for police and firefighters and even then with only small effects, *r*s = -.10 to -.11, indicating that an ideological imbalance *alone* has little impact on support and deference. Of most interest to the present investigation, higher perceived politicization consistently predicted lower willingness to support and defer to all six institutions, *r*s = -.10 to -.37.

For judges, police, the WHO, and firefighters, the interaction between participant ideology and perceived slant was also significant, *r*s = .10 to .18, such that greater congruence between participant ideology and institutional slant predicted more willingness to support and defer. These effects were generally small and not found for professors or doctors. The interaction between participant ideology and perceived politicization was significant for all institutions except doctors, although with generally small effects, |*r*s| = .10 to .17. All other interactions were small and inconsistent. Once again, these patterns reflect that both left- and right-leaning participants support both left- and right-leaning institutions less the more they are perceived as politicized.

| **Table S7** |  |  |  |  |  |  |  |  |  |
| --- | --- | --- | --- | --- | --- | --- | --- | --- | --- |
| *Regressing Ideology, Slant, Politicization, and All 2way and 3way Interactions on Deference* | | | | | | | | | |
|  |  |  |  |  |  |  | **95% CI** | |  |
| **Group** |  | ***B*** | ***SE*** | ***Beta*** | ***t*** | ***p*** | **Low** | **High** | ***r*** |
| Professors | (Constant) | 3.81 | 0.04 |  | 107.47 | <.001 | 3.74 | 3.88 |  |
|  | **Participant Ideology** | **-0.49** | **0.04** | **-0.41** | **-13.09** | **<.001** | **-0.57** | **-0.42** | **-.36** |
|  | Slant | 0.03 | 0.04 | 0.03 | 0.78 | .438 | -0.05 | 0.11 | .02 |
|  | **Politicization** | **-0.36** | **0.04** | **-0.31** | **-10.12** | **<.001** | **-0.43** | **-0.29** | **-.28** |
|  | Ideology x Slant | 0.13 | 0.05 | 0.11 | 2.58 | .010 | 0.03 | 0.23 | .07 |
|  | **Ideology x Politicization** | **-0.22** | **0.04** | **-0.19** | **-6.15** | **<.001** | **-0.29** | **-0.15** | **-.17** |
|  | Slant x Politicization | 0.03 | 0.04 | 0.03 | 0.77 | .442 | -0.05 | 0.12 | .02 |
|  | 3way | 0.08 | 0.05 | 0.08 | 1.78 | .075 | -0.01 | 0.18 | .05 |
| Judges | (Constant) | 3.23 | 0.04 |  | 92.64 | <.001 | 3.16 | 3.30 |  |
|  | **Participant Ideology** | **0.28** | **0.04** | **0.28** | **7.82** | **<.001** | **0.21** | **0.35** | **.26** |
|  | Slant | 0.03 | 0.04 | 0.03 | 0.87 | .385 | -0.04 | 0.11 | .03 |
|  | **Politicization** | **-0.41** | **0.04** | **-0.41** | **-11.21** | **<.001** | **-0.48** | **-0.34** | **-.37** |
|  | **Ideology x Slant** | **0.18** | **0.03** | **0.21** | **5.35** | **<.001** | **0.12** | **0.25** | **.18** |
|  | **Ideology x Politicization** | **0.10** | **0.04** | **0.11** | **2.92** | **.004** | **0.03** | **0.17** | **.10** |
|  | Slant x Politicization | -0.02 | 0.04 | -0.03 | -0.62 | .538 | -0.09 | 0.05 | -.02 |
|  | 3way | 0.02 | 0.03 | 0.03 | 0.72 | .469 | -0.04 | 0.08 | .02 |
| Doctors | (Constant) | 4.32 | 0.03 |  | 130.89 | <.001 | 4.26 | 4.39 |  |
|  | **Participant Ideology** | **-0.23** | **0.03** | **-0.25** | **-6.67** | **<.001** | **-0.30** | **-0.16** | **-.25** |
|  | Slant | -0.04 | 0.04 | -0.04 | -1.02 | .306 | -0.11 | 0.04 | -.04 |
|  | **Politicization** | **-0.27** | **0.03** | **-0.31** | **-8.05** | **<.001** | **-0.34** | **-0.21** | **-.30** |
|  | Ideology x Slant | 0.02 | 0.03 | 0.02 | 0.49 | .627 | -0.05 | 0.08 | .02 |
|  | Ideology x Politicization | -0.05 | 0.03 | -0.07 | -1.72 | .085 | -0.11 | 0.01 | -.06 |
|  | Slant x Politicization | -0.03 | 0.03 | -0.06 | -1.26 | .208 | -0.09 | 0.02 | -.05 |
|  | **3way** | **0.07** | **0.02** | **0.16** | **3.36** | **<.001** | **0.03** | **0.11** | **.12** |
| Police | (Constant) | 3.61 | 0.04 |  | 86.21 | <.001 | 3.53 | 3.69 |  |
|  | **Participant Ideology** | **0.37** | **0.04** | **0.32** | **8.89** | **<.001** | **0.29** | **0.46** | **.28** |
|  | **Slant** | **-0.14** | **0.05** | **-0.12** | **-3.01** | **.003** | **-0.23** | **-0.05** | **-.10** |
|  | **Politicization** | **-0.41** | **0.04** | **-0.35** | **-9.41** | **<.001** | **-0.49** | **-0.32** | **-.30** |
|  | **Ideology x Slant** | **0.13** | **0.04** | **0.12** | **3.38** | **<.001** | **0.05** | **0.20** | **.11** |
|  | **Ideology x Politicization** | **0.14** | **0.04** | **0.12** | **3.56** | **<.001** | **0.06** | **0.21** | **.11** |
|  | **Slant x Politicization** | **-0.13** | **0.04** | **-0.13** | **-3.59** | **<.001** | **-0.21** | **-0.06** | **-.11** |
|  | 3way | 0.01 | 0.03 | 0.01 | 0.17 | .865 | -0.06 | 0.07 | .01 |
| WHO | (Constant) | 4.17 | 0.04 |  | 109.28 | <.001 | 4.09 | 4.24 |  |
|  | **Participant Ideology** | **-0.59** | **0.04** | **-0.48** | **-15.15** | **<.001** | **-0.66** | **-0.51** | **-.43** |
|  | Slant | 0.00 | 0.04 | 0.00 | 0.02 | .988 | -0.08 | 0.09 | .00 |
|  | **Politicization** | **-0.32** | **0.04** | **-0.26** | **-8.45** | **<.001** | **-0.40** | **-0.25** | **-.24** |
|  | **Ideology x Slant** | **0.17** | **0.04** | **0.15** | **4.10** | **<.001** | **0.09** | **0.25** | **.12** |
|  | **Ideology x Politicization** | **-0.18** | **0.04** | **-0.15** | **-4.97** | **<.001** | **-0.25** | **-0.11** | **-.14** |
|  | Slant x Politicization | 0.02 | 0.04 | 0.02 | 0.60 | .549 | -0.06 | 0.10 | .02 |
|  | 3way | 0.10 | 0.03 | 0.10 | 3.03 | .003 | 0.04 | 0.17 | .09 |
| Firefighters | (Constant) | 4.76 | 0.03 |  | 171.56 | <.001 | 4.71 | 4.82 |  |
|  | Participant Ideology | -0.05 | 0.03 | -0.08 | -1.89 | .060 | -0.11 | 0.00 | -.07 |
|  | **Slant** | **-0.08** | **0.03** | **-0.12** | **-2.81** | **.005** | **-0.14** | **-0.02** | **-.11** |
|  | **Politicization** | **-0.07** | **0.03** | **-0.10** | **-2.54** | **.011** | **-0.13** | **-0.02** | **-.10** |
|  | **Ideology x Slant** | **0.07** | **0.03** | **0.12** | **2.56** | **.011** | **0.02** | **0.12** | **.10** |
|  | **Ideology x Politicization** | **0.09** | **0.03** | **0.14** | **3.18** | **.002** | **0.03** | **0.14** | **.12** |
|  | Slant x Politicization | -0.04 | 0.02 | -0.09 | -2.20 | .028 | -0.08 | -0.01 | -.09 |
|  | 3way | 0.03 | 0.01 | 0.09 | 1.82 | .070 | 0.00 | 0.05 | .07 |

Note. Bold indicates |*r*| ≥ .10.

**Study 2b All Results**

**Manipulation checks**

First, we conducted single sample *t*-tests of the political slant of each institution against the midpoint of the scale to confirm each was viewed as slanted in the direction we stated. As intended, professors (*M* = 2.19, *SD* = .66) were viewed as left of center and police (*M* = 5.82, *SD* = .66) were judged as right of center, *p*s < .001.

However, once again, our attempted politicization manipulation had only negligible influence on perceived politicization. For police, the ANOVA was marginal, *F*(2, 838) = 2.64, *p* = .072, with a negligible effect size, *η2* = .0006. Simple contrasts showed participants in the politicized condition viewed police as marginally more politicized (*M* = 4.22, *SD* = 1.47) than participants in the control condition (*M* = 3.95, *SD* = 1.45), *p* = .079, but not significantly more politicized than participants in the depoliticized condition (*M* = 4.01, *SD* = 1.40), *p*s = .282. The latter two conditions did not differ, *p* = 1.00. For professors, the ANOVA was significant, *F*(2, 814) = 7.85, *p*<.001, but with a small effect, *η2* = .019. Simple contrasts showed participants in the politicized condition viewed professors as more politicized (*M* = 4.05, *SD* = 1.27) than participants in the control (*M* = 3.62, *SD* = 1.44) and depoliticized conditions (*M* = 3.65, *SD* = 1.33), *p*s<.004, but the latter two conditions did not differ, *p* = 1.00. Because our politicization manipulation was again largely unsuccessful, we report these results in the Supplement only. The manipulation had no impact on trust for either institution, *η2*s < .003, *p*s > .419.

**Trust**

First, we conducted all analyses on the trust outcome variable.

**Correlations.**All correlational results were similar to earlier studies. Higher perceived politicization was once again associated with reduced trust for both professors and police, *r*s = -.47 and -.54, respectively, *p*s<.001. Compared with more leftwing participants, more rightwing participants trusted professors less, *r* = -.52, *p* <.001, and police more, *r* = .62, *p* <.001.

Other correlations were similar to Studies 1 and 2a. The more institutions were perceived as extremely slanted, the more they were viewed as politicized and the less they were viewed as trustworthy: As professors were seen as more left-slanted, the more they were perceived as politicized, *r* = -.11, *p* = .002, and the less they were trusted, *r* = .09, *p* =.012, and the more police were perceived as right-slanted, the more they were perceived as politicized, *r* = .25, *p*<.001, and the less they were trusted, *r* = -.13, *p* <.001. And again, participants tended to see outgroup institutions as more slanted and more politicized: More left-leaning participants perceived police as slanted further right, *r* = -.14, *p*<.001, and more politicized, *r* = -.55, *p*<.001, and more right-leaning participants perceived professors as more politicized, *r* = .47, *p<*.001, but not as significantly more left, *r* = .05, *p*=.181.

**Interactions between participant ideology, perceived politicization, and perceived slant on trust.**As can be seen in Table S8, more rightwing ideology was associated with lower trust toward professors and higher trust toward police. Higher perceived politicization was once again associated with lower trust toward both police and professors.

For both police and professors, the interactions between perceived politicization and ideology were significant, indicating that the negative associations between perceived politicization and trust were weaker for ingroup institutions than outgroup institutions. Nevertheless, among congruent participants, the association between perceived politicization and trust was still negative for police (*r* = -0.21, *p* < 0.001) and negative but with only a small, marginal effect among professors (*r* = -0.09, *p* = 0.097). The other two- and three-way interactions were not significant. The interaction between ideological congruence and perceived politicization on trust is presented in Item E2 Panel B in the Extended Data.

| **Table S8** |  |  |  |  |  |  |  |  |  |
| --- | --- | --- | --- | --- | --- | --- | --- | --- | --- |
| *Regressing Ideology, Slant, Politicization, and All 2way and 3way Interactions on Trust in Study 2b* | | | | | | | | | |
|  |  |  |  |  |  |  | **95% CI** | |  |
| **Group** |  | ***B*** | ***SE*** | ***Beta*** | ***t*** | ***p*** | **Low** | **High** | ***r*** |
| Professors | (Constant) | 3.81 | 0.04 |  | 103.12 | <.001 | 3.74 | 3.89 |  |
|  | **Participant Ideology** | **-0.48** | **0.04** | **-0.39** | **-12.34** | **<.001** | **-0.56** | **-0.40** | **-.34** |
|  | Slant | 0.08 | 0.04 | 0.07 | 1.82 | .070 | -0.01 | 0.16 | .05 |
|  | **Politicization** | **-0.31** | **0.04** | **-0.26** | **-8.20** | **<.001** | **-0.39** | **-0.24** | **-.22** |
|  | Ideology x Slant | 0.07 | 0.04 | 0.06 | 1.68 | .093 | -0.01 | 0.15 | .05 |
|  | **Ideology x Politicization** | **-0.26** | **0.04** | **-0.21** | **-7.47** | **<.001** | **-0.33** | **-0.19** | **-.20** |
|  | Slant x Politicization | 0.10 | 0.04 | 0.09 | 2.46 | .014 | 0.02 | 0.19 | .07 |
|  | 3way | -0.08 | 0.04 | -0.07 | -1.95 | .051 | -0.15 | 0.00 | -.05 |
| Police | (Constant) | 3.46 | 0.04 |  | 80.57 | <.001 | 3.37 | 3.54 |  |
|  | **Participant Ideology** | **0.58** | **0.04** | **0.42** | **13.21** | **<.001** | **0.49** | **0.66** | **.34** |
|  | Slant | 0.02 | 0.04 | 0.01 | 0.40 | .689 | -0.06 | 0.10 | .01 |
|  | **Politicization** | **-0.48** | **0.05** | **-0.33** | **-10.12** | **<.001** | **-0.57** | **-0.38** | **-.26** |
|  | Ideology x Slant | 0.07 | 0.04 | 0.05 | 1.68 | .093 | -0.01 | 0.15 | .04 |
|  | **Ideology x Politicization** | **0.19** | **0.04** | **0.13** | **4.84** | **<.001** | **0.11** | **0.27** | **.12** |
|  | Slant x Politicization | -0.05 | 0.04 | -0.04 | -1.30 | .193 | -0.13 | 0.03 | -.03 |
|  | 3way | 0.03 | 0.04 | 0.02 | 0.76 | .450 | -0.04 | 0.10 | .02 |

**Deference**

***Correlations.*** Higher perceived politicization was again strongly associated with less support and deference toward both organizations, *r*s = -.53 to -.55, *p*s < .001.

Other patterns were similar to those found for trust and deference in Studies 1 and 2. Participants generally reported more support and deference toward institutions they perceived as *less* extremely slanted: Higher perceived rightwing slant was associated with more support and deference toward professors, *r* = .10, *p* = .006, and less support and deference toward police, *r* = -.14, *p* < .001. And again, participants reported greater willingness to support and defer to organizations perceived as slanted toward their own ideology: More right-leaning participants reported less willingness to support and defer to professors, *r* = -.65, *p* < .001, and more willingness to support and defer to police, *r* = .67, *p* < .001.

**Interactions between participant ideology, perceived politicization, and perceived slant on deference.**As can be seen in Table S9 and Item E2, the support/deference results were nearly identical to the trust results. More rightwing participants reported lower support and deference toward professors and higher support and deference toward police (compared to more leftwing participants). And higher perceived politicization was again associated with lower support and deference toward both police and professors.

For both police and professors, the interactions between perceived politicization and ideology were significant, again indicating a weaker relationship between perceived politicization and support and deference toward ingroup (vs. outgroup) institutions. Among participants who had congruent ideology, the relationship between politicization and deference was still negative for police (*r* = -0.18, *p* = 0.002) and professors (*r* = -0.11, *p* = 0.043).

| **Table S9** |  |  |  |  |  |  |  |  |  |
| --- | --- | --- | --- | --- | --- | --- | --- | --- | --- |
| *Regressing Ideology, Slant, Politicization, and All 2way and 3way Interactions on Support/Deference* | | | | | | | | | |
|  |  |  |  |  |  |  | **95% CI** | |  |
| **Group** |  | ***B*** | ***SE*** | ***Beta*** | ***t*** | ***p*** | **Low** | **High** | ***r*** |
| Professors | (Constant) | 3.64 | 0.03 |  | 112.52 | <.001 | 3.57 | 3.70 |  |
|  | **Participant Ideology** | **-0.65** | **0.03** | **-0.53** | **-19.23** | **<.001** | **-0.72** | **-0.59** | **-.46** |
|  | Slant | 0.09 | 0.04 | 0.08 | 2.42 | .016 | 0.02 | 0.16 | .06 |
|  | **Politicization** | **-0.30** | **0.03** | **-0.25** | **-8.94** | **<.001** | **-0.36** | **-0.23** | **-.21** |
|  | Ideology x Slant | 0.07 | 0.04 | 0.06 | 2.01 | .045 | 0.00 | 0.15 | .05 |
|  | **Ideology x Politicization** | **-0.24** | **0.03** | **-0.19** | **-7.92** | **<.001** | **-0.30** | **-0.18** | **-.19** |
|  | Slant x Politicization | 0.12 | 0.04 | 0.10 | 3.34 | <.001 | 0.05 | 0.19 | .08 |
|  | 3way | -0.07 | 0.03 | -0.06 | -1.97 | .049 | -0.13 | 0.00 | -.05 |
| Police | (Constant) | 3.51 | 0.04 |  | 100.93 | <.001 | 3.44 | 3.58 |  |
|  | **Participant Ideology** | **0.57** | **0.04** | **0.47** | **15.98** | **<.001** | **0.50** | **0.64** | **.38** |
|  | Slant | 0.01 | 0.03 | 0.01 | 0.28 | .777 | -0.06 | 0.08 | .01 |
|  | **Politicization** | **-0.39** | **0.04** | **-0.32** | **-10.28** | **<.001** | **-0.47** | **-0.32** | **-.25** |
|  | Ideology x Slant | 0.09 | 0.03 | 0.08 | 2.83 | .005 | 0.03 | 0.16 | .07 |
|  | **Ideology x Politicization** | **0.20** | **0.03** | **0.16** | **6.30** | **<.001** | **0.14** | **0.26** | **.15** |
|  | Slant x Politicization | -0.01 | 0.03 | -0.01 | -0.29 | .775 | -0.07 | 0.05 | -.01 |
|  | 3way | 0.00 | 0.03 | 0.00 | -0.02 | .981 | -0.06 | 0.06 | .00 |

**Manipulation and Trust**

We conducted two one-way ANOVAs testing whether the (failed) politicization manipulation impacted trust. The manipulation similarly had no impact on trust either institution, *η2*s < .003, *p*s > .419.

We also analyzed the interaction between the manipulation and participant ideology on trust. For professors, only more leftwing participant ideology predicted greater trust, semipartial *r* = -.52, *p*<.001. For police, participant ideology and the interaction between condition and participant ideology significantly predicted trust, *p*s<.003, however the size of the interaction did not meet the minimum threshold for a small effect, |*r*| < .09. More rightwing ideology did strongly predict more trust toward police, *r* = .62.

**Manipulation and Deference**

Because the manipulation failed to manipulate perceived politicization and had no impact on perceived trust, we do not fully report the ANOVAs testing the influence of the manipulation on support and deference, but there were no significant effects, *η2*s < .006, *p*s > .123.

In regressions testing the main effects and interaction of the manipulation and participant ideology on support and deference, only more leftwing participant ideology predicted greater support and deference toward professors, semipartial *r* = -.66, *p*<.001. For police, both participant ideology and the interaction between participant ideology and the condition were significant, *p*s<.001, however the interaction effect was small, *r* = .11, whereas more rightwing ideology strongly predicted more support and deference toward police, *r* = .67.

**Study 3 Full Results**

**Manipulation Check**

Our manipulation was successful. Participants in the Biden (*M* = 4.01, *SD* = 1.31) and Trump (*M* = 4.19, *SD* = 1.44) conditions viewed *Get Outdoors* as more politicized than those in the control condition (*M* = 2.54, *SD* = 1.43), *F*(2, 609) = 86.56, *p*<.001. The control condition significantly differed from the other two conditions, *p*<.001, and the two politicized conditions did not differ from one another, *p* = .636.

**Main Effects of Experimental Manipulation**

The main effects of the experimental manipulation are presented fully in the main text and Item E3 in the Extended Data, and so we do not discuss them again here.

**Interactions with Ideology**

We next tested the interactions between *Z*-scored participant ideology and dummy-coded condition variables in four regressions. As displayed in Item E4 in the Extended Data and Figure 2 Panel A in the main text, only participant ideology was not a significant predictor of trust and support/deference toward *Get Outdoors* and rangers in general. The Trump and Biden dummy variables consistently had medium to large negative effects on all outcome variables. The one exception again was the Biden dummy effect on trust toward all rangers, which was still significant but small. In contrast, the interactions with ideology, although generally significant, had smaller effects, not reaching Cohen’s standards for a “small” effect in five out of eight cases, indicating that—although outgroup endorsements harm trust and support/deference *more* than ingroup endorsements, endorsements have a negative effect regardless of ideological alignment.

Figure 2 Panel A in the main text shows that the damaging effects of political endorsements mostly diminish at the extreme ends of political ideology (among those on the far left or far right), but for the vast majority of people, political endorsements of any kind had negative impacts on trust and support and deference toward *Get Outdoors* and park rangers *in general.*

**Interactions with Candidate Preference**

To address the possibility that these effects were driven by the ideologically aligned who dislike their candidate (i.e., conservatives who dislike Trump and liberals who dislike Biden), we ran a 3 (Trump supporter [n=113], Biden supporter [n=362], Neither supporter [n=133]) x 3 (Trump condition, Biden condition, Control) MANOVA on all continuous outcomes. As displayed in Item E5 in the Extended Data, all main effects and interactions were statistically significant, such that political endorsements (vs. control) always had a deleterious effect on trust and support and deference toward both *Get Outdoors* and park rangers in general, but endorsements of opposing candidates had more deleterious effects. The effects were generally smaller for all rangers compared to *Get Outdoors*, and ingroup candidate endorsement did not have significant effects on trust toward park rangers in general, but across all combinations, the effects were consistently negative.

Last, we added a candidate support layer to a crosstabs analysis to test for differences in donation voting behavior between conditions among Trump supporters, Biden supporters, and participants who supported neither Trump nor Biden (non-supporters). Among Trump supporters, Biden supporters, and non-supporters, donations to *Get Outdoors* were highest in the control condition. When *Get Outdoors* made a political endorsement of *any kind* (preferred candidate or not), votes shifted away from *Get Outdoors* and toward two organizations that participants had never even heard of. Indeed, this downshift in votes away from *Get Outdoors* (total votes = 43.1%) toward *Firefighters for Community Risk Prevention* (total votes = 45.6%) changed the overall “winner,” resulting in the research team donating $100 to a local fire department instead of to a national park. The interaction between the experimental condition and voting behavior was significant for Trump supporters, χ2 = 19.39, *p*<.001 and Biden supporters, χ2 = 70.54, *p*<.001, such that they were more offput by the endorsement of their opposing candidate, and smaller but still significant for non-supporters, χ2 = 10.09, *p* = .039, who were more offput by the Trump endorsement. See Figure 2 Panel B in the main text.

**Study 4 Full Results**

**Descriptives**

Table S10 displays descriptives for all main variables. Disciplines that were perceived as low in politicization (e.g., information technology, computer science, engineering, chemistry, and mathematics) tended to be viewed as more trustworthy, less skepticism-worthy, more ideologically balanced, and lower in appropriateness of politicization. Disciplines that were perceived as high in politicization (e.g., gender studies, political science, ethnic studies, religious studies, criminal justice) tended to be viewed as less trustworthy, more skepticism-worthy, and higher in appropriateness of politicization. Perceived appropriateness of politicization was low across the board, with politicization rated as the most appropriate in Political Science (*M* = 2.96), but still significantly below the midpoint (3.5), *t*(436) = -5.54, *p*<.001.

| **Table S10.** *All Descriptives for Study 4* | | |  |  |  |  |  |  |  |  |  |
| --- | --- | --- | --- | --- | --- | --- | --- | --- | --- | --- | --- |
|  |  | **Slant** | | **Politicization** | | **Trust** | | **Skepticism** | | **Appropriate**  **-ness** | |
|  | **n** | **M** | **SD** | **M** | **SD** | **M** | **SD** | **M** | **SD** | **M** | **SD** |
| Women's and Gender Studies | 441 | 19.28 | 19.74 | 4.62 | 1.31 | 3.71 | 1.70 | 3.92 | 1.97 | 2.57 | 1.88 |
| Political Science | 437 | 45.08 | 19.20 | 4.43 | 1.31 | 3.33 | 1.45 | 4.67 | 1.58 | 2.96 | 2.04 |
| Ethnic Studies | 437 | 27.59 | 20.21 | 4.11 | 1.36 | 3.68 | 1.52 | 4.30 | 1.57 | 2.41 | 1.72 |
| Religious Studies | 437 | 64.94 | 19.28 | 4.09 | 1.37 | 3.34 | 1.47 | 4.74 | 1.59 | 2.22 | 1.66 |
| Criminal Justice | 441 | 51.43 | 19.07 | 3.95 | 1.26 | 3.76 | 1.48 | 3.76 | 1.80 | 2.07 | 1.60 |
| Social Work | 437 | 30.47 | 19.45 | 3.92 | 1.37 | 3.94 | 1.50 | 4.00 | 1.49 | 2.47 | 1.73 |
| Business | 441 | 60.41 | 17.01 | 3.79 | 1.28 | 3.68 | 1.45 | 3.54 | 1.73 | 2.01 | 1.46 |
| Economics | 441 | 56.68 | 17.42 | 3.77 | 1.25 | 3.93 | 1.37 | 3.42 | 1.72 | 2.11 | 1.58 |
| Environmental Science | 436 | 28.74 | 19.54 | 3.76 | 1.43 | 4.13 | 1.62 | 3.76 | 1.51 | 2.20 | 1.61 |
| Education | 441 | 37.15 | 19.69 | 3.75 | 1.46 | 4.05 | 1.55 | 3.51 | 1.84 | 1.97 | 1.43 |
| Sociology | 437 | 34.30 | 18.66 | 3.73 | 1.36 | 3.73 | 1.41 | 4.14 | 1.48 | 2.41 | 1.64 |
| Public Health | 441 | 38.85 | 18.36 | 3.56 | 1.39 | 4.10 | 1.48 | 3.29 | 1.75 | 2.00 | 1.53 |
| History | 441 | 45.83 | 18.19 | 3.55 | 1.37 | 4.11 | 1.40 | 3.54 | 1.76 | 2.03 | 1.51 |
| Philosophy | 437 | 37.50 | 19.08 | 3.52 | 1.38 | 3.80 | 1.43 | 4.28 | 1.46 | 2.29 | 1.59 |
| Psychology | 441 | 36.66 | 18.00 | 3.32 | 1.47 | 3.96 | 1.48 | 3.56 | 1.78 | 1.94 | 1.46 |
| Communications | 437 | 42.74 | 16.07 | 3.21 | 1.37 | 3.75 | 1.31 | 3.80 | 1.43 | 2.12 | 1.50 |
| Art and Art History | 436 | 32.81 | 19.34 | 3.14 | 1.45 | 4.04 | 1.44 | 3.60 | 1.47 | 2.06 | 1.50 |
| English Language and Literature | 441 | 37.37 | 18.43 | 3.13 | 1.42 | 4.25 | 1.42 | 2.84 | 1.64 | 1.97 | 1.47 |
| Earth and Planetary Sciences | 441 | 36.71 | 17.79 | 2.96 | 1.43 | 4.56 | 1.47 | 2.70 | 1.63 | 1.85 | 1.45 |
| Anthropology | 437 | 39.17 | 17.41 | 2.86 | 1.45 | 4.03 | 1.40 | 3.61 | 1.42 | 1.96 | 1.43 |
| Foreign Languages and Literatures | 441 | 36.79 | 16.23 | 2.81 | 1.36 | 4.21 | 1.39 | 2.67 | 1.60 | 1.91 | 1.42 |
| Nursing | 441 | 44.44 | 14.78 | 2.72 | 1.36 | 4.62 | 1.40 | 2.47 | 1.54 | 1.71 | 1.31 |
| Biology | 437 | 42.41 | 16.78 | 2.71 | 1.37 | 4.48 | 1.39 | 3.28 | 1.39 | 1.76 | 1.39 |
| Music | 437 | 36.59 | 17.91 | 2.62 | 1.39 | 4.21 | 1.43 | 3.29 | 1.34 | 1.96 | 1.52 |
| Information Technology | 441 | 47.24 | 15.23 | 2.62 | 1.38 | 4.43 | 1.33 | 2.69 | 1.65 | 1.74 | 1.31 |
| Computer Science | 437 | 46.96 | 15.60 | 2.41 | 1.39 | 4.57 | 1.32 | 3.08 | 1.33 | 1.76 | 1.41 |
| Engineering | 440 | 52.87 | 14.06 | 2.35 | 1.32 | 4.75 | 1.27 | 2.29 | 1.45 | 1.69 | 1.30 |
| Physics | 441 | 44.94 | 16.21 | 2.34 | 1.35 | 4.81 | 1.39 | 2.37 | 1.53 | 1.66 | 1.34 |
| Chemistry | 437 | 45.96 | 14.83 | 2.27 | 1.32 | 4.60 | 1.35 | 3.03 | 1.31 | 1.66 | 1.24 |
| Mathematics | 437 | 49.58 | 15.40 | 2.14 | 1.36 | 4.77 | 1.39 | 2.95 | 1.28 | 1.65 | 1.28 |

**Correlations**

Supplemental Table S11 displays all correlations between all variables for all 30 disciplines. Higher perceived politicization was associated with lower trust, *r*s = -.160 to -.371, and higher skepticism across all 30 disciplines, *r*s = .244 to .482, all *ps*<.001, indicating that politicization also may be reputationally costly for academic disciplines.

Perceived politicization was not consistently directionally related to slant and tended to be positively associated with appropriateness of politicization as well as more right-leaning participant ideology. For 17/30 disciplines, higher perceived right-leaning slant was associated with more trust, and for 12/30, higher perceived right-leaning slant was associated with less skepticism. These patterns tended to be observed for disciplines perceived as highly left-leaning, indicating once again that participants who perceive left-leaning disciplines as *less* left-leaning, tend to trust them more and have less skepticism toward them. For 23/30 disciplines, more left-leaning ideology among respondents was associated with higher trust, and for 24/30, with lower skepticism. These likely reflect the relationships between ideological alignment (because most disciplines are viewed as left-leaning) and trust and skepticism.

| **Table S11.** *Correlations Between All Variables in Study 4 With Academic Disciplines* | | | | | | | | | |  |  |  |  |  |  |  |
| --- | --- | --- | --- | --- | --- | --- | --- | --- | --- | --- | --- | --- | --- | --- | --- | --- |
|  |  | **Politicization &** | | | | | **Slant &** | | | | **Trust &** | | | **Skept &** | | **App &** |
|  |  | **Slant** | **Trust** | **Skept** | **App** | **Ps Ideo** | **Trust** | **Skept** | **App** | **Ps Ideo** | **Skept** | **App** | **Ps Ideo** | **App** | **Ps Ideo** | **Ps Ideo** |
| Anthropology | *r* | -.233 | -.347 | .429 | .230 | .204 | .201 | -.177 | .124 | .000 | -.404 | .085 | -.298 | .160 | .164 | -.099 |
|  | *p* | <.001 | <.001 | <.001 | <.001 | <.001 | <.001 | <.001 | .010 | .997 | <.001 | .076 | <.001 | <.001 | <.001 | .038 |
| Environmental Science | *r* | -.317 | -.338 | .429 | .154 | .242 | .174 | -.177 | .137 | .034 | -.451 | .157 | -.485 | .041 | .317 | -.163 |
|  | *p* | <.001 | <.001 | <.001 | .001 | <.001 | <.001 | <.001 | .004 | .481 | <.001 | .001 | <.001 | .389 | <.001 | <.001 |
| Communications | *r* | -.080 | -.260 | .388 | .208 | .242 | .198 | -.091 | .201 | -.059 | -.333 | .210 | -.231 | .157 | .149 | -.075 |
|  | *p* | .095 | <.001 | <.001 | <.001 | <.001 | <.001 | .057 | <.001 | .217 | <.001 | <.001 | <.001 | <.001 | .002 | .119 |
| Music | *r* | -.068 | -.274 | .337 | .282 | .231 | .175 | -.089 | .172 | -.040 | -.249 | .072 | -.253 | .323 | .168 | -.074 |
|  | *p* | .154 | <.001 | <.001 | <.001 | <.001 | <.001 | .063 | <.001 | .407 | <.001 | .133 | <.001 | <.001 | <.001 | .125 |
| Political Science | *r* | -.043 | -.354 | .349 | .178 | .119 | .191 | -.160 | .107 | -.124 | -.437 | .099 | -.262 | .161 | .173 | -.126 |
|  | *p* | .365 | <.001 | <.001 | <.001 | .013 | <.001 | <.001 | .025 | .010 | <.001 | .038 | <.001 | <.001 | <.001 | .008 |
| Mathematics | *r* | .195 | -.210 | .438 | .468 | .246 | .097 | .031 | .202 | .084 | -.177 | -.073 | -.117 | .383 | .079 | .020 |
|  | *p* | <.001 | <.001 | <.001 | <.001 | <.001 | .043 | .514 | <.001 | .078 | <.001 | .126 | .014 | <.001 | .099 | .684 |
| Chemistry | *r* | .018 | -.232 | .357 | .395 | .320 | .089 | .024 | .164 | .051 | -.213 | -.020 | -.172 | .347 | .150 | .017 |
|  | *p* | .703 | <.001 | <.001 | <.001 | <.001 | .062 | .621 | <.001 | .288 | <.001 | .683 | <.001 | <.001 | .002 | .728 |
| Computer Science | *r* | .073 | -.242 | .368 | .354 | .245 | .052 | .075 | .173 | .076 | -.218 | -.024 | -.122 | .392 | .149 | -.018 |
|  | *p* | .129 | <.001 | <.001 | <.001 | <.001 | .274 | .115 | <.001 | .113 | <.001 | .613 | .011 | <.001 | .002 | .703 |
| Philosophy | *r* | -.179 | -.292 | .373 | .238 | .168 | .203 | -.197 | .116 | .007 | -.401 | .099 | -.258 | .186 | .127 | -.122 |
|  | *p* | <.001 | <.001 | <.001 | <.001 | <.001 | <.001 | <.001 | .015 | .881 | <.001 | .039 | <.001 | <.001 | .008 | .011 |
| Biology | *r* | .002 | -.285 | .351 | .286 | .313 | .077 | -.011 | .185 | .106 | -.314 | .002 | -.267 | .286 | .193 | -.012 |
|  | *p* | .974 | <.001 | <.001 | <.001 | <.001 | .110 | .811 | <.001 | .027 | <.001 | .975 | <.001 | <.001 | <.001 | .803 |
| Sociology | *r* | -.203 | -.335 | .470 | .126 | .293 | .326 | -.198 | .202 | -.063 | -.432 | .288 | -.428 | .119 | .280 | -.161 |
|  | *p* | <.001 | <.001 | <.001 | .009 | <.001 | <.001 | <.001 | <.001 | .186 | <.001 | <.001 | <.001 | .013 | <.001 | <.001 |
| Art/Art History | *r* | -.206 | -.323 | .390 | .208 | .286 | .178 | -.101 | .099 | .006 | -.312 | .128 | -.315 | .183 | .176 | -.158 |
|  | *p* | <.001 | <.001 | <.001 | <.001 | <.001 | <.001 | .036 | .039 | .899 | <.001 | .008 | <.001 | <.001 | <.001 | <.001 |
| Ethnic Studies | *r* | -.308 | -.371 | .482 | .140 | .233 | .298 | -.211 | .137 | .080 | -.521 | .201 | -.442 | .091 | .325 | -.135 |
|  | *p* | <.001 | <.001 | <.001 | .003 | <.001 | <.001 | <.001 | .004 | .093 | <.001 | <.001 | <.001 | .059 | <.001 | .005 |
| Relig Studies | *r* | .306 | -.177 | .244 | .214 | -.010 | -.095 | .100 | .090 | -.025 | -.419 | .127 | .143 | .031 | -.103 | .007 |
|  | *p* | <.001 | <.001 | <.001 | <.001 | .836 | .048 | .036 | .059 | .609 | <.001 | .008 | .003 | .515 | .032 | .885 |
| Social Work | *r* | -.344 | -.324 | .401 | .166 | .232 | .212 | -.183 | .070 | .016 | -.482 | .306 | -.424 | .027 | .309 | -.232 |
|  | *p* | <.001 | <.001 | <.001 | <.001 | <.001 | <.001 | <.001 | .143 | .743 | <.001 | <.001 | <.001 | .569 | <.001 | <.001 |
| Education | *r* | -.259 | -.357 | .441 | .086 | .249 | .253 | -.206 | .170 | -.027 | -.448 | .205 | -.298 | .032 | .236 | -.043 |
|  | *p* | <.001 | <.001 | <.001 | .071 | <.001 | <.001 | <.001 | <.001 | .567 | <.001 | <.001 | <.001 | .500 | <.001 | .370 |
| Foreign Languages | *r* | -.019 | -.172 | .405 | .343 | .254 | .158 | -.048 | .237 | .100 | -.301 | .139 | -.262 | .184 | .188 | .031 |
|  | *p* | .687 | <.001 | <.001 | <.001 | <.001 | <.001 | .310 | <.001 | .036 | <.001 | .003 | <.001 | <.001 | <.001 | .517 |
| Psychology | *r* | -.149 | -.268 | .316 | .264 | .240 | .205 | -.145 | .247 | .144 | -.401 | .192 | -.242 | .025 | .145 | .068 |
|  | *p* | .002 | <.001 | <.001 | <.001 | <.001 | <.001 | .002 | <.001 | .003 | <.001 | <.001 | <.001 | .606 | .002 | .154 |
| Economics | *r* | .131 | -.172 | .309 | .187 | .023 | .072 | .070 | .116 | -.134 | -.343 | .204 | .048 | .085 | -.046 | .017 |
|  | *p* | .006 | <.001 | <.001 | <.001 | .632 | .132 | .143 | .015 | .005 | <.001 | <.001 | .317 | .076 | .331 | .726 |
| Engineering | *r* | .170 | -.176 | .357 | .420 | .174 | .082 | .017 | .069 | .189 | -.280 | .026 | .003 | .267 | .119 | .164 |
|  | *p* | <.001 | <.001 | <.001 | <.001 | <.001 | .085 | .727 | .146 | <.001 | <.001 | .582 | .943 | <.001 | .012 | <.001 |
| Business | *r* | .277 | -.160 | .266 | .210 | -.065 | -.073 | .170 | .071 | -.188 | -.276 | .200 | .217 | .116 | -.151 | .033 |
|  | *p* | <.001 | <.001 | <.001 | <.001 | .176 | .124 | <.001 | .138 | <.001 | <.001 | <.001 | <.001 | .015 | .002 | .493 |
| Physics | *r* | .116 | -.230 | .411 | .450 | .177 | -.010 | .066 | .176 | .200 | -.250 | -.009 | -.110 | .300 | .162 | .144 |
|  | *p* | .015 | <.001 | <.001 | <.001 | <.001 | .826 | .165 | <.001 | <.001 | <.001 | .850 | .021 | <.001 | <.001 | .002 |
| History | *r* | -.060 | -.314 | .432 | .209 | .233 | .146 | -.031 | .124 | -.023 | -.395 | .177 | -.224 | .130 | .172 | -.005 |
|  | *p* | .209 | <.001 | <.001 | <.001 | <.001 | .002 | .519 | .009 | .633 | <.001 | <.001 | <.001 | .006 | <.001 | .913 |
| Earth & Planetary Science | *r* | -.117 | -.253 | .415 | .305 | .216 | .058 | .002 | .199 | .164 | -.358 | .098 | -.280 | .177 | .237 | .030 |
|  | *p* | .014 | <.001 | <.001 | <.001 | <.001 | .223 | .959 | <.001 | <.001 | <.001 | .039 | <.001 | <.001 | <.001 | .532 |
| Public Health | *r* | -.099 | -.298 | .436 | .201 | .251 | .241 | -.095 | .153 | .029 | -.418 | .259 | -.273 | .075 | .262 | -.035 |
|  | *p* | .037 | <.001 | <.001 | <.001 | <.001 | <.001 | .047 | .001 | .548 | <.001 | <.001 | <.001 | .116 | <.001 | .463 |
| Criminal Justice | *r* | .037 | -.290 | .378 | .139 | .046 | .015 | .057 | .006 | -.129 | -.447 | .137 | -.063 | .081 | -.037 | -.014 |
|  | *p* | .438 | <.001 | <.001 | .003 | .331 | .749 | .236 | .893 | .007 | <.001 | .004 | .189 | .089 | .433 | .762 |
| Gender Studies | *r* | -.325 | -.340 | .445 | .117 | .239 | .299 | -.216 | .122 | .115 | -.573 | .257 | -.475 | -.097 | .393 | -.165 |
|  | *p* | <.001 | <.001 | <.001 | .014 | <.001 | <.001 | <.001 | .010 | .015 | <.001 | <.001 | <.001 | .042 | <.001 | <.001 |
| English Lang & Lit | *r* | -.196 | -.218 | .392 | .194 | .253 | .205 | -.157 | .109 | -.017 | -.301 | .174 | -.266 | .222 | .179 | -.015 |
|  | *p* | <.001 | <.001 | <.001 | <.001 | <.001 | <.001 | <.001 | .022 | .718 | <.001 | <.001 | <.001 | <.001 | <.001 | .756 |
| Information Tech | *r* | .078 | -.213 | .427 | .410 | .191 | .094 | .023 | .238 | .133 | -.284 | .116 | -.024 | .212 | .077 | .114 |
|  | *p* | .101 | <.001 | <.001 | <.001 | <.001 | .050 | .631 | <.001 | .005 | <.001 | .015 | .617 | <.001 | .105 | .016 |

**Discipline-level Correlations Between Slant, Politicization, Trust, and Skepticism**

As can be seen in Figure 3 in the main text, disciplines perceived as more politicized were trusted much less (*r* = -0.88, *p* < 0.001, 95% CI = [-0.94, -0.76]) and were far more likely to elicit skepticism (r = 0.80, p < 0.001, 95% CI = [0.62, 0.90]). In contrast, disciplines that were perceived as leaning more to the left or right were similarly trusted (r = 0.05, p = 0.776, 95% CI = [-0.31, 0. 41]) and similarly likely to be perceived as warranting skepticism (r = -0.13, p = 0.489, 95% CI = [-0.47, 0.24]).

**Interactions Between Participant Ideology, Slant, and Politicization on Trust and Skepticism**

As can be seen in Supplemental Table S12 below, Figure 4 in the main text, and Item E7 in the Extended Data, politicization consistently predicted lower trust and higher skepticism across all 30 disciplines. The one exception was for trust toward Religious Studies, but this was still in the same direction and statistically significant, *r* = -.097, *p* = .027, but did not quite hit our minimum threshold of |*r|* *≥* .10. Perceived slant (more right-leaning) alone predicted higher trust for only four (highly left-leaning) disciplines and did not predict skepticism.

The interactions between participant ideology and politicization reached the minimum threshold for trust only in environmental science and mathematics and for skepticism only in music and art. Although these interactions were rare and small, Figure 4 in the main text and Item E7 in the Extended Data clearly show that more ideological alignment was consistently associated with weaker negative relationships between politicization and trust and weaker positive relationships between politicization and skepticism. Nonetheless, slopes tended to be in the same direction (Figure 4 Panel B in the main text): perceived politicization was generally associated with lower trust and higher skepticism *regardless* of participants’ ideological alignment with the disciplines.

The effects of politicization were by far the most consistent effects across disciplines and outcomes, but there were some other semi-consistent effects. More right-leaning ideology often (20/30) predicted lower trust, and less often (8/30), more skepticism. Although scholars often portray conservatives as more skeptical of science and higher education in general, conservatism was a less reliable predictor of trust and skepticism than perceived politicization.

The interaction between participant ideology and perceived slant often (23/30) met a minimum threshold for trust, and less often (5/30), for skepticism, such that more perceived ideological alignment tended to predict more positive attitudes. But again, this alignment was a less reliable predictor than perceived politicization.

The two-way interactions between participant ideology and politicization and slant and politicization rarely met |rs| ≥ .10. The three-way interaction met this threshold only once for trust but ten times for skepticism.

| **Table S12.** *Interactions Between Participant Ideology, Perceived Slant, and Perceived Politicization on Trust (Full Regression Results) And Skepticism (Semipartial rs Only) For All Academic Disciplines* | | | | | | | | | |
| --- | --- | --- | --- | --- | --- | --- | --- | --- | --- |
|  | **Trust** | | | | | | | | **Skepticism** |
|  |  |  |  |  |  | 95% CI | | Semipartial | Semipartial |
|  | *B* | *SE* | *Beta* | *t* | *p* | *Low* | *High* | *r* | *r* |
| **Anthropology** | |  |  |  |  |  |  |  |  |
| (Constant) | 4.07 | .06 |  | 66.93 | <.001 | 3.95 | 4.19 |  |  |
| Ps Ideology | -0.28 | .06 | -.20 | -4.61 | <.001 | -0.40 | -0.16 | -.192 | .048 |
| Slant | 0.10 | .07 | .07 | 1.47 | .142 | -0.03 | 0.22 | .061 | -.045 |
| Politicization | -0.31 | .06 | -.22 | -5.05 | <.001 | -0.44 | -0.19 | -.210 | .344 |
| IdeoXSlant | 0.25 | .06 | .20 | 4.12 | <.001 | 0.13 | 0.37 | .171 | -.088 |
| IdeoXPolit | -0.09 | .06 | -.07 | -1.52 | .130 | -0.21 | 0.03 | -.063 | .040 |
| SlantXPolit | 0.00 | .06 | .00 | 0.01 | .996 | -0.11 | 0.11 | .000 | .046 |
| 3way | 0.09 | .05 | .09 | 1.72 | .086 | -0.01 | 0.18 | .072 | -.109 |
| **Environmental Science** | |  |  |  |  |  |  |  |  |
| (Constant) | 4.26 | .07 |  | 61.53 | <.001 | 4.13 | 4.40 |  |  |
| Ps Ideology | -0.58 | .07 | -.37 | -8.24 | <.001 | -0.72 | -0.44 | -.314 | .113 |
| Slant | 0.04 | .07 | .02 | 0.49 | .624 | -0.11 | 0.18 | .019 | .014 |
| Politicization | -0.26 | .07 | -.16 | -3.78 | <.001 | -0.40 | -0.13 | -.144 | .311 |
| IdeoXSlant | 0.18 | .07 | .12 | 2.68 | .008 | 0.05 | 0.31 | .102 | -.054 |
| IdeoXPolit | -0.25 | .06 | -.17 | -3.93 | <.001 | -0.38 | -0.13 | -.150 | .054 |
| SlantXPolit | 0.20 | .07 | .13 | 3.09 | .002 | 0.07 | 0.33 | .118 | -.025 |
| 3way | 0.02 | .06 | .02 | 0.40 | .687 | -0.09 | 0.13 | .015 | -.180 |
| **Communications** | |  |  |  |  |  |  |  |  |
| (Constant) | 3.78 | .06 |  | 64.87 | <.001 | 3.67 | 3.90 |  |  |
| Ps Ideology | -0.19 | .06 | -.15 | -3.33 | <.001 | -0.31 | -0.08 | -.145 | .044 |
| Slant | 0.05 | .07 | .04 | 0.70 | .485 | -0.09 | 0.18 | .030 | -.011 |
| Politicization | -0.26 | .06 | -.20 | -4.30 | <.001 | -0.38 | -0.14 | -.187 | .340 |
| IdeoXSlant | 0.22 | .06 | .21 | 3.71 | <.001 | 0.10 | 0.34 | .162 | -.047 |
| IdeoXPolit | -0.04 | .05 | -.04 | -0.84 | .401 | -0.15 | 0.06 | -.037 | .046 |
| SlantXPolit | 0.14 | .06 | .14 | 2.31 | .021 | 0.02 | 0.26 | .101 | -.011 |
| 3way | -0.03 | .05 | -.04 | -0.55 | .581 | -0.11 | 0.06 | -.024 | -.023 |
| **Music** |  |  |  |  |  |  |  |  |  |
| (Constant) | 4.25 | .06 |  | 66.98 | <.001 | 4.13 | 4.38 |  |  |
| Ps Ideology | -0.24 | .06 | -.17 | -3.75 | <.001 | -0.36 | -0.11 | -.162 | .076 |
| Slant | 0.09 | .07 | .07 | 1.39 | .166 | -0.04 | 0.23 | .060 | -.043 |
| Politicization | -0.25 | .07 | -.18 | -3.87 | <.001 | -0.38 | -0.12 | -.167 | .280 |
| IdeoXSlant | 0.28 | .07 | .22 | 4.21 | <.001 | 0.15 | 0.41 | .182 | .005 |
| IdeoXPolit | -0.09 | .06 | -.07 | -1.47 | .142 | -0.21 | 0.03 | -.063 | .111 |
| SlantXPolit | 0.02 | .06 | .01 | 0.28 | .777 | -0.09 | 0.13 | .012 | .038 |
| 3way | 0.06 | .05 | .06 | 1.15 | .251 | -0.04 | 0.16 | .050 | -.046 |
| **Political Science** | |  |  |  |  |  |  |  |  |
| (Constant) | 3.39 | .06 |  | 54.75 | <.001 | 3.27 | 3.51 |  |  |
| Ps Ideology | -0.24 | .06 | -.17 | -3.92 | <.001 | -0.36 | -0.12 | -.164 | .093 |
| Slant | 0.08 | .07 | .06 | 1.17 | .243 | -0.06 | 0.22 | .049 | -.059 |
| Politicization | -0.42 | .06 | -.29 | -6.74 | <.001 | -0.55 | -0.30 | -.282 | .295 |
| IdeoXSlant | 0.29 | .06 | .22 | 4.53 | <.001 | 0.17 | 0.42 | .190 | -.151 |
| IdeoXPolit | -0.08 | .07 | -.05 | -1.16 | .245 | -0.20 | 0.05 | -.049 | .002 |
| SlantXPolit | -0.02 | .07 | -.02 | -0.36 | .716 | -0.16 | 0.11 | -.015 | .050 |
| 3way | 0.04 | .06 | .03 | 0.63 | .527 | -0.08 | 0.16 | .027 | -.044 |
| **Mathematics** |  |  |  |  |  |  |  |  |  |
| (Constant) | 4.80 | .07 |  | 72.95 | <.001 | 4.67 | 4.93 |  |  |
| Ps Ideology | -0.08 | .07 | -.06 | -1.21 | .226 | -0.21 | 0.05 | -.055 | -.015 |
| Slant | 0.11 | .07 | .08 | 1.47 | .142 | -0.04 | 0.25 | .067 | -.042 |
| Politicization | -0.29 | .07 | -.21 | -4.08 | <.001 | -0.42 | -0.15 | -.186 | .427 |
| IdeoXSlant | 0.04 | .06 | .03 | 0.56 | .578 | -0.09 | 0.16 | .025 | .075 |
| IdeoXPolit | -0.21 | .06 | -.16 | -3.36 | <.001 | -0.32 | -0.09 | -.153 | -.034 |
| SlantXPolit | 0.12 | .05 | .13 | 2.25 | .025 | 0.02 | 0.23 | .102 | -.028 |
| 3way | 0.02 | .04 | .03 | 0.46 | .643 | -0.06 | 0.10 | .021 | -.048 |
| **Chemistry** |  |  |  |  |  |  |  |  |  |
| (Constant) | 4.62 | .07 |  | 71.10 | <.001 | 4.49 | 4.75 |  |  |
| Ps Ideology | -0.11 | .07 | -.09 | -1.76 | .079 | -0.24 | 0.01 | -.081 | .031 |
| Slant | 0.02 | .07 | .02 | 0.31 | .759 | -0.12 | 0.16 | .014 | .026 |
| Politicization | -0.26 | .07 | -.19 | -3.91 | <.001 | -0.39 | -0.13 | -.179 | .310 |
| IdeoXSlant | 0.09 | .06 | .08 | 1.53 | .127 | -0.03 | 0.21 | .070 | .017 |
| IdeoXPolit | -0.06 | .06 | -.04 | -0.92 | .360 | -0.17 | 0.06 | -.042 | .044 |
| SlantXPolit | 0.04 | .06 | .04 | 0.72 | .474 | -0.08 | 0.16 | .033 | .022 |
| 3way | 0.06 | .05 | .08 | 1.30 | .193 | -0.03 | 0.16 | .060 | -.060 |
| **Computer Science** | |  |  |  |  |  |  |  |  |
| (Constant) | 4.57 | .06 |  | 74.67 | <.001 | 4.45 | 4.69 |  |  |
| Ps Ideology | -0.05 | .06 | -.04 | -0.84 | .403 | -0.17 | 0.07 | -.038 | .062 |
| Slant | -0.04 | .07 | -.03 | -0.63 | .528 | -0.18 | 0.09 | -.028 | .026 |
| Politicization | -0.29 | .06 | -.22 | -4.49 | <.001 | -0.41 | -0.16 | -.202 | .323 |
| IdeoXSlant | 0.19 | .06 | .17 | 3.17 | .002 | 0.07 | 0.31 | .143 | .059 |
| IdeoXPolit | -0.08 | .06 | -.07 | -1.43 | .155 | -0.20 | 0.03 | -.064 | .015 |
| SlantXPolit | 0.10 | .05 | .11 | 1.97 | .049 | 0.00 | 0.21 | .089 | .008 |
| 3way | 0.03 | .04 | .04 | 0.69 | .494 | -0.06 | 0.12 | .031 | -.009 |
| **Philosophy** |  |  |  |  |  |  |  |  |  |
| (Constant) | 3.83 | .06 |  | 61.06 | <.001 | 3.71 | 3.96 |  |  |
| Ps Ideology | -0.26 | .06 | -.18 | -4.14 | <.001 | -0.38 | -0.14 | -.174 | .043 |
| Slant | 0.14 | .07 | .10 | 2.07 | .039 | 0.01 | 0.27 | .087 | -.093 |
| Politicization | -0.26 | .06 | -.18 | -4.14 | <.001 | -0.39 | -0.14 | -.174 | .313 |
| IdeoXSlant | 0.33 | .07 | .25 | 5.05 | <.001 | 0.20 | 0.46 | .213 | -.038 |
| IdeoXPolit | -0.04 | .06 | -.03 | -0.62 | .536 | -0.15 | 0.08 | -.026 | -.049 |
| SlantXPolit | 0.05 | .06 | .04 | 0.84 | .401 | -0.07 | 0.17 | .035 | -.018 |
| 3way | 0.06 | .05 | .06 | 1.13 | .261 | -0.05 | 0.17 | .047 | -.104 |
| **Biology** |  |  |  |  |  |  |  |  |  |
| (Constant) | 4.51 | .06 |  | 71.38 | <.001 | 4.38 | 4.63 |  |  |
| Ps Ideology | -0.23 | .06 | -.17 | -3.65 | <.001 | -0.36 | -0.11 | -.158 | .072 |
| Slant | -0.05 | .07 | -.04 | -0.77 | .445 | -0.19 | 0.09 | -.033 | .027 |
| Politicization | -0.28 | .06 | -.20 | -4.32 | <.001 | -0.40 | -0.15 | -.187 | .293 |
| IdeoXSlant | 0.12 | .07 | .10 | 1.79 | .075 | -0.01 | 0.25 | .077 | -.009 |
| IdeoXPolit | -0.09 | .06 | -.07 | -1.60 | .111 | -0.21 | 0.02 | -.069 | .056 |
| SlantXPolit | 0.11 | .06 | .10 | 1.76 | .079 | -0.01 | 0.23 | .076 | .026 |
| 3way | 0.11 | .05 | .13 | 2.11 | .035 | 0.01 | 0.21 | .092 | -.095 |
| **Sociology** |  |  |  |  |  |  |  |  |  |
| (Constant) | 3.80 | .06 |  | 64.61 | <.001 | 3.69 | 3.92 |  |  |
| Ps Ideology | -0.43 | .06 | -.31 | -7.33 | <.001 | -0.55 | -0.32 | -.287 | .122 |
| Slant | 0.22 | .07 | .16 | 3.46 | <.001 | 0.10 | 0.35 | .136 | -.072 |
| Politicization | -0.21 | .06 | -.15 | -3.54 | <.001 | -0.33 | -0.10 | -.139 | .366 |
| IdeoXSlant | 0.18 | .06 | .15 | 3.12 | .002 | 0.07 | 0.29 | .122 | -.009 |
| IdeoXPolit | -0.07 | .05 | -.06 | -1.34 | .181 | -0.18 | 0.03 | -.052 | .015 |
| SlantXPolit | 0.13 | .06 | .11 | 2.01 | .045 | 0.00 | 0.25 | .079 | .053 |
| 3way | 0.02 | .05 | .02 | 0.39 | .698 | -0.07 | 0.11 | .015 | -.111 |
| **Art & Art History** | |  |  |  |  |  |  |  |  |
| (Constant) | 4.11 | .07 |  | 63.41 | <.001 | 3.99 | 4.24 |  |  |
| Ps Ideology | -0.28 | .07 | -.20 | -4.32 | <.001 | -0.41 | -0.15 | -.182 | .028 |
| Slant | 0.07 | .07 | .05 | 0.98 | .326 | -0.07 | 0.20 | .041 | .015 |
| Politicization | -0.27 | .07 | -.18 | -4.05 | <.001 | -0.39 | -0.14 | -.170 | .317 |
| IdeoXSlant | 0.22 | .07 | .16 | 3.05 | .002 | 0.08 | 0.36 | .128 | -.031 |
| IdeoXPolit | -0.14 | .06 | -.11 | -2.36 | .019 | -0.26 | -0.02 | -.099 | .154 |
| SlantXPolit | 0.08 | .06 | .06 | 1.27 | .204 | -0.04 | 0.21 | .053 | -.044 |
| 3way | 0.06 | .06 | .06 | 1.09 | .276 | -0.05 | 0.17 | .046 | .020 |
| **Ethnic Studies** | |  |  |  |  |  |  |  |  |
| (Constant) | 3.76 | .07 |  | 57.89 | <.001 | 3.63 | 3.89 |  |  |
| Ps Ideology | -0.52 | .07 | -.35 | -7.95 | <.001 | -0.65 | -0.39 | -.299 | .139 |
| Slant | 0.24 | .07 | .16 | 3.62 | <.001 | 0.11 | 0.38 | .136 | -.029 |
| Politicization | -0.27 | .06 | -.18 | -4.19 | <.001 | -0.40 | -0.14 | -.157 | .362 |
| IdeoXSlant | 0.24 | .06 | .17 | 3.73 | <.001 | 0.11 | 0.37 | .140 | -.017 |
| IdeoXPolit | -0.12 | .06 | -.09 | -2.06 | .040 | -0.24 | -0.01 | -.077 | .074 |
| SlantXPolit | 0.17 | .07 | .11 | 2.47 | .014 | 0.03 | 0.30 | .093 | -.026 |
| 3way | 0.04 | .06 | .03 | 0.62 | .538 | -0.08 | 0.15 | .023 | -.118 |
| **Religious Studies** | |  |  |  |  |  |  |  |  |
| (Constant) | 3.33 | .07 |  | 49.43 | <.001 | 3.20 | 3.47 |  |  |
| Ps Ideology | 0.21 | .07 | .15 | 3.23 | .001 | 0.08 | 0.34 | .140 | -.099 |
| Slant | -0.11 | .07 | -.08 | -1.55 | .122 | -0.26 | 0.03 | -.067 | .008 |
| Politicization | -0.16 | .07 | -.11 | -2.22 | .027 | -0.29 | -0.02 | -.097 | .217 |
| IdeoXSlant | 0.51 | .07 | .38 | 7.57 | <.001 | 0.38 | 0.65 | .328 | -.089 |
| IdeoXPolit | -0.01 | .06 | -.01 | -0.21 | .837 | -0.13 | 0.11 | -.009 | -.050 |
| SlantXPolit | 0.05 | .06 | .04 | 0.80 | .424 | -0.07 | 0.18 | .035 | .016 |
| 3way | -0.01 | .06 | -.01 | -0.23 | .818 | -0.12 | 0.10 | -.010 | .032 |
| **Social Work** |  |  |  |  |  |  |  |  |  |
| (Constant) | 4.04 | .07 |  | 60.78 | <.001 | 3.91 | 4.17 |  |  |
| Ps Ideology | -0.48 | .07 | -.33 | -7.20 | <.001 | -0.61 | -0.35 | -.286 | .152 |
| Slant | 0.08 | .07 | .06 | 1.22 | .223 | -0.05 | 0.22 | .048 | -.002 |
| Politicization | -0.25 | .07 | -.17 | -3.80 | <.001 | -0.38 | -0.12 | -.151 | .280 |
| IdeoXSlant | 0.23 | .07 | .17 | 3.50 | <.001 | 0.10 | 0.36 | .139 | -.069 |
| IdeoXPolit | -0.13 | .06 | -.09 | -2.08 | .038 | -0.25 | -0.01 | -.083 | .063 |
| SlantXPolit | 0.18 | .07 | .12 | 2.74 | .006 | 0.05 | 0.31 | .109 | -.018 |
| 3way | 0.02 | .06 | .02 | 0.41 | .683 | -0.09 | 0.14 | .016 | -.103 |
| **Education** |  |  |  |  |  |  |  |  |  |
| (Constant) | 4.10 | .07 |  | 60.46 | <.001 | 3.97 | 4.24 |  |  |
| Ps Ideology | -0.31 | .07 | -.20 | -4.44 | <.001 | -0.45 | -0.17 | -.179 | .117 |
| Slant | 0.06 | .08 | .04 | 0.80 | .425 | -0.09 | 0.21 | .032 | -.036 |
| Politicization | -0.35 | .07 | -.23 | -5.20 | <.001 | -0.49 | -0.22 | -.210 | .345 |
| IdeoXSlant | 0.35 | .07 | .26 | 5.12 | <.001 | 0.22 | 0.49 | .207 | -.092 |
| IdeoXPolit | -0.06 | .07 | -.04 | -0.92 | .358 | -0.19 | 0.07 | -.037 | .085 |
| SlantXPolit | 0.10 | .07 | .07 | 1.50 | .135 | -0.03 | 0.24 | .061 | .000 |
| 3way | 0.06 | .06 | .05 | 1.02 | .308 | -0.06 | 0.18 | .041 | -.001 |
| **Foreign Languages and Literatures** | | | |  |  |  |  |  |  |
| (Constant) | 4.19 | .06 |  | 66.06 | <.001 | 4.07 | 4.31 |  |  |
| Ps Ideology | -0.33 | .07 | -.23 | -5.02 | <.001 | -0.46 | -0.20 | -.221 | .081 |
| Slant | 0.11 | .07 | .08 | 1.61 | .107 | -0.03 | 0.25 | .071 | -.040 |
| Politicization | -0.16 | .06 | -.11 | -2.45 | .015 | -0.28 | -0.03 | -.108 | .356 |
| IdeoXSlant | 0.20 | .07 | .16 | 2.79 | .005 | 0.06 | 0.34 | .123 | -.050 |
| IdeoXPolit | -0.03 | .06 | -.02 | -0.52 | .607 | -0.15 | 0.09 | -.023 | .030 |
| SlantXPolit | 0.07 | .06 | .07 | 1.15 | .250 | -0.05 | 0.19 | .051 | -.084 |
| 3way | 0.04 | .05 | .04 | 0.71 | .481 | -0.06 | 0.14 | .031 | .100 |
| **Psychology** |  |  |  |  |  |  |  |  |  |
| (Constant) | 3.95 | .07 |  | 58.21 | <.001 | 3.81 | 4.08 |  |  |
| Ps Ideology | -0.32 | .07 | -.21 | -4.55 | <.001 | -0.46 | -0.18 | -.193 | .054 |
| Slant | 0.09 | .08 | .06 | 1.23 | .221 | -0.06 | 0.25 | .052 | -.026 |
| Politicization | -0.27 | .07 | -.19 | -4.04 | <.001 | -0.41 | -0.14 | -.172 | .272 |
| IdeoXSlant | 0.27 | .07 | .21 | 3.85 | <.001 | 0.13 | 0.41 | .164 | -.006 |
| IdeoXPolit | -0.02 | .07 | -.01 | -0.30 | .761 | -0.15 | 0.11 | -.013 | .073 |
| SlantXPolit | 0.14 | .07 | .11 | 2.08 | .038 | 0.01 | 0.26 | .089 | -.062 |
| 3way | 0.03 | .05 | .03 | 0.52 | .607 | -0.08 | 0.13 | .022 | -.063 |
| **Economics** |  |  |  |  |  |  |  |  |  |
| (Constant) | 3.95 | .06 |  | 62.54 | <.001 | 3.82 | 4.07 |  |  |
| Ps Ideology | 0.06 | .07 | .04 | 0.85 | .396 | -0.07 | 0.18 | .038 | -.017 |
| Slant | 0.01 | .07 | .01 | 0.20 | .840 | -0.12 | 0.15 | .009 | .077 |
| Politicization | -0.21 | .06 | -.16 | -3.39 | <.001 | -0.34 | -0.09 | -.153 | .284 |
| IdeoXSlant | 0.25 | .07 | .20 | 3.75 | <.001 | 0.12 | 0.38 | .169 | -.016 |
| IdeoXPolit | 0.08 | .06 | .06 | 1.29 | .199 | -0.04 | 0.21 | .058 | -.022 |
| SlantXPolit | 0.12 | .06 | .10 | 1.99 | .047 | 0.00 | 0.24 | .090 | -.057 |
| 3way | 0.06 | .05 | .06 | 1.10 | .272 | -0.05 | 0.16 | .050 | -.140 |
| **Engineering** |  |  |  |  |  |  |  |  |  |
| (Constant) | 4.73 | .06 |  | 77.50 | <.001 | 4.61 | 4.85 |  |  |
| Ps Ideology | 0.02 | .06 | .01 | 0.25 | .806 | -0.11 | 0.14 | .011 | .061 |
| Slant | 0.09 | .07 | .07 | 1.39 | .166 | -0.04 | 0.23 | .065 | -.026 |
| Politicization | -0.25 | .06 | -.20 | -3.87 | <.001 | -0.38 | -0.12 | -.180 | .322 |
| IdeoXSlant | 0.16 | .06 | .14 | 2.60 | .010 | 0.04 | 0.28 | .121 | -.042 |
| IdeoXPolit | -0.06 | .07 | -.05 | -0.94 | .348 | -0.19 | 0.07 | -.044 | -.022 |
| SlantXPolit | 0.05 | .05 | .05 | 0.92 | .358 | -0.05 | 0.14 | .043 | -.060 |
| 3way | -0.02 | .05 | -.03 | -0.53 | .594 | -0.11 | 0.07 | -.025 | .054 |
| **Business** |  |  |  |  |  |  |  |  |  |
| (Constant) | 3.68 | .07 |  | 53.24 | <.001 | 3.55 | 3.82 |  |  |
| Ps Ideology | 0.30 | .07 | .20 | 4.18 | <.001 | 0.16 | 0.44 | .189 | -.119 |
| Slant | -0.07 | .07 | -.05 | -0.95 | .345 | -0.21 | 0.07 | -.043 | .078 |
| Politicization | -0.17 | .07 | -.12 | -2.43 | .016 | -0.31 | -0.03 | -.110 | .219 |
| IdeoXSlant | 0.22 | .07 | .15 | 3.01 | .003 | 0.08 | 0.36 | .136 | -.081 |
| IdeoXPolit | 0.02 | .07 | .01 | 0.29 | .770 | -0.11 | 0.15 | .013 | -.016 |
| SlantXPolit | 0.17 | .07 | .12 | 2.50 | .013 | 0.04 | 0.30 | .113 | .005 |
| 3way | 0.05 | .06 | .04 | 0.82 | .410 | -0.07 | 0.18 | .037 | .028 |
| **Physics** |  |  |  |  |  |  |  |  |  |
| (Constant) | 4.79 | .07 |  | 72.87 | <.001 | 4.66 | 4.92 |  |  |
| Ps Ideology | -0.12 | .07 | -.08 | -1.76 | .079 | -0.25 | 0.01 | -.080 | .071 |
| Slant | -0.02 | .07 | -.02 | -0.29 | .770 | -0.16 | 0.12 | -.013 | -.007 |
| Politicization | -0.33 | .07 | -.24 | -5.04 | <.001 | -0.46 | -0.20 | -.230 | .380 |
| IdeoXSlant | 0.10 | .07 | .08 | 1.53 | .126 | -0.03 | 0.23 | .070 | .101 |
| IdeoXPolit | -0.04 | .06 | -.03 | -0.67 | .506 | -0.17 | 0.08 | -.030 | -.004 |
| SlantXPolit | 0.03 | .05 | .02 | 0.48 | .632 | -0.08 | 0.13 | .022 | -.086 |
| 3way | 0.14 | .05 | .16 | 2.96 | .003 | 0.05 | 0.23 | .135 | .100 |
| **Nursing** |  |  |  |  |  |  |  |  |  |
| (Constant) | 4.57 | .06 |  | 71.01 | <.001 | 4.45 | 4.70 |  |  |
| Ps Ideology | -0.16 | .07 | -.11 | -2.33 | .020 | -0.29 | -0.02 | -.104 | .032 |
| Slant | -0.07 | .07 | -.05 | -1.01 | .315 | -0.21 | 0.07 | -.045 | .075 |
| Politicization | -0.29 | .07 | -.21 | -4.39 | <.001 | -0.42 | -0.16 | -.197 | .311 |
| IdeoXSlant | 0.27 | .06 | .22 | 4.21 | <.001 | 0.14 | 0.40 | .189 | -.103 |
| IdeoXPolit | 0.03 | .06 | .02 | 0.40 | .693 | -0.10 | 0.15 | .018 | -.027 |
| SlantXPolit | 0.16 | .06 | .15 | 2.54 | .012 | 0.04 | 0.29 | .114 | .049 |
| 3way | -0.04 | .05 | -.05 | -0.78 | .435 | -0.14 | 0.06 | -.035 | .112 |
| **History** |  |  |  |  |  |  |  |  |  |
| (Constant) | 4.12 | .06 |  | 65.43 | <.001 | 4.00 | 4.24 |  |  |
| Ps Ideology | -0.19 | .07 | -.14 | -2.96 | .003 | -0.32 | -0.07 | -.129 | .064 |
| Slant | 0.09 | .07 | .06 | 1.28 | .203 | -0.05 | 0.22 | .055 | -.009 |
| Politicization | -0.35 | .06 | -.25 | -5.49 | <.001 | -0.47 | -0.22 | -.239 | .392 |
| IdeoXSlant | 0.22 | .06 | .16 | 3.38 | <.001 | 0.09 | 0.34 | .147 | -.119 |
| IdeoXPolit | 0.00 | .06 | .00 | -0.05 | .957 | -0.13 | 0.12 | -.002 | .041 |
| SlantXPolit | 0.13 | .06 | .11 | 2.21 | .028 | 0.01 | 0.25 | .096 | .052 |
| 3way | 0.00 | .05 | .00 | 0.05 | .961 | -0.10 | 0.10 | .002 | .042 |
| **Earth & Planetary Sciences** | | |  |  |  |  |  |  |  |
| (Constant) | 4.51 | .07 |  | 66.08 | <.001 | 4.37 | 4.64 |  |  |
| Ps Ideology | -0.36 | .07 | -.24 | -5.07 | <.001 | -0.49 | -0.22 | -.222 | .136 |
| Slant | 0.02 | .07 | .02 | 0.30 | .765 | -0.12 | 0.17 | .013 | .041 |
| Politicization | -0.29 | .07 | -.19 | -4.20 | <.001 | -0.42 | -0.15 | -.184 | .356 |
| IdeoXSlant | 0.27 | .08 | .18 | 3.56 | <.001 | 0.12 | 0.41 | .156 | .009 |
| IdeoXPolit | 0.05 | .06 | .04 | 0.81 | .419 | -0.07 | 0.18 | .035 | .035 |
| SlantXPolit | 0.06 | .06 | .04 | 0.87 | .382 | -0.07 | 0.18 | .038 | -.080 |
| 3way | 0.06 | .06 | .05 | 1.03 | .302 | -0.06 | 0.18 | .045 | .032 |
| **Information Technology** | | |  |  |  |  |  |  |  |
| (Constant) | 4.41 | .06 |  | 69.90 | <.001 | 4.29 | 4.53 |  |  |
| Ps Ideology | 0.01 | .07 | .00 | 0.08 | .935 | -0.12 | 0.13 | .004 | .000 |
| Slant | 0.04 | .07 | .03 | 0.59 | .555 | -0.10 | 0.18 | .027 | .018 |
| Politicization | -0.29 | .06 | -.22 | -4.58 | <.001 | -0.41 | -0.17 | -.210 | .409 |
| IdeoXSlant | 0.13 | .08 | .11 | 1.74 | .082 | -0.02 | 0.29 | .080 | -.060 |
| IdeoXPolit | -0.01 | .06 | -.01 | -0.18 | .860 | -0.12 | 0.10 | -.008 | -.012 |
| SlantXPolit | 0.08 | .05 | .08 | 1.48 | .139 | -0.03 | 0.18 | .068 | -.032 |
| 3way | 0.03 | .05 | .05 | 0.72 | .474 | -0.06 | 0.13 | .033 | .011 |
| **English Language and Literature** | | |  |  |  |  |  |  |  |
| (Constant) | 4.27 | .07 |  | 66.16 | <.001 | 4.14 | 4.40 |  |  |
| Ps Ideology | -0.28 | .07 | -.19 | -4.15 | <.001 | -0.41 | -0.15 | -.180 | .078 |
| Slant | 0.14 | .07 | .10 | 1.99 | .047 | 0.00 | 0.27 | .086 | -.080 |
| Politicization | -0.16 | .07 | -.12 | -2.50 | .013 | -0.29 | -0.04 | -.108 | .333 |
| IdeoXSlant | 0.25 | .07 | .18 | 3.45 | <.001 | 0.11 | 0.39 | .149 | .005 |
| IdeoXPolit | 0.00 | .06 | .00 | -0.05 | .959 | -0.13 | 0.12 | -.002 | .077 |
| SlantXPolit | 0.04 | .06 | .04 | 0.69 | .493 | -0.08 | 0.17 | .030 | .017 |
| 3way | 0.10 | .06 | .09 | 1.64 | .103 | -0.02 | 0.22 | .071 | .007 |
| **Public Health** |  |  |  |  |  |  |  |  |  |
| (Constant) | 4.07 | .07 |  | 62.43 | <.001 | 3.94 | 4.19 |  |  |
| Ps Ideology | -0.35 | .07 | -.23 | -5.12 | <.001 | -0.48 | -0.21 | -.213 | .167 |
| Slant | 0.21 | .07 | .14 | 2.92 | .004 | 0.07 | 0.36 | .121 | -.036 |
| Politicization | -0.26 | .07 | -.18 | -4.03 | <.001 | -0.39 | -0.13 | -.167 | .346 |
| IdeoXSlant | 0.35 | .08 | .26 | 4.69 | <.001 | 0.21 | 0.50 | .195 | -.165 |
| IdeoXPolit | 0.11 | .06 | .08 | 1.80 | .073 | -0.01 | 0.24 | .075 | .032 |
| SlantXPolit | 0.03 | .07 | .03 | 0.53 | .599 | -0.09 | 0.16 | .022 | .102 |
| 3way | 0.02 | .06 | .02 | 0.34 | .733 | -0.10 | 0.14 | .014 | -.007 |
| **Criminal Justice** | |  |  |  |  |  |  |  |  |
| (Constant) | 3.80 | .07 |  | 57.71 | <.001 | 3.67 | 3.93 |  |  |
| Ps Ideology | -0.07 | .07 | -.04 | -0.96 | .336 | -0.20 | 0.07 | -.042 | -.043 |
| Slant | -0.08 | .08 | -.05 | -1.01 | .315 | -0.22 | 0.07 | -.044 | .052 |
| Politicization | -0.34 | .07 | -.23 | -5.15 | <.001 | -0.47 | -0.21 | -.226 | .343 |
| IdeoXSlant | 0.43 | .07 | .30 | 5.97 | <.001 | 0.29 | 0.57 | .262 | -.064 |
| IdeoXPolit | 0.08 | .07 | .06 | 1.22 | .225 | -0.05 | 0.21 | .053 | -.036 |
| SlantXPolit | 0.06 | .07 | .05 | 0.89 | .372 | -0.07 | 0.19 | .039 | -.008 |
| 3way | -0.04 | .06 | -.03 | -0.65 | .517 | -0.15 | 0.08 | -.028 | -.074 |
| **Women's and Gender Studies** | | |  |  |  |  |  |  |  |
| (Constant) | 3.77 | .07 |  | 51.91 | <.001 | 3.63 | 3.91 |  |  |
| Ps Ideology | -0.74 | .08 | -.42 | -9.74 | <.001 | -0.88 | -0.59 | -.356 | .280 |
| Slant | 0.35 | .08 | .21 | 4.65 | <.001 | 0.20 | 0.50 | .170 | -.093 |
| Politicization | -0.31 | .07 | -.18 | -4.21 | <.001 | -0.46 | -0.17 | -.154 | .283 |
| IdeoXSlant | 0.27 | .07 | .17 | 3.79 | <.001 | 0.13 | 0.40 | .139 | -.088 |
| IdeoXPolit | -0.16 | .07 | -.09 | -2.22 | .027 | -0.30 | -0.02 | -.081 | .042 |
| SlantXPolit | 0.18 | .07 | .10 | 2.50 | .013 | 0.04 | 0.33 | .091 | -.068 |
| 3way | 0.04 | .08 | .02 | 0.51 | .608 | -0.11 | 0.19 | .019 | .064 |

**Politicization and Appropriateness on Trust and Skepticism**

As above, higher perceived politicization continued to predict lower trust and higher skepticism toward all disciplines (see Table S13). Higher perceived appropriateness of politicization was often (21/30) associated with higher trust, but rarely (1/30) less skepticism, and these relationships were often moderated by perceived politicization.

Although few participants considered politicization appropriate (and so, the results below should be taken with a grain of salt), we also explored the interactions between perceived appropriateness of politicization and politicization on trust and skepticism). When politicization was viewed as inappropriate (below midpoint), higher politicization was consistently related to lower trust and higher skepticism. When politicization was viewed as appropriate (above the midpoint), these relationships were more mixed—sometimes weaker, sometimes nearly flat, and in some cases, reversed. However, we also saw that those who found politicization appropriate, if anything, were somewhat higher on skepticism (main effects for 12/30 disciplines). These findings indicate that the minority who perceive politicization as appropriate are generally less bothered by politicization, and at least in some cases, may prefer it. However, these same people may also be more skeptical of many academic disciplines.

| **Table S13.** *Interactions Between Perceived Appropriateness and Perceived Politicization on Trust (Full Regression Results) And Skepticism (Semipartial rs Only) For All Academic Disciplines* | | | | | | | | | |
| --- | --- | --- | --- | --- | --- | --- | --- | --- | --- |
|  | **Trust** | | | | | | | | **Skepticism** |
|  |  |  |  |  |  | 95% CI | | Semipartial | Semipartial |
|  | *B* | *SE* | *Beta* | *t* | *p* | *Low* | *High* | *r* | *r* |
| **Anthropology** | |  |  |  |  |  |  |  |  |
| (Constant) | 3.99 | .06 |  | 62.62 | <.001 | 3.86 | 4.11 |  |  |
| Appropriateness | 0.19 | .07 | .13 | 2.77 | .006 | 0.05 | 0.32 | .122 | .118 |
| Politicization | -0.52 | .06 | -.37 | -8.00 | <.001 | -0.64 | -0.39 | -.352 | .368 |
| 2way | 0.17 | .07 | .12 | 2.49 | .013 | 0.04 | 0.30 | .110 | -.173 |
| **Environmental Science** | | |  |  |  |  |  |  |  |
| (Constant) | 4.06 | .07 |  | 58.41 | <.001 | 3.93 | 4.20 |  |  |
| Appropriateness | 0.23 | .07 | .14 | 3.14 | .002 | 0.09 | 0.37 | .133 | .014 |
| Politicization | -0.53 | .07 | -.33 | -7.45 | <.001 | -0.67 | -0.39 | -.316 | .397 |
| 2way | 0.42 | .07 | .26 | 5.80 | <.001 | 0.28 | 0.56 | .246 | -.135 |
| **Communications** | |  |  |  |  |  |  |  |  |
| (Constant) | 3.71 | .06 |  | 63.14 | <.001 | 3.59 | 3.82 |  |  |
| Appropriateness | 0.30 | .06 | .23 | 4.78 | <.001 | 0.18 | 0.42 | .211 | .084 |
| Politicization | -0.38 | .06 | -.29 | -6.31 | <.001 | -0.50 | -0.26 | -.278 | .351 |
| 2way | 0.19 | .06 | .15 | 3.23 | .001 | 0.08 | 0.31 | .142 | -.029 |
| **Music** |  |  |  |  |  |  |  |  |  |
| (Constant) | 4.14 | .07 |  | 62.29 | <.001 | 4.01 | 4.27 |  |  |
| Appropriateness | 0.13 | .07 | .09 | 1.78 | .076 | -0.01 | 0.27 | .080 | .284 |
| Politicization | -0.45 | .07 | -.32 | -6.76 | <.001 | -0.59 | -0.32 | -.303 | .254 |
| 2way | 0.23 | .06 | .18 | 3.77 | <.001 | 0.11 | 0.35 | .169 | -.171 |
| **Political Science** | |  |  |  |  |  |  |  |  |
| (Constant) | 3.32 | .07 |  | 51.09 | <.001 | 3.20 | 3.45 |  |  |
| Appropriateness | 0.23 | .07 | .16 | 3.39 | <.001 | 0.10 | 0.36 | .150 | .130 |
| Politicization | -0.55 | .07 | -.38 | -8.36 | <.001 | -0.68 | -0.42 | -.370 | .306 |
| 2way | 0.06 | .06 | .04 | 0.93 | .352 | -0.07 | 0.19 | .041 | -.136 |
| **Mathematics** |  |  |  |  |  |  |  |  |  |
| (Constant) | 4.64 | .07 |  | 67.54 | <.001 | 4.50 | 4.77 |  |  |
| Appropriateness | -0.20 | .09 | -.15 | -2.34 | .020 | -0.38 | -0.03 | -.107 | .196 |
| Politicization | -0.35 | .07 | -.25 | -4.84 | <.001 | -0.49 | -0.21 | -.221 | .296 |
| 2way | 0.28 | .06 | .30 | 5.01 | <.001 | 0.17 | 0.40 | .229 | -.054 |
| **Chemistry** |  |  |  |  |  |  |  |  |  |
| (Constant) | 4.48 | .07 |  | 69.15 | <.001 | 4.35 | 4.61 |  |  |
| Appropriateness | -0.11 | .08 | -.08 | -1.44 | .151 | -0.27 | 0.04 | -.065 | .254 |
| Politicization | -0.38 | .07 | -.28 | -5.67 | <.001 | -0.51 | -0.25 | -.255 | .245 |
| 2way | 0.31 | .06 | .30 | 5.51 | <.001 | 0.20 | 0.43 | .248 | -.122 |
| **Computer Science** | |  |  |  |  |  |  |  |  |
| (Constant) | 4.50 | .06 |  | 71.41 | <.001 | 4.38 | 4.63 |  |  |
| Appropriateness | -0.02 | .07 | -.02 | -0.30 | .764 | -0.16 | 0.12 | -.014 | .306 |
| Politicization | -0.36 | .07 | -.28 | -5.61 | <.001 | -0.49 | -0.24 | -.257 | .251 |
| 2way | 0.19 | .05 | .19 | 3.58 | <.001 | 0.09 | 0.29 | .164 | -.124 |
| **Philosophy** |  |  |  |  |  |  |  |  |  |
| (Constant) | 3.77 | .07 |  | 56.88 | <.001 | 3.64 | 3.90 |  |  |
| Appropriateness | 0.21 | .07 | .15 | 2.97 | .003 | 0.07 | 0.35 | .134 | .112 |
| Politicization | -0.46 | .07 | -.32 | -6.87 | <.001 | -0.59 | -0.33 | -.309 | .326 |
| 2way | 0.13 | .07 | .09 | 1.88 | .061 | -0.01 | 0.26 | .084 | -.054 |
| **Biology** |  |  |  |  |  |  |  |  |  |
| (Constant) | 4.39 | .06 |  | 68.27 | <.001 | 4.27 | 4.52 |  |  |
| Appropriateness | -0.04 | .07 | -.03 | -0.60 | .552 | -0.19 | 0.10 | -.027 | .216 |
| Politicization | -0.41 | .07 | -.29 | -6.28 | <.001 | -0.54 | -0.28 | -.281 | .273 |
| 2way | 0.29 | .06 | .25 | 4.80 | <.001 | 0.17 | 0.41 | .215 | -.097 |
| **Sociology** |  |  |  |  |  |  |  |  |  |
| (Constant) | 3.71 | .06 |  | 62.26 | <.001 | 3.59 | 3.82 |  |  |
| Appropriateness | 0.43 | .06 | .31 | 7.07 | <.001 | 0.31 | 0.55 | .296 | .082 |
| Politicization | -0.49 | .06 | -.35 | -8.13 | <.001 | -0.61 | -0.38 | -.340 | .429 |
| 2way | 0.20 | .06 | .14 | 3.30 | .001 | 0.08 | 0.32 | .138 | -.106 |
| **Art & Art History** | |  |  |  |  |  |  |  |  |
| (Constant) | 3.99 | .06 |  | 62.33 | <.001 | 3.86 | 4.11 |  |  |
| Appropriateness | 0.19 | .07 | .13 | 2.81 | .005 | 0.06 | 0.33 | .123 | .129 |
| Politicization | -0.49 | .07 | -.34 | -7.48 | <.001 | -0.61 | -0.36 | -.326 | .342 |
| 2way | 0.26 | .06 | .19 | 4.14 | <.001 | 0.13 | 0.38 | .181 | -.089 |
| **Ethnic Studies** | |  |  |  |  |  |  |  |  |
| (Constant) | 3.67 | .07 |  | 55.49 | <.001 | 3.54 | 3.80 |  |  |
| Appropriateness | 0.37 | .07 | .24 | 5.31 | <.001 | 0.23 | 0.50 | .228 | .058 |
| Politicization | -0.60 | .07 | -.39 | -8.66 | <.001 | -0.73 | -0.46 | -.371 | .420 |
| 2way | 0.09 | .08 | .06 | 1.20 | .231 | -0.06 | 0.24 | .051 | -.118 |
| **Religious Studies** | |  |  |  |  |  |  |  |  |
| (Constant) | 3.34 | .07 |  | 47.68 | <.001 | 3.20 | 3.48 |  |  |
| Appropriateness | 0.25 | .07 | .17 | 3.38 | <.001 | 0.10 | 0.39 | .157 | -.023 |
| Politicization | -0.31 | .07 | -.21 | -4.42 | <.001 | -0.45 | -0.17 | -.206 | .243 |
| 2way | 0.02 | .07 | .02 | 0.32 | .747 | -0.11 | 0.15 | .015 | .010 |
| **Social Work** |  |  |  |  |  |  |  |  |  |
| (Constant) | 3.91 | .06 |  | 61.68 | <.001 | 3.79 | 4.04 |  |  |
| Appropriateness | 0.52 | .07 | .35 | 7.87 | <.001 | 0.39 | 0.65 | .328 | .010 |
| Politicization | -0.53 | .07 | -.36 | -8.00 | <.001 | -0.66 | -0.40 | -.334 | .326 |
| 2way | 0.15 | .07 | .10 | 2.14 | .033 | 0.01 | 0.29 | .089 | -.182 |
| **Education** |  |  |  |  |  |  |  |  |  |
| (Constant) | 4.03 | .07 |  | 60.59 | <.001 | 3.90 | 4.16 |  |  |
| Appropriateness | 0.33 | .07 | .21 | 4.82 | <.001 | 0.19 | 0.46 | .206 | .020 |
| Politicization | -0.55 | .07 | -.35 | -8.06 | <.001 | -0.68 | -0.41 | -.345 | .408 |
| 2way | 0.21 | .07 | .13 | 3.00 | .003 | 0.07 | 0.35 | .129 | -.127 |
| **Foreign Languages and Literatures** | | | |  |  |  |  |  |  |
| (Constant) | 4.13 | .07 |  | 62.24 | <.001 | 4.00 | 4.26 |  |  |
| Appropriateness | 0.17 | .08 | .13 | 2.28 | .023 | 0.02 | 0.32 | .103 | .037 |
| Politicization | -0.33 | .07 | -.24 | -4.94 | <.001 | -0.46 | -0.20 | -.224 | .364 |
| 2way | 0.24 | .06 | .20 | 3.74 | <.001 | 0.11 | 0.36 | .169 | .010 |
| **Psychology** |  |  |  |  |  |  |  |  |  |
| (Constant) | 3.91 | .07 |  | 58.07 | <.001 | 3.77 | 4.04 |  |  |
| Appropriateness | 0.31 | .08 | .21 | 4.13 | <.001 | 0.16 | 0.46 | .181 | -.008 |
| Politicization | -0.47 | .07 | -.32 | -6.93 | <.001 | -0.60 | -0.34 | -.303 | .300 |
| 2way | 0.22 | .07 | .15 | 3.07 | .002 | 0.08 | 0.36 | .134 | -.102 |
| **Economics** |  |  |  |  |  |  |  |  |  |
| (Constant) | 3.87 | .06 |  | 62.24 | <.001 | 3.75 | 3.99 |  |  |
| Appropriateness | 0.22 | .07 | .16 | 3.24 | .001 | 0.09 | 0.35 | .144 | .055 |
| Politicization | -0.26 | .06 | -.19 | -4.17 | <.001 | -0.39 | -0.14 | -.186 | .286 |
| 2way | 0.30 | .06 | .23 | 4.67 | <.001 | 0.17 | 0.42 | .208 | -.078 |
| **Engineering** |  |  |  |  |  |  |  |  |  |
| (Constant) | 4.67 | .06 |  | 74.07 | <.001 | 4.55 | 4.80 |  |  |
| Appropriateness | 0.04 | .07 | .03 | 0.57 | .567 | -0.10 | 0.18 | .026 | .107 |
| Politicization | -0.32 | .07 | -.25 | -4.85 | <.001 | -0.44 | -0.19 | -.224 | .266 |
| 2way | 0.19 | .06 | .19 | 3.53 | <.001 | 0.09 | 0.30 | .163 | .017 |
| **Business** |  |  |  |  |  |  |  |  |  |
| (Constant) | 3.65 | .07 |  | 53.86 | <.001 | 3.51 | 3.78 |  |  |
| Appropriateness | 0.29 | .08 | .20 | 3.81 | <.001 | 0.14 | 0.43 | .174 | .090 |
| Politicization | -0.29 | .07 | -.20 | -4.17 | <.001 | -0.42 | -0.15 | -.190 | .232 |
| 2way | 0.15 | .07 | .11 | 2.10 | .036 | 0.01 | 0.29 | .096 | -.080 |
| **Physics** |  |  |  |  |  |  |  |  |  |
| (Constant) | 4.69 | .07 |  | 68.54 | <.001 | 4.56 | 4.83 |  |  |
| Appropriateness | -0.09 | .09 | -.06 | -0.95 | .345 | -0.27 | 0.09 | -.043 | .074 |
| Politicization | -0.40 | .07 | -.29 | -5.70 | <.001 | -0.54 | -0.26 | -.258 | .308 |
| 2way | 0.26 | .06 | .27 | 4.37 | <.001 | 0.14 | 0.38 | .198 | .040 |
| **Nursing** |  |  |  |  |  |  |  |  |  |
| (Constant) | 4.54 | .07 |  | 68.49 | <.001 | 4.41 | 4.67 |  |  |
| Appropriateness | 0.14 | .08 | .10 | 1.81 | .071 | -0.01 | 0.30 | .081 | .103 |
| Politicization | -0.43 | .07 | -.31 | -6.28 | <.001 | -0.56 | -0.29 | -.283 | .286 |
| 2way | 0.21 | .06 | .20 | 3.76 | <.001 | 0.10 | 0.32 | .169 | .038 |
| **History** |  |  |  |  |  |  |  |  |  |
| (Constant) | 4.05 | .06 |  | 65.97 | <.001 | 3.93 | 4.17 |  |  |
| Appropriateness | 0.24 | .07 | .17 | 3.67 | <.001 | 0.11 | 0.37 | .157 | .040 |
| Politicization | -0.48 | .06 | -.34 | -7.76 | <.001 | -0.60 | -0.36 | -.333 | .410 |
| 2way | 0.28 | .06 | .21 | 4.41 | <.001 | 0.15 | 0.40 | .189 | -.008 |
| **Earth & Planetary Sciences** | | |  |  |  |  |  |  |  |
| (Constant) | 4.50 | .07 |  | 64.00 | <.001 | 4.36 | 4.64 |  |  |
| Appropriateness | 0.20 | .08 | .14 | 2.52 | .012 | 0.04 | 0.35 | .114 | .014 |
| Politicization | -0.43 | .07 | -.29 | -6.05 | <.001 | -0.57 | -0.29 | -.273 | .386 |
| 2way | 0.18 | .08 | .12 | 2.34 | .020 | 0.03 | 0.33 | .106 | .071 |
| **Information Technology** | | |  |  |  |  |  |  |  |
| (Constant) | 4.32 | .06 |  | 68.05 | <.001 | 4.20 | 4.45 |  |  |
| Appropriateness | 0.10 | .08 | .07 | 1.16 | .248 | -0.07 | 0.26 | .052 | .059 |
| Politicization | -0.41 | .07 | -.31 | -6.31 | <.001 | -0.54 | -0.28 | -.281 | .371 |
| 2way | 0.26 | .06 | .26 | 4.48 | <.001 | 0.14 | 0.37 | .199 | -.043 |
| **English Language and Literature** | | | |  |  |  |  |  |  |
| (Constant) | 4.21 | .07 |  | 64.27 | <.001 | 4.08 | 4.34 |  |  |
| Appropriateness | 0.25 | .07 | .18 | 3.57 | <.001 | 0.11 | 0.39 | .161 | .127 |
| Politicization | -0.33 | .07 | -.23 | -4.99 | <.001 | -0.47 | -0.20 | -.225 | .355 |
| 2way | 0.20 | .07 | .14 | 2.85 | .005 | 0.06 | 0.34 | .128 | .034 |
| **Public Health** |  |  |  |  |  |  |  |  |  |
| (Constant) | 4.05 | .06 |  | 63.37 | <.001 | 3.92 | 4.17 |  |  |
| Appropriateness | 0.36 | .07 | .24 | 4.95 | <.001 | 0.21 | 0.50 | .208 | .003 |
| Politicization | -0.49 | .07 | -.33 | -7.63 | <.001 | -0.62 | -0.37 | -.321 | .417 |
| 2way | 0.29 | .07 | .20 | 4.20 | <.001 | 0.15 | 0.42 | .177 | -.023 |
| **Criminal Justice** | |  |  |  |  |  |  |  |  |
| (Constant) | 3.74 | .07 |  | 56.25 | <.001 | 3.61 | 3.87 |  |  |
| Appropriateness | 0.21 | .07 | .14 | 3.06 | .002 | 0.08 | 0.35 | .136 | .040 |
| Politicization | -0.46 | .07 | -.31 | -6.84 | <.001 | -0.59 | -0.32 | -.304 | .367 |
| 2way | 0.20 | .07 | .14 | 3.06 | .002 | 0.07 | 0.33 | .136 | -.044 |
| **Women's and Gender Studies** | | |  |  |  |  |  |  |  |
| (Constant) | 3.70 | .07 |  | 50.89 | <.001 | 3.55 | 3.84 |  |  |
| Appropriateness | 0.47 | .08 | .28 | 6.23 | <.001 | 0.32 | 0.62 | .265 | -.111 |
| Politicization | -0.61 | .07 | -.36 | -8.21 | <.001 | -0.75 | -0.46 | -.348 | .426 |
| 2way | 0.16 | .08 | .09 | 1.94 | .053 | 0.00 | 0.32 | .082 | -.122 |

**Study 5 Full Results**

**Manipulation Check**

Our manipulation was successful. Participants in the Democrat (*M* = 4.39, *SD* = 1.10) and Republican (*M* = 4.45, *SD* = 1.12) conditions viewed *Economics Professors of America (EconPA)* as more politicized than those in the control condition (*M* = 3.75, *SD* = 1.18), who viewed *EconPA* as more politicized than those in the depoliticization condition (*M* = 3.26, *SD* = 1.49), *F*(3, 802) = 42.56, *p*<.001. All conditions significantly differed, *p*s<.001, except the two politicization conditions, *p* = 1.00.

**Main Effects of Experimental Manipulation**

As can be seen in Item E8 in the Extended Data, trust toward *EconPA* was lower in the two politicization conditions than in the control condition. Although trust was directionally higher in the depoliticization condition than the control condition, this difference was not statistically significant.

Similar patterns emerged for the other outcome variables. In comparison to the control condition, in the politicization conditions, perceived politicization of *all economists* was higher, trust toward *all economists* was lower, and skepticism toward *all economists* was higher. However, the depoliticization had no impact on these outcomes relative to the control condition.

**Interactions with Ideology**

We next tested the interactions between *Z*-scored participant ideology and dummy-coded condition variables in three regressions. As shown in Item E9 in the Extended Data, the Democrat and Republican conditions were associated with significantly lower trust toward *EconPA*, and the interactions between these dummy variables with ideology also reached a threshold of |semipartial *r*|≥.10, such that the negative impact of the politicization conditions on trust was weaker among participants ideologically aligned with the politicization. However, these interactions occurred mostly below the control condition, indicating general negative effects regardless of ideological alignment, with the exceptions of the ideological extremes where the effects disappeared (on the far-left [i.e., those selecting a 1 on ideology, n = 60], Wilcoxon Rank Sum, *p* = 0.95; on the far-right [i.e., those selecting a 7 on ideology, n = 32], Wilcoxon Rank Sum, *p* = 0.70).

For trust and skepticism toward all economists, only the Democrat and Republican conditions reached a threshold of |semipartial *r*|≥.10, such that both politicization conditions reduced trust and increased skepticism toward all economists, relationships that were only very weakly moderated by ideology. These findings indicate that both the Democrat and Republican politicization of *EconPA* reduced trust and increased skepticism toward *all economists* regardless of ideological alignment.

**Donations**

The experimental manipulation had no significant impact on donation voting behavior, χ2 = 9.11, *p* < .168. This may have been due to a floor effect as *EconPA* was disfavored across all conditions including the control (receiving only 14.8%-19.8% of the vote across conditions). In contrast, *Political Neutrality and Tolerance and Science* (36.9%-46.0%) and *The American Society for the Preservation of Historical Literature* (34.8%-48.3%) received more support. Overall, *Political Neutrality and Tolerance and Science* received the most votes (42.2%), perhaps indicating a relatively high level of public support for initiatives that aim to promote political neutrality in science.
