# Supplementary material for: Politicization Undermines Trust in Institutions, Even Among the Ideologically Aligned Public
Source: Research Square preprint supplement (doi:10.21203/rs.3.rs-3239561/v1), 2023-09-20
Supplement: Supplementary file 2 [file ac4b7bc1be21f11b450d794b.docx]

Extended Data for

Politicization Undermines Trust in Institutions, Even Among the Ideologically Aligned Public

**Item E1.** *Associations Between Ideological Congruence (Between Participant and Institution) and Politicization on Trust for All 40 Institutions in Study 1*


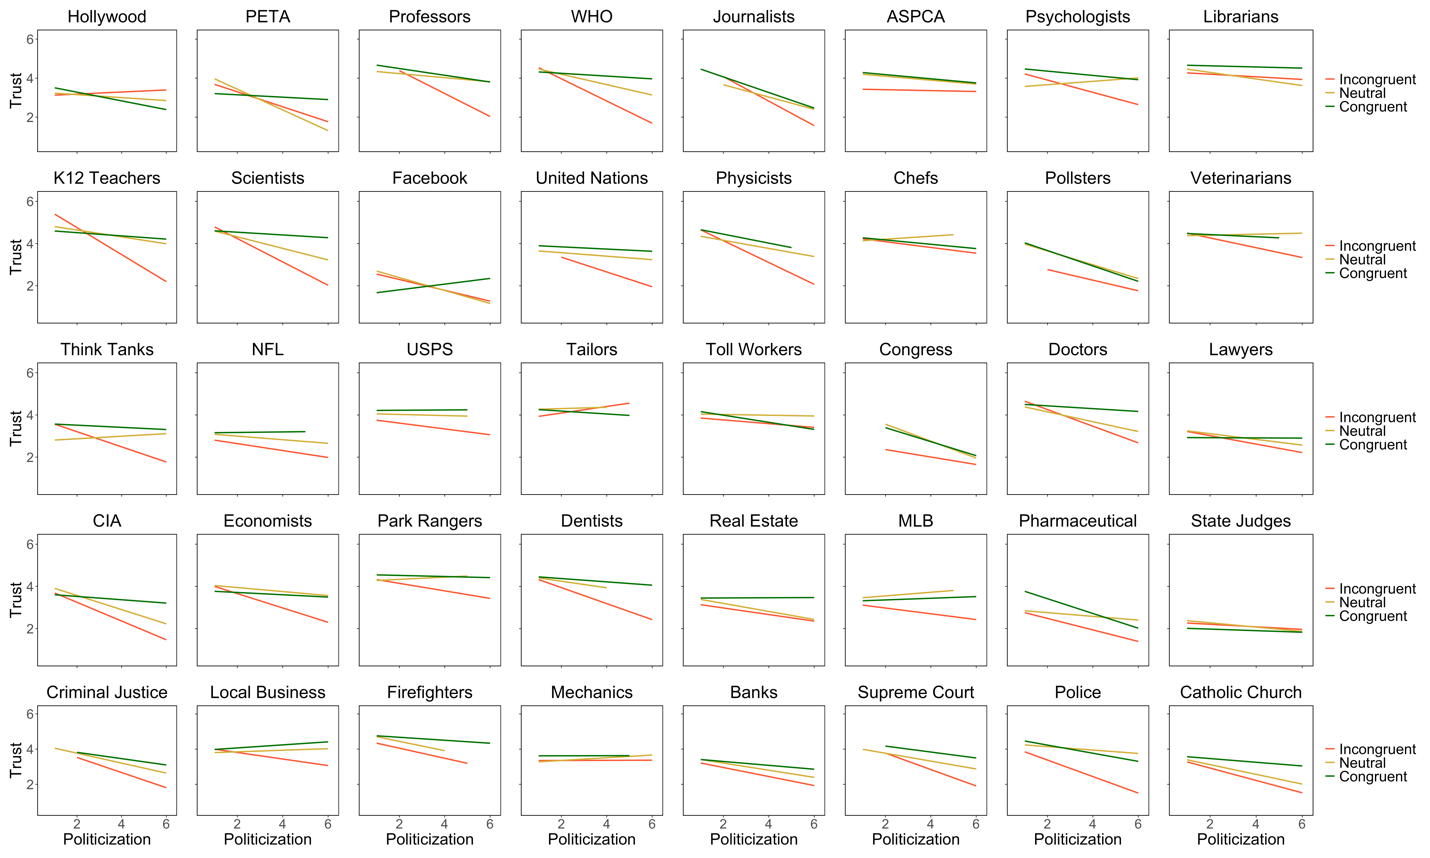


Note. Congruent = participant views the institution as slanted in the same direction of their own self-reported ideology. Incongruent = participant views the institution as slanted in the opposite direction of their own self-reported ideology. Neutral = either the participant is centrist or views the institution as ideologically balanced. Institutions are sorted from the institution perceived as slanted furthest left (Hollywood, top left) to the institution perceived as slanted furthest right (Catholic Church, bottom right).

**Item E2.** *Associations Between Ideological Congruence (Between Participant and Institution) and Politicization on Trust and Support/Deference in Studies 2a (Panel A) and 2b (Panel B)*


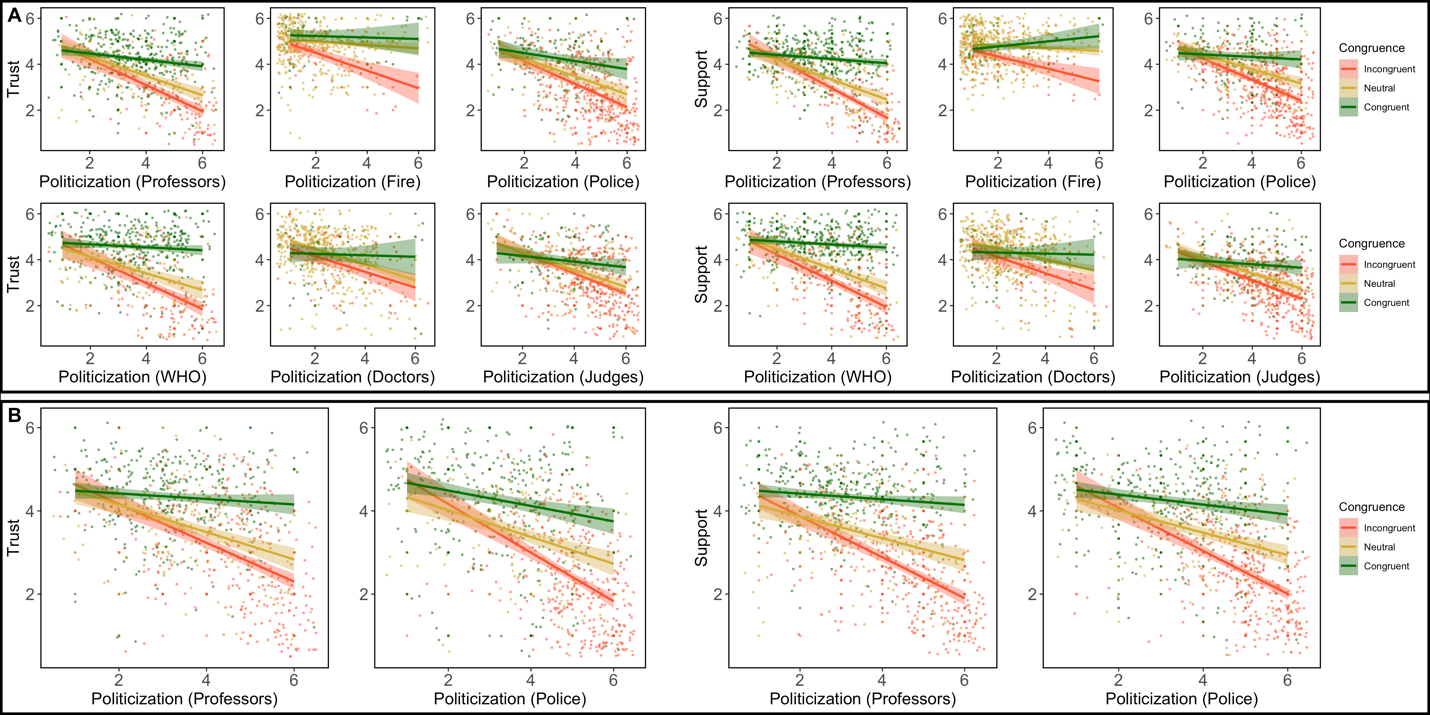


Note. Congruent = participant views the institution as slanted in the same direction of their own self-reported ideology. Incongruent = participant views the institution as slanted in the opposite direction of their own self-reported ideology. Neutral = either the participant is centrist or views the institution as ideologically balanced. The wide error bars for the congruent and incongruent subjects in the doctor and firefighter ratings reflect the small number of subjects who rated these institutions as having an ideological slant. Because of this, the positive slope between perceived politicization and deference toward (ideologically balanced) firefighters among ideologically congruent participants may be unreliable.

**Item E3.** *ANOVAs Testing the Experimental Effects of Politicization in Study 3*

|  | | | | |  |  |  |
| --- | --- | --- | --- | --- | --- | --- | --- |
| **Outcome** |  |  |  |  |  |  | **Simple** |
| Condition | ***n*** | ***M*** | ***SD*** | ***F*** | ***p*** | *η2* | **(vs. control)** |
| **Trust Get Outdoors** |  |  |  | 126.96 | <.001 | .294 |  |
| Biden | 202 | 3.89 | 1.23 |  |  |  | <.001 |
| Control | 208 | 4.61 | 0.88 |  |  |  |  |
| Trump | 202 | 2.73 | 1.44 |  |  |  | <.001 |
| **Support/Defer Get Outdoors** | |  |  | 157.40 | <.001 | .341 |  |
| Biden | 202 | 3.85 | 1.12 |  |  |  | <.001 |
| Control | 208 | 4.55 | 0.67 |  |  |  |  |
| Trump | 202 | 2.77 | 1.20 |  |  |  | <.001 |
| **Trust All Rangers** |  |  |  | 20.85 | <.001 | .064 |  |
| Biden | 200 | 4.35 | 1.01 |  |  |  | .077 |
| Control | 208 | 4.58 | 0.86 |  |  |  |  |
| Trump | 201 | 3.93 | 1.19 |  |  |  | <.001 |
| **Support/Defer All Rangers** | |  |  | 43.94 | <.001 | .127 |  |
| Biden | 200 | 4.09 | 1.02 |  |  |  | <.001 |
| Control | 208 | 4.61 | 0.66 |  |  |  |  |
| Trump | 201 | 3.73 | 1.12 |  |  |  | <.001 |
| Note. Simple refers to simple effects in contrast to the control condition. | | | | | | |  |

**Item E4.** *Interactions Between Participant Ideology and Dummy-Coded Conditions in Study 3*

|  |  |  |  |  |  | **95% CI** | | **Semipartial** |
| --- | --- | --- | --- | --- | --- | --- | --- | --- |
|  | **B** | **SE** | **Beta** | ***t*** | ***p*** | **Low** | **High** | ***r*** |
| **Trust Get Outdoors** |  |  |  |  |  |  |  |  |
| (Constant) | 4.61 | 0.08 |  | 61.17 | <.001 | 4.46 | 4.76 |  |
| Participant Ideology | -0.09 | 0.08 | -0.07 | -1.25 | .211 | -0.24 | 0.05 | -.039 |
| Trump Dummy | -1.81 | 0.11 | -0.60 | -16.79 | <.001 | -2.02 | -1.60 | -.518 |
| Biden Dummy | -0.71 | 0.11 | -0.23 | -6.54 | <.001 | -0.92 | -0.49 | -.202 |
| Trump x Ideology | 0.92 | 0.11 | 0.38 | 8.67 | <.001 | 0.71 | 1.13 | .267 |
| Biden x Ideology | -0.24 | 0.11 | -0.09 | -2.22 | .027 | -0.46 | -0.03 | -.068 |
| **Defer Get Outdoors** | |  |  |  |  |  |  |  |
| (Constant) | 4.56 | 0.06 |  | 71.05 | <.001 | 4.43 | 4.68 |  |
| Participant Ideology | -0.06 | 0.06 | -0.05 | -0.91 | .362 | -0.18 | 0.07 | -.027 |
| Trump Dummy | -1.73 | 0.09 | -0.65 | -18.88 | <.001 | -1.91 | -1.55 | -.561 |
| Biden Dummy | -0.70 | 0.09 | -0.26 | -7.65 | <.001 | -0.88 | -0.52 | -.227 |
| Trump x Ideology | 0.75 | 0.09 | 0.35 | 8.25 | <.001 | 0.57 | 0.92 | .245 |
| Biden x Ideology | -0.30 | 0.09 | -0.13 | -3.20 | .001 | -0.48 | -0.12 | -.095 |
| **Trust All Rangers** |  |  |  |  |  |  |  |  |
| (Constant) | 4.58 | 0.07 |  | 65.14 | <.001 | 4.44 | 4.72 |  |
| Participant Ideology | -0.07 | 0.07 | -0.07 | -1.06 | .289 | -0.21 | 0.06 | -.041 |
| Trump Dummy | -0.64 | 0.10 | -0.28 | -6.34 | <.001 | -0.83 | -0.44 | -.246 |
| Biden Dummy | -0.22 | 0.10 | -0.10 | -2.22 | .027 | -0.42 | -0.03 | -.086 |
| Trump x Ideology | 0.26 | 0.10 | 0.14 | 2.62 | .009 | 0.07 | 0.46 | .102 |
| Biden x Ideology | -0.16 | 0.10 | -0.09 | -1.61 | .107 | -0.36 | 0.04 | -.063 |
| **Defer All Rangers** | |  |  |  |  |  |  |  |
| (Constant) | 4.62 | 0.06 |  | 71.73 | <.001 | 4.49 | 4.74 |  |
| Participant Ideology | -0.11 | 0.06 | -0.11 | -1.74 | .082 | -0.24 | 0.01 | -.065 |
| Trump Dummy | -0.87 | 0.09 | -0.41 | -9.51 | <.001 | -1.05 | -0.69 | -.353 |
| Biden Dummy | -0.52 | 0.09 | -0.24 | -5.62 | <.001 | -0.70 | -0.34 | -.208 |
| Trump x Ideology | 0.21 | 0.09 | 0.12 | 2.36 | .019 | 0.04 | 0.39 | .088 |
| Biden x Ideology | -0.24 | 0.09 | -0.13 | -2.58 | .010 | -0.42 | -0.06 | -.096 |

**Item E5.** *MANOVA Table and Data Visualization of Interactions Between Candidate Preference and Condition in Study 3*

| **Outcome** |  |  |  |
| --- | --- | --- | --- |
| Effect | ***F*** | ***df*** | ***p*** |
| **Trust Get Outdoors** |  |  |  |
| Condition | 83.38 | 2, 599 | <.001 |
| Vote | 6.20 | 2, 599 | .002 |
| Condition x Vote | 27.71 | 4, 599 | <.001 |
| **Support/Defer Get Outdoors** | |  |  |
| Condition | 106.25 | 2, 599 | <.001 |
| Vote | 5.03 | 2, 599 | .007 |
| Condition x Vote | 37.73 | 4, 599 | <.001 |
| **Trust All Rangers** |  |  |  |
| Condition | 11.38 | 2, 599 | <.001 |
| Vote | 3.69 | 2, 599 | .025 |
| Condition x Vote | 6.33 | 4, 599 | <.001 |
| **Support/Defer All Rangers** | |  |  |
| Condition | 35.42 | 2, 599 | <.001 |
| Vote | 8.02 | 2, 599 | <.001 |
| Condition x Vote | 9.35 | 4, 599 | <.001 |


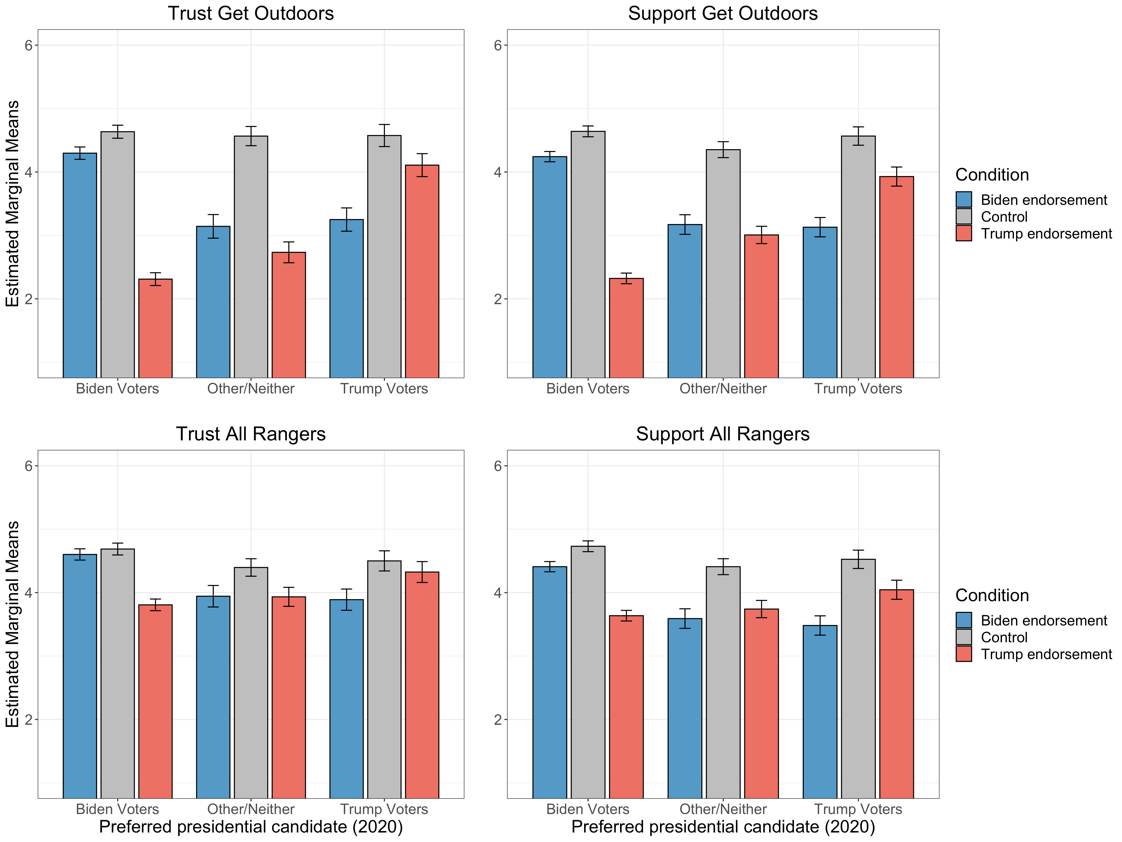


Note: Error bars represent SEs of estimated marginal means.

| **Item E6.** *Descriptives for All Primary Variables in Study 4* | | | | | | | |
| --- | --- | --- | --- | --- | --- | --- | --- |
|  |  | **Slant** | | **Politicization** | | **Trust** | | | **Skepticism** | |
|  | **n** | **M** | **SD** | **M** | **SD** | **M** | **SD** | | **M** | **SD** |
| Women's and Gender Studies | 441 | 19.28 | 19.74 | 4.62 | 1.31 | 3.71 | 1.70 | | 3.92 | 1.97 |
| Political Science | 437 | 45.08 | 19.20 | 4.43 | 1.31 | 3.33 | 1.45 | | 4.67 | 1.58 |
| Ethnic Studies | 437 | 27.59 | 20.21 | 4.11 | 1.36 | 3.68 | 1.52 | | 4.30 | 1.57 |
| Religious Studies | 437 | 64.94 | 19.28 | 4.09 | 1.37 | 3.34 | 1.47 | | 4.74 | 1.59 |
| Criminal Justice | 441 | 51.43 | 19.07 | 3.95 | 1.26 | 3.76 | 1.48 | | 3.76 | 1.80 |
| Social Work | 437 | 30.47 | 19.45 | 3.92 | 1.37 | 3.94 | 1.50 | | 4.00 | 1.49 |
| Business | 441 | 60.41 | 17.01 | 3.79 | 1.28 | 3.68 | 1.45 | | 3.54 | 1.73 |
| Economics | 441 | 56.68 | 17.42 | 3.77 | 1.25 | 3.93 | 1.37 | | 3.42 | 1.72 |
| Environmental Science | 436 | 28.74 | 19.54 | 3.76 | 1.43 | 4.13 | 1.62 | | 3.76 | 1.51 |
| Education | 441 | 37.15 | 19.69 | 3.75 | 1.46 | 4.05 | 1.55 | | 3.51 | 1.84 |
| Sociology | 437 | 34.30 | 18.66 | 3.73 | 1.36 | 3.73 | 1.41 | | 4.14 | 1.48 |
| Public Health | 441 | 38.85 | 18.36 | 3.56 | 1.39 | 4.10 | 1.48 | | 3.29 | 1.75 |
| History | 441 | 45.83 | 18.19 | 3.55 | 1.37 | 4.11 | 1.40 | | 3.54 | 1.76 |
| Philosophy | 437 | 37.50 | 19.08 | 3.52 | 1.38 | 3.80 | 1.43 | | 4.28 | 1.46 |
| Psychology | 441 | 36.66 | 18.00 | 3.32 | 1.47 | 3.96 | 1.48 | | 3.56 | 1.78 |
| Communications | 437 | 42.74 | 16.07 | 3.21 | 1.37 | 3.75 | 1.31 | | 3.80 | 1.43 |
| Art and Art History | 436 | 32.81 | 19.34 | 3.14 | 1.45 | 4.04 | 1.44 | | 3.60 | 1.47 |
| English Language and Literature | 441 | 37.37 | 18.43 | 3.13 | 1.42 | 4.25 | 1.42 | | 2.84 | 1.64 |
| Earth and Planetary Sciences | 441 | 36.71 | 17.79 | 2.96 | 1.43 | 4.56 | 1.47 | | 2.70 | 1.63 |
| Anthropology | 437 | 39.17 | 17.41 | 2.86 | 1.45 | 4.03 | 1.40 | | 3.61 | 1.42 |
| Foreign Languages and Literatures | 441 | 36.79 | 16.23 | 2.81 | 1.36 | 4.21 | 1.39 | | 2.67 | 1.60 |
| Nursing | 441 | 44.44 | 14.78 | 2.72 | 1.36 | 4.62 | 1.40 | | 2.47 | 1.54 |
| Biology | 437 | 42.41 | 16.78 | 2.71 | 1.37 | 4.48 | 1.39 | | 3.28 | 1.39 |
| Music | 437 | 36.59 | 17.91 | 2.62 | 1.39 | 4.21 | 1.43 | | 3.29 | 1.34 |
| Information Technology | 441 | 47.24 | 15.23 | 2.62 | 1.38 | 4.43 | 1.33 | | 2.69 | 1.65 |
| Computer Science | 437 | 46.96 | 15.60 | 2.41 | 1.39 | 4.57 | 1.32 | | 3.08 | 1.33 |
| Engineering | 440 | 52.87 | 14.06 | 2.35 | 1.32 | 4.75 | 1.27 | | 2.29 | 1.45 |
| Physics | 441 | 44.94 | 16.21 | 2.34 | 1.35 | 4.81 | 1.39 | | 2.37 | 1.53 |
| Chemistry | 437 | 45.96 | 14.83 | 2.27 | 1.32 | 4.60 | 1.35 | | 3.03 | 1.31 |
| Mathematics | 437 | 49.58 | 15.40 | 2.14 | 1.36 | 4.77 | 1.39 | | 2.95 | 1.28 |

| Note. For Slant, Red to White to Blue indicates increasing levels of perceived left-leaning ideology. |
| --- |
| For all other variables, Red = Top tertile of politicization, bottom tertile of trust, and top tertile of skepticism. Yellow = Middle tertile for all variables, Green = Bottom tertile of politicization, top tertile of trust, and bottom tertile of skepticism. |

**Item E7.** *Interactions Between Ideological Congruence (Between Participant and Discipline) and Perceived Politicization on Trust in Study 4*


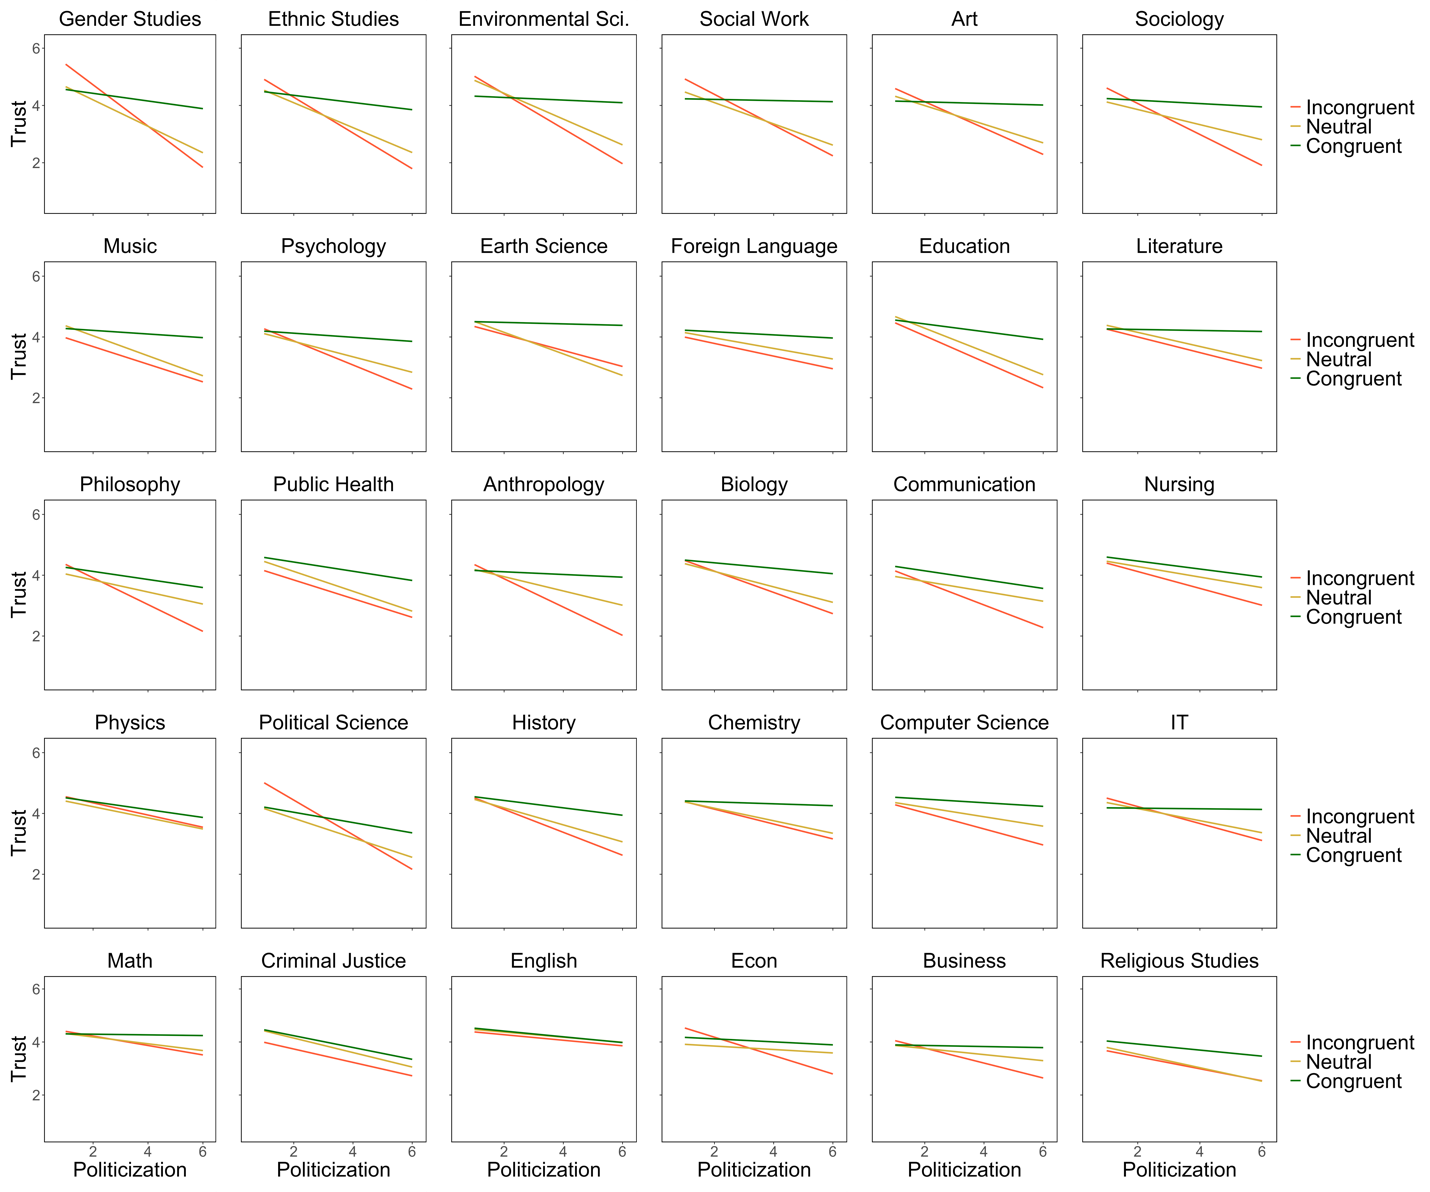


**Item E8.** *MANOVA Table Testing the Experimental Effects of Politicization in Study 5*

|  | | | | |  |  |  |
| --- | --- | --- | --- | --- | --- | --- | --- |
| **Outcome** |  |  |  |  |  |  | **Simple** |
| Condition | ***n*** | ***M*** | ***SD*** | ***F*** | ***p*** | *η2* | **(vs. control)** |
| **Trust *EconPA*** |  |  |  | 27.84 | <.001 | .09 |  |
| Depoliticization | 198 | 4.17 | 1.08 |  |  |  | 1.00 |
| Control | 202 | 4.03 | 1.04 |  |  |  |  |
| Democrat Polit. | 203 | 3.41 | 1.24 |  |  |  | <.001 |
| Republican Polit. | 203 | 3.26 | 1.44 |  |  |  | <.001 |
| **Politicization All Economists** | |  |  | 10.56 | <.001 | .04 |  |
| Depoliticization | 198 | 3.8 | 1.26 |  |  |  | 1.00 |
| Control | 202 | 3.74 | 1.18 |  |  |  |  |
| Democrat Polit. | 203 | 4.25 | 1.05 |  |  |  | <.001 |
| Republican Polit. | 203 | 4.21 | 1.15 |  |  |  | <.001 |
| **Trust All Economists** | |  |  | 7.66 | <.001 | .03 |  |
| Depoliticization | 198 | 3.77 | 1.04 |  |  |  | 1.00 |
| Control | 202 | 3.89 | 1.00 |  |  |  |  |
| Democrat Polit. | 203 | 3.42 | 1.08 |  |  |  | <.001 |
| Republican Polit. | 203 | 3.58 | 1.10 |  |  |  | 0.020 |
| **Skepticism All Economists** | |  |  | 9.87 | <.001 | .04 |  |
| Depoliticization | 198 | 3.65 | 1.22 |  |  |  | 1.00 |
| Control | 202 | 3.61 | 1.20 |  |  |  |  |
| Democrat Polit. | 203 | 4.06 | 1.10 |  |  |  | <.001 |
| Republican Polit. | 203 | 4.11 | 1.27 |  |  |  | <.001 |
| Note. Simple refers to simple effects in contrast to the control condition. | | | | | | |  |

**Item E9.** *Table and Data Visualization of* *Interactions Between Experimental Conditions and Participant Ideology in Study 5*

|  |  |  |  |  |  | **95% CI** | | **Semipartial** |
| --- | --- | --- | --- | --- | --- | --- | --- | --- |
|  | **B** | **SE** | **Beta** | ***t*** | ***p*** | **Low** | **High** | ***r*** |
| **Trust *EconPA*** |  |  |  |  |  |  |  |  |
| (Constant) | 4.03 | .08 |  | 50.24 | <.001 | 3.87 | 4.19 |  |
| Participant Ideology | 0.00 | .08 | .00 | 0.01 | .995 | -0.16 | 0.16 | .000 |
| Depolit Dummy | 0.12 | .11 | .04 | 1.07 | .284 | -0.10 | 0.35 | .034 |
| Democrat Dummy | -0.62 | .11 | -.21 | -5.49 | <.001 | -0.85 | -0.40 | -.174 |
| Republican Dummy | -0.82 | .11 | -.28 | -7.25 | <.001 | -1.05 | -0.60 | -.230 |
| Depolit X Ideoloy | -0.31 | .12 | -.11 | -2.58 | .010 | -0.54 | -0.07 | -.082 |
| Democrat X Ideology | -0.40 | .12 | -.15 | -3.44 | <.001 | -0.63 | -0.17 | -.109 |
| Republican X Ideology | 0.61 | .11 | .26 | 5.56 | <.001 | 0.39 | 0.82 | .176 |
| **Trust All Economists** |  |  |  |  |  |  |  |  |
| (Constant) | 3.89 | .07 |  | 53.03 | <.001 | 3.75 | 4.04 |  |
| Participant Ideology | 0.01 | .08 | .01 | 0.09 | .927 | -0.14 | 0.15 | .003 |
| Depolit Dummy | -0.13 | .10 | -.05 | -1.24 | .217 | -0.33 | 0.08 | -.042 |
| Democrat Dummy | -0.47 | .10 | -.19 | -4.52 | <.001 | -0.67 | -0.27 | -.155 |
| Republican Dummy | -0.33 | .10 | -.13 | -3.17 | .002 | -0.53 | -0.13 | -.109 |
| Depolit X Ideoloy | -0.12 | .11 | -.05 | -1.08 | .280 | -0.33 | 0.10 | -.037 |
| Democrat X Ideology | -0.28 | .11 | -.13 | -2.60 | .009 | -0.48 | -0.07 | -.089 |
| Republican X Ideology | 0.22 | .10 | .11 | 2.21 | .027 | 0.03 | 0.42 | .076 |
| **Skepticism All Economists** | |  |  |  |  |  |  |  |
| (Constant) | 3.61 | .08 |  | 43.53 | <.001 | 3.45 | 3.78 |  |
| Participant Ideology | 0.12 | .08 | .10 | 1.46 | .146 | -0.04 | 0.29 | .050 |
| Depolit Dummy | 0.05 | .12 | .02 | 0.39 | .695 | -0.19 | 0.28 | .013 |
| Democrat Dummy | 0.45 | .12 | .16 | 3.86 | <.001 | 0.22 | 0.68 | .132 |
| Republican Dummy | 0.50 | .12 | .18 | 4.26 | <.001 | 0.27 | 0.73 | .145 |
| Depolit X Ideoloy | 0.14 | .12 | .05 | 1.12 | .262 | -0.10 | 0.38 | .038 |
| Democrat X Ideology | 0.29 | .12 | .12 | 2.40 | .016 | 0.05 | 0.52 | .082 |
| Republican X Ideology | -0.17 | .11 | -.08 | -1.53 | .126 | -0.40 | 0.05 | -.052 |


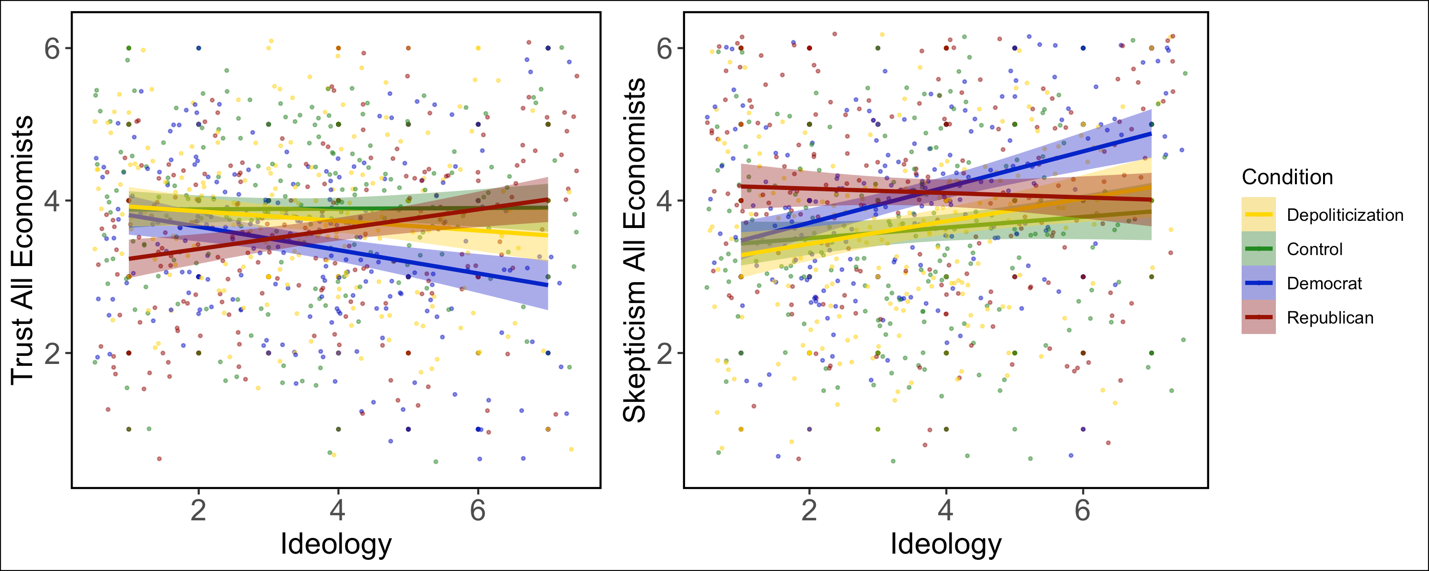


Note. Refer to Figure 5 in the main text to see a similar plot for *Trust EconPA.*
